# Supplementary material for: Electrophilic aromatic substitution of electron-rich arenes with N -fluorobenzenesulfonimide (NFSI) as an electrophile
Source: Royal Society of Chemistry journal article supplement (doi:10.1039/d4ra07008a), 2024-01-01

## Supporting Information

### Electrophilic Aromatic Substitution of Electron-rich Arenes with *N*-Fluorobenzenesulfonimide (NFSI) as Electrophile

Lina Bai,<sup>†</sup> Dewei Tu,<sup>†</sup> Ping Deng, Yongjie Chen, and Qiang Tang\*

## Table of Contents

|                                                        |            |
|--------------------------------------------------------|------------|
| <b>1. General Information</b>                          | <b>S3</b>  |
| <b>2. Procedure for the preparation of product 7</b>   | <b>S4</b>  |
| <b>3. Density Functional Theory (DFT) calculations</b> | <b>S8</b>  |
| <b>4. References</b>                                   | <b>S32</b> |
| <b>5. Spectra of NMR</b>                               | <b>S33</b> |

## 1. General Information

**Materials:** Unless otherwise specified, the chemicals were obtained commercially and used without further purification. All solvents were of ACS reagent grade or better unless otherwise noted. Flash column chromatography was performed on silica gel (300-400 mesh) or aluminum oxide (pore size 60 Å, activated, neutral) with freshly distilled solvents. TLC analyses were performed on commercial glass plates bearing a 0.25-mm layer of Silica gel GF<sub>254</sub>. Visualization was performed using a UV lamp or chemical stains like KMnO<sub>4</sub> and I<sub>2</sub>.

**NMR Spectroscopy:** <sup>1</sup>H and <sup>13</sup>C NMR spectra for all compounds were acquired in DMSO-*d*<sub>6</sub> or CDCl<sub>3</sub> solution on a Bruker Avance III HD -600 MHz or JEOL ECA400 (400 MHz), Spectrometer. The splitting patterns are designated as singlet (s), doublet (d), triplet (t), quartet (q), dd (doublet of doublets); m (multiplets), and etc. All first-order splitting patterns were assigned on the basis of the appearance of the multiplet. Splitting patterns that could not be easily interpreted are designated as multiplet (m) or broad (br).

**Mass Spectrometry:** High resolution mass spectral analysis (HRMS) was performed on ESI-QTOP massspectrometer. LC-MS was performed on a Shimadzu LCMS-IT-TOF under the conditions of electrospray ionization (ESI) in both positive and negative mode.

**Melting points:** Melting points (mp) were measured in open glass capillaries on a YIDIAN WUGUANG WRS-2C melting point apparatus and are uncorrected.

## 2. Procedure for the preparation of product 7

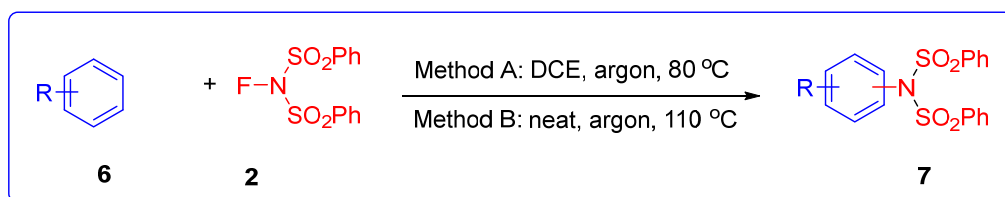

**Method A:** To a round bottom flask equipped with a reflux condenser, was added arene **6** (1.0 mmol), NFSI (2.0 mmol) and 5 mL of DCE. The resulting solution was stirred under argon at 80 °C for 1-10 hours until complete consumption of the arene, as monitored by TLC. The reaction mixture was concentrated under reduced pressure. Then, the residue was purified by flash column chromatography using a mixture of hexane and EtOAc as eluent to obtain the desired product.

**Method B:** A mixture of arene **6** (1.0 mmol) and NFSI (2.0 mmol) was stirred under argon at 110 °C for 1-4 hours until complete consumption of the arene, as monitored by TLC. After completion of the reaction, the reaction mixture was cooled to room temperature. Then, the residue was purified by flash column chromatography using a mixture of hexane and EtOAc as eluent to obtain the desired product.

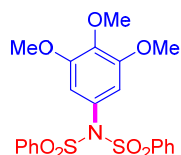

**N-(phenylsulfonyl)-N-(3,4,5-trimethoxyphenyl)benzenesulfonamide (7a).** The title compound was obtained as brownish solid (95% yield in method A and 91% yield in method B, mp: 95-96 °C). <sup>1</sup>H NMR (600 MHz, CDCl<sub>3</sub>) δ 7.99 (d, *J* = 8.0 Hz, 4H), 7.69 (t, *J* = 7.4 Hz, 2H), 7.57 (t, *J* = 7.7 Hz, 4H), 6.16 (s, 2H), 3.87 (s, 3H), 3.65 (s, 6H); <sup>13</sup>C NMR (151 MHz, CDCl<sub>3</sub>) δ 153.14, 139.42, 134.03, 128.98, 128.73, 108.99, 60.96, 56.12; HRMS (ESI) *m/z*: [M+H]<sup>+</sup>calcd for C<sub>21</sub>H<sub>22</sub>NO<sub>7</sub>S<sub>2</sub>: 464.0832; Found: 464.0828.

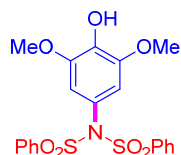

**N-(4-hydroxy-3,5-dimethoxyphenyl)-N-(phenylsulfonyl)benzenesulfonamide (7b).** The title compound was obtained as brown solid (67% yield in method A and 74% yield in method B, mp: 178-179 °C). <sup>1</sup>H NMR (600 MHz, CDCl<sub>3</sub>) δ 8.07 – 7.89 (m, 4H), 7.68 (t, *J* = 7.5 Hz, 2H), 7.56 (t, *J* = 7.9 Hz, 4H), 6.17 (s, 2H), 5.70 (s, 1H), 3.70 (s, 6H); <sup>13</sup>C NMR (151 MHz, CDCl<sub>3</sub>) δ 146.77, 139.42, 136.74, 133.98, 128.96, 128.69, 125.06, 108.81, 56.34; HRMS (ESI) *m/z*: [M+H]<sup>+</sup>calcd for C<sub>20</sub>H<sub>20</sub>NO<sub>7</sub>S<sub>2</sub>: 450.0676; Found: 450.0685.

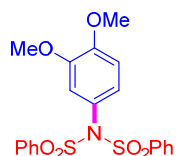

**N-(3,4-dimethoxyphenyl)-N-(phenylsulfonyl)benzenesulfonamide (7c).** The title compound was obtained as brown solid (91% yield in method A and 92% yield in method B, mp: 140-141 °C). <sup>1</sup>H NMR (600 MHz, CDCl<sub>3</sub>) δ 7.96 (d, *J* = 7.7 Hz, 4H), 7.68 (t, *J* = 7.4 Hz, 2H), 7.55 (t, *J* = 7.8 Hz, 4H), 6.80 (d, *J* = 8.6 Hz, 1H), 6.63 (dd, *J* = 8.5, 2.1 Hz, 1H), 6.38 (d, *J* = 2.0 Hz, 1H), 3.89 (s, 3H), 3.66 (s, 3H); <sup>13</sup>C NMR (151 MHz, CDCl<sub>3</sub>) δ 150.63, 148.96, 139.49, 133.94, 128.98, 128.63, 126.38, 124.37, 114.35, 110.73, 55.98, 55.91; HRMS (ESI) *m/z*: [M+H]<sup>+</sup>calcd for C<sub>20</sub>H<sub>20</sub>NO<sub>6</sub>S<sub>2</sub>: 434.0727; Found: 434.0734.

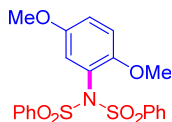

***N*-(2,5-dimethoxyphenyl)-*N*-(phenylsulfonyl)benzenesulfonamide (7d).** The title compound was obtained as white solid (82% yield in method A and 86% yield in method B, mp: 156-157 °C). <sup>1</sup>H NMR (600 MHz, CDCl<sub>3</sub>) δ 8.02 – 7.91 (m, 4H), 7.69 – 7.59 (m, 2H), 7.57 – 7.44 (m, 4H), 6.95 (dd, *J* = 9.0, 3.1 Hz, 1H), 6.76 (d, *J* = 9.1 Hz, 1H), 6.66 (d, *J* = 3.1 Hz, 1H), 3.68 (s, 3H), 3.33 (s, 3H); <sup>13</sup>C NMR (151 MHz, CDCl<sub>3</sub>) δ 153.16, 151.98, 139.99, 133.71, 128.88, 128.62, 122.73, 118.34, 117.56, 112.54, 55.82, 55.45; HRMS (ESI) *m/z*: [M+H]<sup>+</sup> calcd for C<sub>20</sub>H<sub>20</sub>NO<sub>6</sub>S<sub>2</sub>: 434.0727; Found: 434.0738.

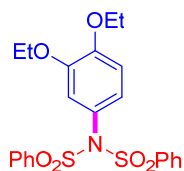

***N*-(3,4-diethoxyphenyl)-*N*-(phenylsulfonyl)benzenesulfonamide (7e).** The title compound was obtained as white solid (88% yield in method A and 83% yield in method B, mp: 116-117 °C). <sup>1</sup>H NMR (600 MHz, CDCl<sub>3</sub>) δ 7.95 (d, *J* = 7.5 Hz, 4H), 7.66 (t, *J* = 7.5 Hz, 2H), 7.54 (t, *J* = 7.9 Hz, 4H), 6.78 (d, *J* = 8.6 Hz, 1H), 6.59 (dd, *J* = 8.6, 2.4 Hz, 1H), 6.40 (d, *J* = 2.4 Hz, 1H), 4.10 (q, *J* = 7.0 Hz, 2H), 3.86 (q, *J* = 7.0 Hz, 2H), 1.46 (t, *J* = 7.0 Hz, 3H), 1.35 (t, *J* = 7.0 Hz, 3H); <sup>13</sup>C NMR (151 MHz, CDCl<sub>3</sub>) δ 150.42, 148.48, 139.57, 133.84, 128.94, 128.60, 126.13, 124.32, 116.27, 112.26, 64.53, 14.72, 14.55; <sup>1</sup>H NMR (400 MHz, DMSO-*d*<sub>6</sub>) δ 7.85 – 7.79 (m, 6H), 7.73 – 7.65 (m, 4H), 6.97 (d, *J* = 8.7 Hz, 1H), 6.58 (dd, *J* = 8.6, 2.5 Hz, 1H), 6.30 (d, *J* = 2.5 Hz, 1H), 4.04 (q, *J* = 7.0 Hz, 2H), 3.77 (q, *J* = 7.0 Hz, 2H), 1.33 (t, *J* = 7.0 Hz, 3H), 1.22 (t, *J* = 7.0 Hz, 3H); <sup>13</sup>C NMR (101 MHz, DMSO-*d*<sub>6</sub>) δ 150.40, 148.24, 139.10, 135.15, 130.08, 128.57, 128.56, 125.70, 124.80, 116.09, 113.06, 64.41, 64.36, 15.13, 14.96; HRMS (ESI) *m/z*: [M+H]<sup>+</sup> calcd for C<sub>22</sub>H<sub>24</sub>NO<sub>6</sub>S<sub>2</sub>: 462.1040; Found: 462.1048.

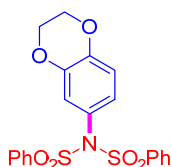

***N*-(2,3-dihydrobenzo[*b*][1,4]dioxin-6-yl)-*N*-(phenylsulfonyl)benzenesulfonamide (7f).** The title compound was obtained as white solid (80% yield in method A and 87% yield in method B, mp: 181-182 °C). <sup>1</sup>H NMR (600 MHz, CDCl<sub>3</sub>) δ 8.00 – 7.91 (m, 4H), 7.67 (t, *J* = 7.5 Hz, 2H), 7.55 (t, *J* = 7.9 Hz, 4H), 6.79 (d, *J* = 8.6 Hz, 1H), 6.60 (d, *J* = 2.5 Hz, 1H), 6.45 (dd, *J* = 8.6, 2.5 Hz, 1H), 4.27 (dd, *J* = 5.7, 2.4 Hz, 2H), 4.23 (dd, *J* = 5.7, 2.4 Hz, 2H); <sup>13</sup>C NMR (151 MHz, CDCl<sub>3</sub>) δ 145.47, 143.65, 139.52, 133.95, 129.01, 128.57, 126.79, 124.77, 120.45, 117.48, 64.35, 64.07; <sup>1</sup>H NMR (400 MHz, DMSO-*d*<sub>6</sub>) δ 7.87 – 7.78 (m, 6H), 7.73 – 7.66 (m, 4H), 6.88 (d, *J* = 8.6 Hz, 1H), 6.48 (d, *J* = 2.5 Hz, 1H), 6.40 (dd, *J* = 8.6, 2.6 Hz, 1H), 4.27 (ddd, *J* = 12.1, 3.5, 1.6 Hz, 4H); <sup>13</sup>C NMR (101 MHz, DMSO-*d*<sub>6</sub>) δ 145.80, 143.91, 139.04, 135.20, 130.12, 130.10, 128.52, 128.51, 126.28, 124.95, 120.28, 117.97, 64.71, 64.45; HRMS (ESI) *m/z*: [M+H]<sup>+</sup> calcd for C<sub>20</sub>H<sub>18</sub>NO<sub>6</sub>S<sub>2</sub>: 432.0570; Found: 432.0560.

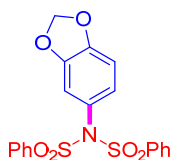

***N*-(phenylsulfonyl)-*N*-(benzo[*d*][1,3]dioxol-5-yl)benzenesulfonamide (7g).** The title compound was obtained as white solid (92% yield in method A and 90% yield in method B, mp: 178-179 °C). <sup>1</sup>H NMR (600 MHz, CDCl<sub>3</sub>) δ 8.03 – 7.92 (m, 4H), 7.68 (t, *J* = 7.5 Hz, 2H), 7.56 (t, *J* = 7.9 Hz, 4H), 6.73 (d, *J* = 8.2 Hz, 1H), 6.49 (d, *J* = 2.1 Hz, 1H), 6.45 (dd, *J* = 8.2, 2.1 Hz, 1H), 6.02 (s, 2H); <sup>13</sup>C NMR (151 MHz, CDCl<sub>3</sub>) δ 149.37, 148.07, 139.40, 134.01, 129.04, 128.58, 127.29, 125.96, 111.84, 108.16, 102.14; <sup>1</sup>H NMR (400 MHz, DMSO-*d*<sub>6</sub>) δ 7.89 – 7.79 (m, 6H), 7.74 – 7.64 (m, 4H), 6.92 (d, *J* = 8.3 Hz, 1H), 6.58 (d, *J* = 2.1 Hz, 1H), 6.39 (dd, *J* =

8.3, 2.2 Hz, 1H), 6.13 (s, 2H); <sup>13</sup>C NMR (101 MHz, DMSO-*d*<sub>6</sub>) δ 154.32, 153.03, 143.71, 139.98, 134.87, 133.31, 131.63, 131.10, 116.65, 113.55, 107.67; HRMS (ESI) *m/z*: [M+H]<sup>+</sup>calcd for C<sub>19</sub>H<sub>16</sub>NO<sub>6</sub>S<sub>2</sub>: 418.0414; Found: 418.0409.

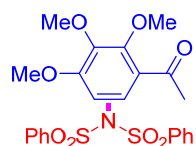

***N*-(5-acetyl-2,3,4-trimethoxyphenyl)-*N*-(phenylsulfonyl)benzenesulfonamide (7h).** The title compound was obtained as yellow solid (51% yield in method A and 54% yield in method B, mp: 200-201 °C). <sup>1</sup>H NMR (600 MHz, CDCl<sub>3</sub>) δ 8.16 – 8.01 (m, 4H), 7.68 (d, *J* = 7.5 Hz, 2H), 7.57 (t, *J* = 7.9 Hz, 4H), 5.99 (s, 1H), 3.92 (d, *J* = 7.2 Hz, 6H), 3.50 (s, 3H), 2.46 (s, 3H); <sup>13</sup>C NMR (151 MHz, CDCl<sub>3</sub>) δ 199.51, 153.34, 151.37, 143.51, 138.39, 134.16, 131.34, 129.94, 128.57, 125.25, 112.26, 61.79, 61.00, 55.88, 32.06; HRMS (ESI) *m/z*: [M+H]<sup>+</sup>calcd for C<sub>23</sub>H<sub>24</sub>NO<sub>8</sub>S<sub>2</sub>: 506.0938; Found: 506.0930.

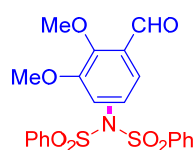

***N*-(3-formyl-4,5-dimethoxyphenyl)-*N*-(phenylsulfonyl)benzenesulfonamide (7i).** The title compound was obtained as white solid (68% yield in method A and 55% yield in method B, mp: 171-172 °C). <sup>1</sup>H NMR (600 MHz, CDCl<sub>3</sub>) δ 10.34 (s, 1H), 7.99 – 7.86 (m, 4H), 7.70 (t, *J* = 7.5 Hz, 2H), 7.57 (t, *J* = 7.9 Hz, 4H), 7.06 (d, *J* = 2.5 Hz, 1H), 6.69 (d, *J* = 2.5 Hz, 1H), 4.04 (s, 3H), 3.72 (s, 3H); <sup>13</sup>C NMR (151 MHz, CDCl<sub>3</sub>) δ 188.53, 153.91, 153.31, 139.14, 134.24, 129.91, 129.58, 129.13, 128.63, 122.33, 120.63, 62.36, 56.19; HRMS (ESI) *m/z*: [M+H]<sup>+</sup>calcd for C<sub>21</sub>H<sub>20</sub>NO<sub>7</sub>S<sub>2</sub>: 462.0676; Found: 462.0683.

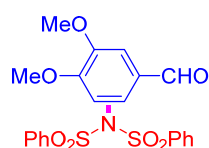

***N*-(5-formyl-2,3-dimethoxyphenyl)-*N*-(phenylsulfonyl)benzenesulfonamide (7j).** The title compound was obtained as white solid (49% yield in method A and 43% yield in method B, mp: 203-204 °C). <sup>1</sup>H NMR (600 MHz, CDCl<sub>3</sub>) δ 9.31 (s, 1H), 7.95 (dt, *J* = 3.1, 2.1 Hz, 4H), 7.72 (t, *J* = 7.5 Hz, 2H), 7.58 (t, *J* = 7.9 Hz, 4H), 7.44 (s, 1H), 6.32 (s, 1H), 3.96 (s, 3H), 3.70 (s, 3H); <sup>13</sup>C NMR (151 MHz, CDCl<sub>3</sub>) δ 187.36, 153.49, 150.78, 138.18, 134.61, 130.22, 129.66, 129.32, 128.98, 128.84, 128.63, 114.65, 109.03, 56.32, 56.30; HRMS (ESI) *m/z*: [M+H]<sup>+</sup>calcd for C<sub>21</sub>H<sub>20</sub>NO<sub>7</sub>S<sub>2</sub>: 462.0676; Found: 462.0670.

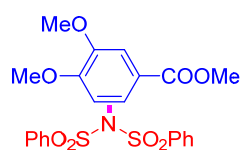

***N*-(5-methoxycarbonyl-2,3-dimethoxyphenyl)-*N*-(phenylsulfonyl)benzenesulfonamide (7k).** The title compound was obtained as brown oil (46% yield in method A and 58% yield in method B). <sup>1</sup>H NMR (600 MHz, CDCl<sub>3</sub>) δ 8.02 – 7.93 (m, 4H), 7.71 – 7.64 (m, 2H), 7.58 – 7.51 (m, 5H), 6.42 (s, 1H), 3.96 (s, 3H), 3.71 (s, 3H), 3.30 (s, 3H); <sup>13</sup>C NMR (151 MHz, CDCl<sub>3</sub>) δ 164.95, 151.47, 149.95, 139.81, 133.83, 129.18, 128.76, 126.71, 124.47, 116.06, 113.85, 56.26, 56.19, 51.69; HRMS (ESI) *m/z*: [M+H]<sup>+</sup>calcd for C<sub>22</sub>H<sub>22</sub>NO<sub>8</sub>S<sub>2</sub>: 492.0781; Found: 492.0773.

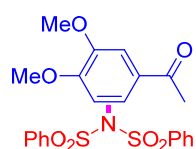

***N*-(5-acetyl-2,3-dimethoxyphenyl)-*N*-(phenylsulfonyl)benzenesulfonamide (7l).** The title compound was obtained as yellow solid (57% yield in method A and 51% yield in method B, mp: 136-137 °C). <sup>1</sup>H NMR (600 MHz, CDCl<sub>3</sub>) δ 8.03 – 7.92 (m, 4H), 7.74 – 7.58 (m, 2H), 7.58 – 7.48 (m, 4H), 7.17 (s, 1H), 6.25 (s, 1H), 3.93 (s, 3H), 3.59 (s, 3H), 2.34 (s, 3H); <sup>13</sup>C NMR (151 MHz, CDCl<sub>3</sub>) δ 197.15, 150.62, 149.83, 138.69, 134.20, 133.59, 129.53, 128.78, 124.65, 115.67, 111.81, 56.21, 56.00, 29.47; HRMS (ESI) m/z: [M+H]<sup>+</sup> calcd for C<sub>22</sub>H<sub>22</sub>NO<sub>7</sub>S<sub>2</sub>: 476.0832; Found: 476.0837.

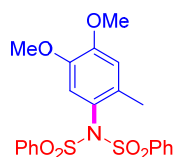

***N*-(4,5-dimethoxy-2-methylphenyl)-*N*-(phenylsulfonyl)benzenesulfonamide (7m).** The title compound was obtained as white solid (78% yield in method A and 59% yield in method B, mp: 143-144 °C). <sup>1</sup>H NMR (600 MHz, CDCl<sub>3</sub>) δ 7.96 (d, *J* = 7.5 Hz, 4H), 7.68 (t, *J* = 7.5 Hz, 2H), 7.55 (t, *J* = 7.9 Hz, 4H), 6.68 (s, 1H), 6.23 (s, 1H), 3.88 (s, 3H), 3.59 (s, 3H), 1.88 (s, 3H); <sup>13</sup>C NMR (151 MHz, CDCl<sub>3</sub>) δ 150.33, 146.78, 139.56, 134.00, 133.49, 128.95, 128.93, 124.60, 114.64, 113.05, 55.89, 55.85, 17.77; HRMS (ESI) m/z: [M+H]<sup>+</sup> calcd for C<sub>21</sub>H<sub>22</sub>NO<sub>6</sub>S<sub>2</sub>: 448.0883; Found: 448.0891.

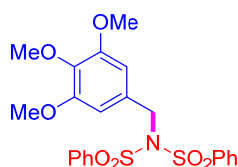

***N*-(phenylsulfonyl)-*N*-(3,4,5-trimethoxybenzyl)benzenesulfonamide (7n).**<sup>1</sup> The title compound was obtained as yellow solid (53% yield in method A, mp: 109-110 °C), and the analytical data are consistent with those in the literature. <sup>1</sup>H NMR (600 MHz, CDCl<sub>3</sub>) δ 7.76 (dd, *J* = 8.5, 1.1 Hz, 4H), 7.56 – 7.47 (m, 2H), 7.43 – 7.34 (m, 4H), 6.46 (s, 2H), 4.82 (s, 2H), 3.75 (s, 3H), 3.62 (s, 6H); <sup>13</sup>C NMR (151 MHz, CDCl<sub>3</sub>) δ 153.10, 140.11, 137.65, 133.70, 129.84, 128.80, 128.10, 105.90, 60.88, 56.00, 52.88; MS (ESI) m/z: [M+H]<sup>+</sup> calcd for C<sub>22</sub>H<sub>24</sub>NO<sub>7</sub>S<sub>2</sub>: 478.1; Found: 478.2.

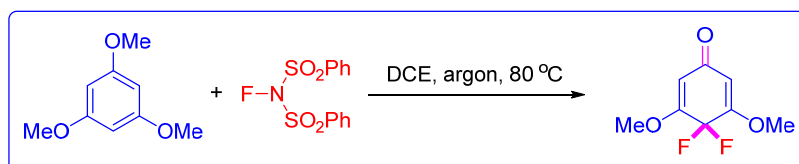

**4,4-Difluoro-3,5-dimethoxycyclohexa-2,5-dien-1-one (7o).**<sup>2</sup> The title compound was obtained as brown oil (48% yield in method A) and the analytical data are consistent with those in the literature. <sup>1</sup>H NMR (600 MHz, CDCl<sub>3</sub>) δ 5.48 (s, 2H), 3.82 (s, 6H); <sup>13</sup>C NMR (151 MHz, CDCl<sub>3</sub>) δ 184.56, 161.19, 161.04, 160.90, 102.48, 102.46, 102.43, 56.75; <sup>19</sup>F NMR (565 MHz, CDCl<sub>3</sub>) δ -112.50, -112.51.

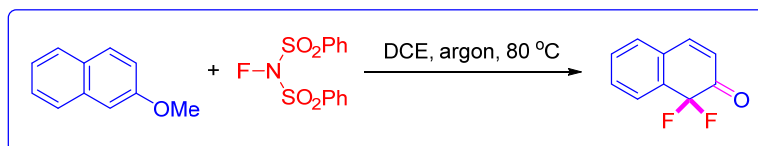

**1,1-Difluoronaphthalen-2(1H)-one (7p).**<sup>3</sup> The title compound was obtained as yellowish solid (47% yield in method A, mp: 52-53 °C) and the analytical data are consistent with those in the literature. <sup>1</sup>H NMR (600 MHz, CDCl<sub>3</sub>) δ 7.88 – 7.77 (m, 1H), 7.53 (dd, *J* = 6.2, 2.6 Hz, 2H), 7.44 (d, *J* = 10.1 Hz, 1H), 7.40 – 7.33 (m, 1H), 6.22 (dt, *J* = 10.1, 2.7 Hz, 1H); <sup>13</sup>C NMR (151 MHz, CDCl<sub>3</sub>) δ 187.70, 187.54, 187.38, 145.70, 133.42, 133.26, 133.10, 132.14, 132.13, 132.12, 131.01, 131.00, 130.98, 130.33, 130.29, 130.25, 129.94, 127.75, 127.72, 127.70, 123.49, 123.48, 123.46, 107.18, 105.56, 103.94; <sup>19</sup>F NMR (565 MHz, CDCl<sub>3</sub>) δ -101.16.

### 3. DFT Calculations

All reported structures were optimized at Density Functional Theory level as implemented in Gaussian 09.<sup>4</sup> The geometry optimizations and single point electronic energies for those structures were calculated at B97XD /6-311++ level.<sup>5</sup> The transition states were located and confirmed by frequency calculations (single imaginary frequency). Intrinsic Reaction Coordinate (IRC) calculations were performed to confirm that the first-order saddle points found were real transition states connecting the reactants and the products. All geometry optimizations were carried out without any symmetry constraints. The stationary points were characterized as minima by full vibration frequencies calculations (no imaginary frequency). Distortion energies were obtained by performing a single point calculation for each fragment of the optimized ground state and transition state structures. Reported energy values correspond to Gibbs Free (G) energies in kcal/mol<sup>-1</sup>.

**Table S1.** Data of calculated enthalpies, free energies, and imaginary frequencies.

|            | H [hartree]  | H-correction | G [hartree]  | G-correction | Frequency |
|------------|--------------|--------------|--------------|--------------|-----------|
| TMB        | -575.376305  | 0.212378     | -575.428296  | 0.160387     |           |
| NFSI       | -1714.104871 | 0.225294     | -1714.174121 | 0.156044     |           |
| TS1        | -2289.458622 | 0.438217     | -2289.555028 | 0.341810     | -357.3532 |
| Int1       | -2289.520764 | 0.439503     | -2289.617848 | 0.342419     |           |
| TS2        | -2289.51463  | 0.438506     | -2289.611147 | 0.341990     | -95.2605  |
| TS2'       | -2289.510762 | 0.439484     | -2289.606152 | 0.344095     | -179.8377 |
| Adduct I   | -2289.552996 | 0.443051     | -2289.647906 | 0.348140     |           |
| Adduct II  | -2289.537162 | 0.442039     | -2289.634194 | 0.345007     |           |
| Adduct II' | -2389.466451 | 0.443908     | -2389.567190 | 0.343169     |           |
| TS3        | -2289.512146 | 0.437590     | -2289.611207 | 0.338529     | -492.3781 |
| TS3'       | -2389.441430 | 0.439544     | -2389.540556 | 0.340417     | -104.6049 |
| Products   | -2289.607421 | 0.439238     | -2289.709151 | 0.337508     |           |



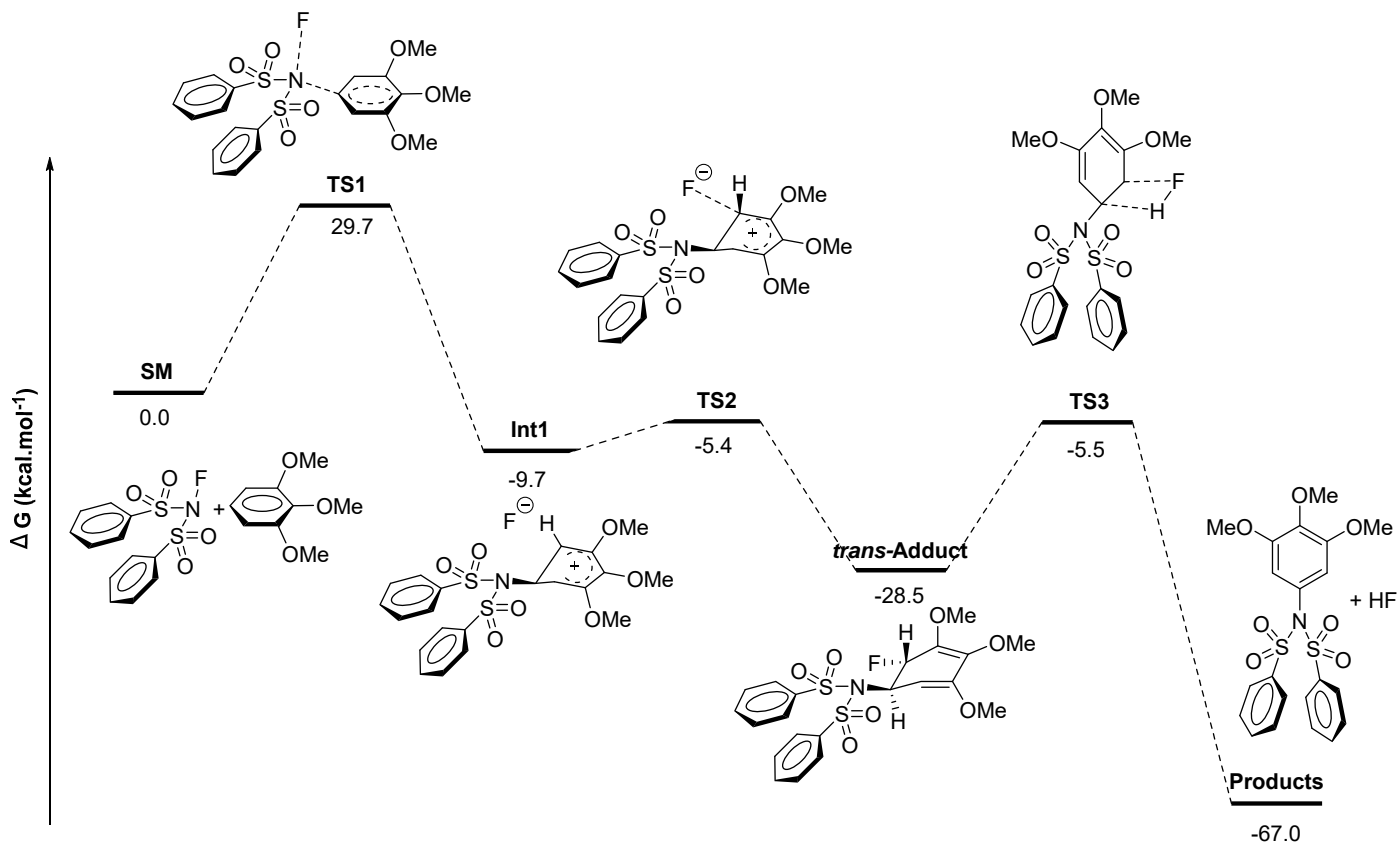

Figure S1. Computed Gibbs energy profile for the amidation reaction through *trans*-addition pathway.

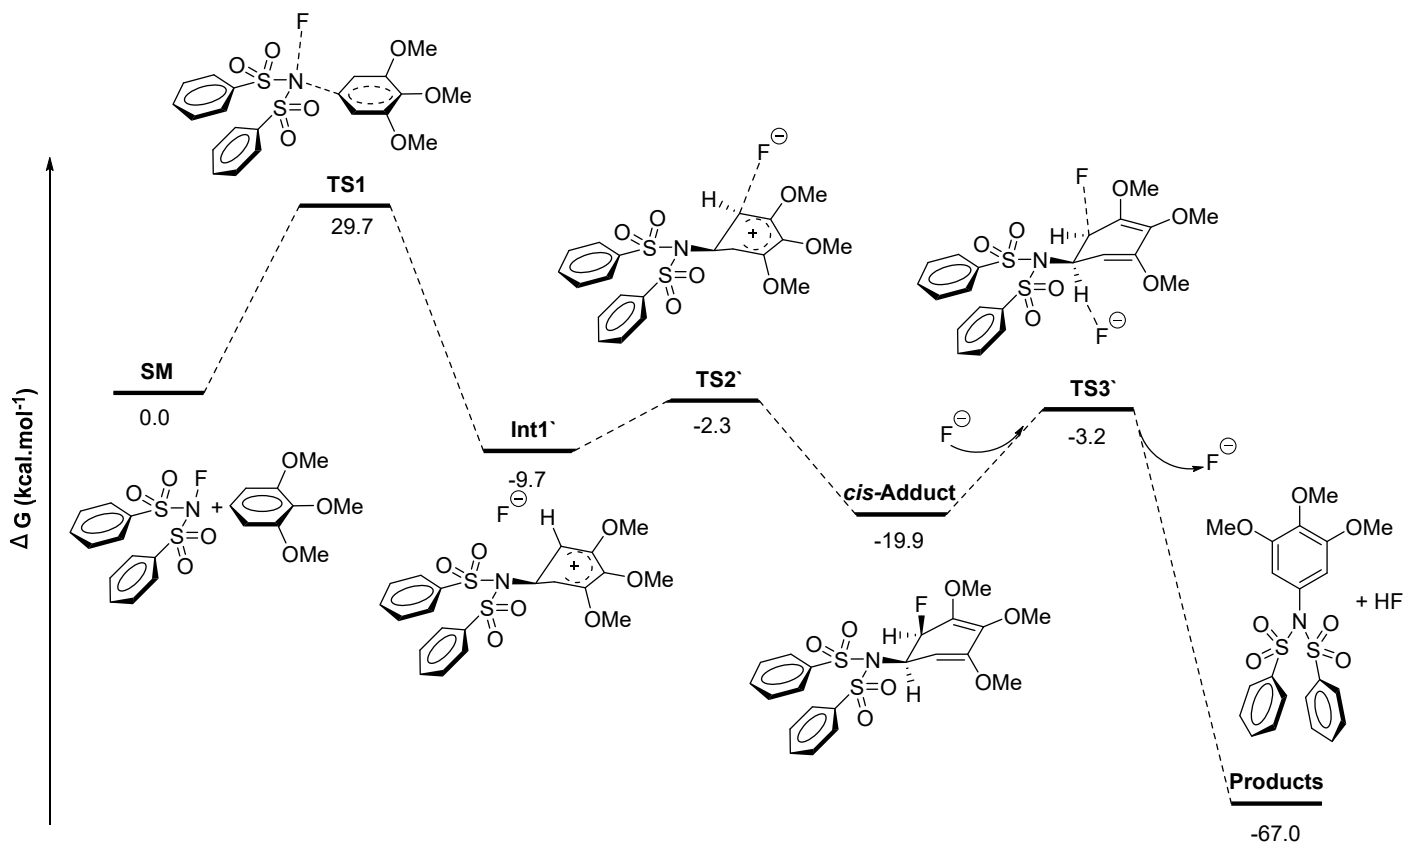

Figure S2. Computed Gibbs energy profile for the amidation reaction through *cis*-addition pathway.

## Cartesian Coordinates

### TMB

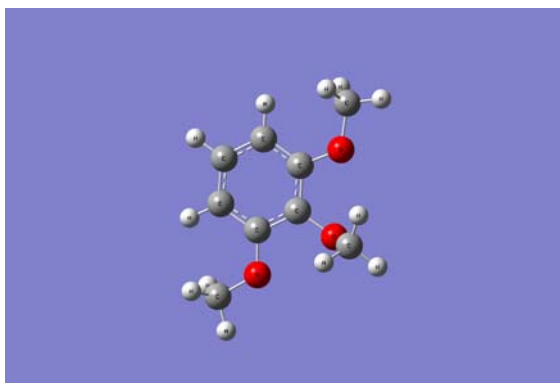

Symbolic Z-matrix: Charge = 0 Multiplicity = 1

|   |          |          |          |
|---|----------|----------|----------|
| C | -0.93536 | -1.77774 | 0.00009  |
| C | 0.33233  | -2.34295 | 0.00014  |
| C | 1.46449  | -1.53398 | 0.00009  |
| C | 1.32203  | -0.14646 | 0.       |
| C | 0.04056  | 0.45373  | -0.00004 |
| C | -1.08993 | -0.3858  | -0.00001 |
| H | -1.80559 | -2.41833 | 0.00012  |
| H | 0.44004  | -3.42103 | 0.00021  |
| H | 2.4474   | -1.98319 | 0.00012  |
| O | 0.0681   | 1.8144   | -0.00013 |
| O | 2.36728  | 0.72756  | -0.00005 |
| O | -2.32176 | 0.22357  | -0.0001  |
| C | -3.48611 | -0.58775 | -0.00013 |
| H | -4.32783 | 0.10377  | -0.00023 |
| H | -3.53724 | -1.21873 | -0.89418 |
| H | -3.53737 | -1.21861 | 0.894    |
| C | 3.68547  | 0.20323  | -0.00003 |
| H | 3.87959  | -0.40008 | -0.89405 |
| H | 4.34662  | 1.06863  | -0.00008 |
| H | 3.87961  | -0.39999 | 0.89405  |
| C | -1.09628 | 2.64138  | 0.00016  |
| H | -1.70601 | 2.48117  | 0.89059  |
| H | -0.70507 | 3.65889  | 0.00015  |
| H | -1.70638 | 2.48129  | -0.89004 |

# NFSI

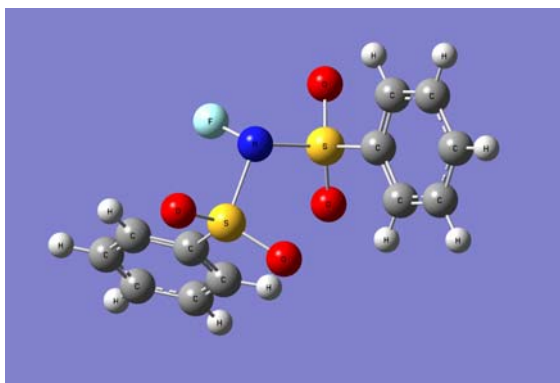

Symbolic Z-matrix: Charge = 0 Multiplicity = 1

|   |          |          |          |
|---|----------|----------|----------|
| C | -3.88995 | -1.83987 | -0.02095 |
| C | -2.66227 | -1.34454 | 0.40986  |
| C | -2.48215 | 0.0356   | 0.44585  |
| C | -3.4828  | 0.93034  | 0.06866  |
| C | -4.70207 | 0.41691  | -0.36102 |
| C | -4.90363 | -0.9632  | -0.40508 |
| H | -4.05145 | -2.91049 | -0.05781 |
| H | -1.8587  | -2.00625 | 0.70132  |
| H | -3.30923 | 1.99745  | 0.12027  |
| H | -5.4943  | 1.09409  | -0.65696 |
| H | -5.8561  | -1.35668 | -0.74139 |
| S | -0.93117 | 0.69929  | 1.0342   |
| N | -0.13209 | 1.01619  | -0.58883 |
| O | -1.13189 | 2.03454  | 1.56626  |
| O | -0.2066  | -0.31959 | 1.78195  |
| F | 0.68133  | 2.15539  | -0.41785 |
| S | 0.90613  | -0.24671 | -1.32595 |
| C | 2.40572  | -0.35417 | -0.35732 |
| C | 2.48576  | -1.28431 | 0.67748  |
| C | 3.4717   | 0.48107  | -0.69295 |
| C | 3.67395  | -1.37314 | 1.3966   |
| H | 1.63913  | -1.91357 | 0.91155  |
| C | 4.64855  | 0.38311  | 0.04275  |
| H | 3.37853  | 1.17866  | -1.51466 |
| C | 4.74841  | -0.54145 | 1.08253  |
| H | 3.7581   | -2.09175 | 2.203    |
| H | 5.48749  | 1.02386  | -0.20103 |
| H | 5.6691   | -0.61506 | 1.65009  |
| O | 1.23793  | 0.30235  | -2.62729 |
| O | 0.09599  | -1.44621 | -1.16873 |

# TS1

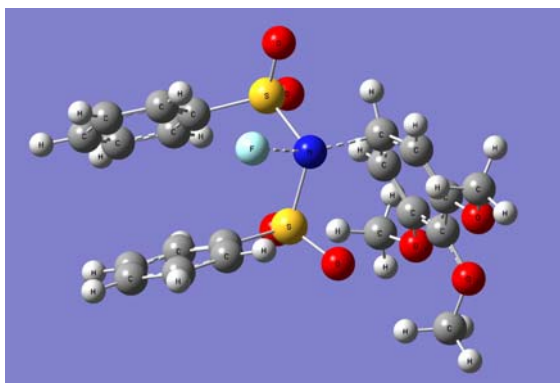

Symbolic Z-matrix: Charge = 0 Multiplicity = 1

|   |          |          |          |
|---|----------|----------|----------|
| C | 5.19487  | -0.70779 | 0.95901  |
| C | 3.87783  | -0.82671 | 1.38951  |
| C | 2.93922  | -1.34953 | 0.50253  |
| C | 3.27418  | -1.75502 | -0.78608 |
| C | 4.59718  | -1.6152  | -1.20404 |
| C | 5.55326  | -1.0957  | -0.33352 |
| H | 5.94158  | -0.30455 | 1.6331   |
| H | 3.56534  | -0.51415 | 2.37435  |
| H | 2.51882  | -2.17385 | -1.4366  |
| H | 4.878    | -1.92599 | -2.20379 |
| H | 6.58268  | -0.99661 | -0.66004 |
| S | 1.27654  | -1.71661 | 1.08864  |
| N | 0.11153  | -0.29784 | 0.92873  |
| O | 0.77223  | -2.79081 | 0.22091  |
| O | 1.27896  | -1.93879 | 2.52914  |
| F | 1.74422  | 0.78956  | 1.59561  |
| S | 0.07694  | 0.62528  | -0.6349  |
| C | 1.32599  | 1.92289  | -0.63133 |
| C | 2.43223  | 1.77666  | -1.4579  |
| C | 1.07439  | 3.10028  | 0.0686   |
| C | 3.3206   | 2.84455  | -1.57921 |
| H | 2.58863  | 0.85515  | -2.00049 |
| C | 1.96764  | 4.15532  | -0.06353 |
| H | 0.20624  | 3.17908  | 0.70738  |
| C | 3.09116  | 4.02837  | -0.8835  |
| H | 4.18806  | 2.74697  | -2.22158 |
| H | 1.79157  | 5.07679  | 0.47928  |
| H | 3.78479  | 4.85607  | -0.98049 |
| O | -1.22246 | 1.29998  | -0.56107 |
| O | 0.37321  | -0.27112 | -1.75833 |
| C | -3.0519  | -1.27863 | -0.9205  |
| C | -3.85741 | -0.27412 | -0.2964  |
| C | -3.55448 | 0.15544  | 1.04324  |
| C | -2.43622 | -0.31538 | 1.66556  |

|   |          |          |          |
|---|----------|----------|----------|
| C | -1.56365 | -1.25326 | 1.00981  |
| C | -1.95136 | -1.77355 | -0.26925 |
| H | -2.1579  | 0.0199   | 2.65386  |
| H | -1.11643 | -1.97728 | 1.68383  |
| H | -1.31553 | -2.5246  | -0.71063 |
| O | -3.45349 | -1.63472 | -2.15957 |
| O | -4.85091 | 0.16774  | -1.04088 |
| O | -4.44162 | 1.02888  | 1.59099  |
| C | -2.66872 | -2.60896 | -2.85452 |
| H | -2.72944 | -3.58493 | -2.36281 |
| H | -3.10561 | -2.67581 | -3.84875 |
| H | -1.62602 | -2.28801 | -2.92159 |
| C | -4.78615 | 1.28505  | -1.95653 |
| H | -3.89585 | 1.21326  | -2.57873 |
| H | -5.68315 | 1.17788  | -2.56263 |
| H | -4.79638 | 2.22788  | -1.41485 |
| C | -4.19041 | 1.49308  | 2.91813  |
| H | -4.99227 | 2.19408  | 3.14114  |
| H | -4.21799 | 0.66564  | 3.6336   |
| H | -3.22458 | 2.00268  | 2.97783  |

# Int1

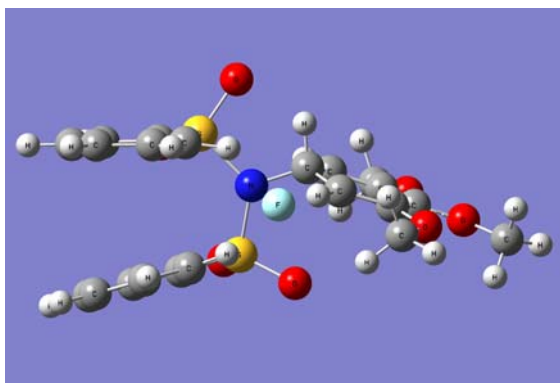

Symbolic Z-matrix: Charge = 0 Multiplicity = 1

|   |          |          |          |
|---|----------|----------|----------|
| C | -3.52399 | 1.86933  | -1.94346 |
| C | -2.4233  | 1.07778  | -1.61332 |
| C | -2.60827 | -0.30116 | -1.56811 |
| C | -3.84167 | -0.90313 | -1.82753 |
| C | -4.92109 | -0.09201 | -2.16229 |
| C | -4.76041 | 1.29269  | -2.22538 |
| H | -3.39973 | 2.94571  | -1.96151 |
| H | -1.4913  | 1.57155  | -1.33045 |
| H | -3.95106 | -1.97797 | -1.76256 |
| H | -5.88528 | -0.54236 | -2.3679  |
| H | -5.60507 | 1.92178  | -2.48419 |
| S | -1.23505 | -1.4351  | -1.32306 |
| N | -0.13001 | -0.62664 | -0.25043 |
| O | -1.74186 | -2.63609 | -0.67438 |
| O | -0.48036 | -1.54465 | -2.57676 |
| F | -0.38523 | 2.77289  | -0.29198 |
| S | -0.20407 | -0.80849 | 1.49796  |
| C | -1.79011 | -0.11552 | 1.93596  |
| C | -2.72188 | -0.95705 | 2.54291  |
| C | -2.00995 | 1.24813  | 1.73596  |
| C | -3.92255 | -0.40413 | 2.97905  |
| H | -2.50293 | -2.00934 | 2.66797  |
| C | -3.22141 | 1.77363  | 2.18018  |
| H | -1.2907  | 1.87867  | 1.20486  |
| C | -4.16688 | 0.95797  | 2.80227  |
| H | -4.66235 | -1.03613 | 3.45616  |
| H | -3.4226  | 2.82789  | 2.03027  |
| H | -5.10337 | 1.38406  | 3.14541  |
| O | 0.8764   | 0.07373  | 1.93641  |
| O | -0.16547 | -2.21694 | 1.86615  |
| C | 3.51611  | -1.08927 | -0.26959 |
| C | 3.92478  | 0.3078   | -0.1706  |
| C | 2.9685   | 1.35879  | -0.31175 |
| C | 1.65018  | 1.05468  | -0.51431 |

|   |         |          |          |
|---|---------|----------|----------|
| C | 1.22524 | -0.33457 | -0.77244 |
| C | 2.22499 | -1.40324 | -0.52176 |
| H | 0.82659 | 1.83404  | -0.50126 |
| H | 1.08243 | -0.35802 | -1.87407 |
| H | 1.89055 | -2.42683 | -0.61423 |
| O | 4.52655 | -1.96265 | -0.07849 |
| O | 5.19983 | 0.44384  | 0.07208  |
| O | 3.44576 | 2.61855  | -0.14424 |
| C | 4.20495 | -3.35563 | -0.08624 |
| H | 3.81705 | -3.66209 | -1.06263 |
| H | 5.1413  | -3.8713  | 0.11421  |
| H | 3.47596 | -3.59109 | 0.69453  |
| C | 5.93929 | 1.6882   | 0.2107   |
| H | 5.55606 | 2.2615   | 1.04988  |
| H | 6.95877 | 1.35698  | 0.39258  |
| H | 5.87476 | 2.26831  | -0.70606 |
| C | 2.5513  | 3.71967  | -0.43104 |
| H | 3.11192 | 4.61243  | -0.16084 |
| H | 2.31419 | 3.73056  | -1.49832 |
| H | 1.61803 | 3.64557  | 0.12914  |

# TS2

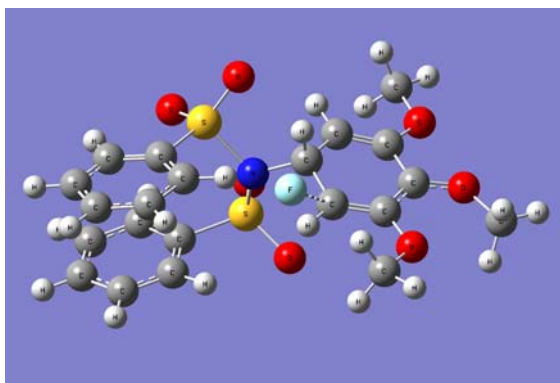

Symbolic Z-matrix: Charge = 0 Multiplicity = 1

|   |          |          |          |
|---|----------|----------|----------|
| C | -3.1147  | 3.11202  | -0.8733  |
| C | -2.11327 | 2.16507  | -1.08902 |
| C | -2.51554 | 0.85943  | -1.36756 |
| C | -3.85593 | 0.47808  | -1.44116 |
| C | -4.83353 | 1.44639  | -1.23041 |
| C | -4.4622  | 2.76104  | -0.94796 |
| H | -2.82196 | 4.1307   | -0.64697 |
| H | -1.06296 | 2.477    | -0.99546 |
| H | -4.11984 | -0.54822 | -1.659   |
| H | -5.88056 | 1.17218  | -1.28848 |
| H | -5.22687 | 3.51296  | -0.7853  |
| S | -1.2954  | -0.39519 | -1.7691  |
| N | -0.17172 | -0.38042 | -0.42159 |
| O | -1.95478 | -1.69533 | -1.77759 |
| O | -0.49285 | 0.04281  | -2.90833 |
| F | 0.50572  | 3.18801  | -0.39746 |
| S | -0.28985 | -1.53555 | 0.87728  |
| C | -1.96193 | -1.32269 | 1.47834  |
| C | -2.88931 | -2.33428 | 1.24417  |
| C | -2.27068 | -0.18534 | 2.22316  |
| C | -4.16917 | -2.19568 | 1.77573  |
| H | -2.60798 | -3.19723 | 0.65594  |
| C | -3.55535 | -0.0607  | 2.74161  |
| H | -1.52356 | 0.57887  | 2.39439  |
| C | -4.49947 | -1.0643  | 2.52037  |
| H | -4.90578 | -2.97229 | 1.60701  |
| H | -3.81694 | 0.81724  | 3.31999  |
| H | -5.49785 | -0.96239 | 2.93053  |
| O | 0.65402  | -1.00506 | 1.86215  |
| O | -0.12557 | -2.89794 | 0.38869  |
| C | 3.45942  | -0.90347 | -0.71029 |
| C | 3.9252   | 0.19865  | 0.13127  |
| C | 3.01941  | 1.19035  | 0.59624  |
| C | 1.6868   | 1.07366  | 0.29583  |



|   |         |          |          |
|---|---------|----------|----------|
| C | 1.20769 | 0.09124  | -0.69402 |
| C | 2.16415 | -0.97594 | -1.08702 |
| H | 0.96271 | 1.83889  | 0.58397  |
| H | 1.09213 | 0.72394  | -1.59708 |
| H | 1.79636 | -1.75833 | -1.73449 |
| O | 4.43574 | -1.77436 | -1.04176 |
| O | 5.20613 | 0.13214  | 0.38584  |
| O | 3.54208 | 2.17796  | 1.36541  |
| C | 4.06696 | -2.90902 | -1.82807 |
| H | 3.68908 | -2.5998  | -2.80755 |
| H | 4.98065 | -3.48565 | -1.95353 |
| H | 3.31382 | -3.51222 | -1.31261 |
| C | 5.99376 | 1.09112  | 1.14113  |
| H | 5.64567 | 1.13833  | 2.16935  |
| H | 7.0026  | 0.6889   | 1.08781  |
| H | 5.93948 | 2.07257  | 0.67759  |
| C | 2.64953 | 3.22781  | 1.81259  |
| H | 3.30515 | 4.00377  | 2.20352  |
| H | 2.03039 | 3.59427  | 0.98702  |
| H | 2.01186 | 2.84674  | 2.6158   |

TS2`

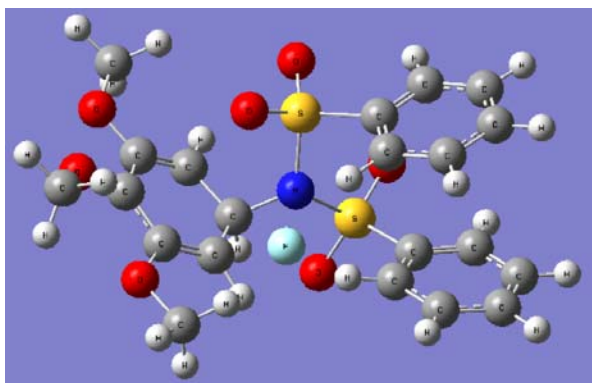

Symbolic Z-matrix: Charge = 0 Multiplicity = 1

|   |          |          |          |
|---|----------|----------|----------|
| C | -3.17156 | 2.94792  | -0.82971 |
| C | -2.16559 | 2.03089  | -1.14542 |
| C | -2.5799  | 0.729    | -1.35253 |
| C | -3.88473 | 0.27258  | -1.27099 |
| C | -4.86271 | 1.21308  | -0.95907 |
| C | -4.50397 | 2.54466  | -0.73908 |
| H | -2.89373 | 3.97873  | -0.65916 |
| H | -1.1085  | 2.35569  | -1.18624 |
| H | -4.11975 | -0.76935 | -1.43424 |
| H | -5.89639 | 0.90399  | -0.88699 |
| H | -5.26952 | 3.27106  | -0.49881 |
| S | -1.28898 | -0.54168 | -1.76087 |
| N | -0.12886 | -0.30808 | -0.34325 |
| O | -1.95716 | -2.00622 | -1.68876 |
| O | -0.38043 | -0.14739 | -3.03354 |
| F | 0.00849  | 1.67443  | 1.9746   |
| S | -0.24902 | -1.4105  | 1.09053  |
| C | -2.02201 | -1.1443  | 1.5268   |
| C | -2.90306 | -2.19083 | 1.33725  |
| C | -2.37468 | 0.1064   | 2.00516  |
| C | -4.24062 | -1.96011 | 1.65707  |
| H | -2.55678 | -3.13275 | 0.93795  |
| C | -3.71457 | 0.31644  | 2.31444  |
| H | -1.63378 | 0.88425  | 2.12261  |
| C | -4.63932 | -0.71562 | 2.14344  |
| H | -4.96408 | -2.75186 | 1.52292  |
| H | -4.03312 | 1.28229  | 2.67939  |
| H | -5.67978 | -0.54493 | 2.38508  |
| O | 0.74031  | -0.66021 | 2.13103  |
| O | 0.03182  | -2.96021 | 0.7683   |
| C | 3.45176  | -0.98325 | -0.58421 |
| C | 3.94838  | 0.20024  | 0.11003  |
| C | 3.06518  | 1.24561  | 0.46122  |

|   |         |          |          |
|---|---------|----------|----------|
| C | 1.73328 | 1.12211  | 0.19169  |
| C | 1.2369  | 0.06673  | -0.70438 |
| C | 2.1631  | -1.0624  | -0.96702 |
| H | 1.00309 | 1.87225  | 0.46045  |
| H | 1.10765 | 0.61332  | -1.66739 |
| H | 1.76942 | -1.90568 | -1.51345 |
| O | 4.40487 | -1.93924 | -0.78923 |
| O | 5.23795 | 0.15824  | 0.36773  |
| O | 3.60427 | 2.32295  | 1.13034  |
| C | 3.98091 | -3.19204 | -1.38013 |
| H | 3.63032 | -3.03694 | -2.40271 |
| H | 4.86856 | -3.81438 | -1.38355 |
| H | 3.19611 | -3.65294 | -0.77676 |
| C | 6.05133 | 1.20269  | 1.00744  |
| H | 5.69075 | 1.3875   | 2.01268  |
| H | 7.04511 | 0.77012  | 1.00995  |
| H | 6.01247 | 2.11178  | 0.41719  |
| C | 2.7372  | 3.48563  | 1.32809  |
| H | 3.41373 | 4.29578  | 1.58     |
| H | 2.16682 | 3.7003   | 0.4205   |
| H | 2.05543 | 3.29459  | 2.15821  |

*trans*-Adduct

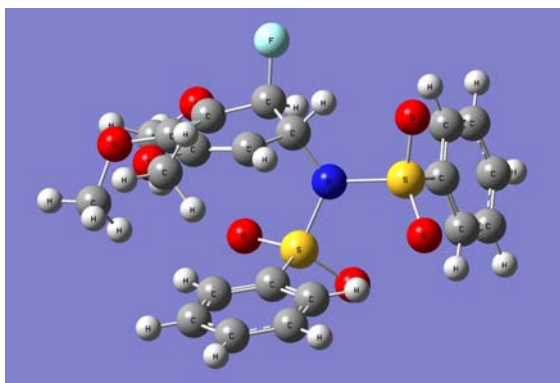

Symbolic Z-matrix: Charge = 0 Multiplicity = 1

|   |          |          |          |
|---|----------|----------|----------|
| C | -4.75696 | -2.16737 | 0.09532  |
| C | -3.75538 | -1.44739 | 0.74119  |
| C | -3.50492 | -0.13886 | 0.33005  |
| C | -4.22812 | 0.46922  | -0.69286 |
| C | -5.2302  | -0.2639  | -1.32296 |
| C | -5.49207 | -1.57668 | -0.93219 |
| H | -4.96491 | -3.18587 | 0.40103  |
| H | -3.18632 | -1.88789 | 1.54964  |
| H | -4.00064 | 1.4837   | -0.98841 |
| H | -5.80428 | 0.19243  | -2.12067 |
| H | -6.27227 | -2.14167 | -1.42959 |
| S | -2.22483 | 0.79387  | 1.17531  |
| N | -0.7231  | 0.38072  | 0.39452  |
| O | -2.45263 | 2.21597  | 0.96182  |
| O | -2.09078 | 0.25478  | 2.52467  |
| S | -0.28152 | 1.08979  | -1.11304 |
| C | 0.71163  | 2.54648  | -0.74213 |
| C | 0.10238  | 3.68279  | -0.21236 |
| C | 2.06642  | 2.519    | -1.06463 |
| C | 0.88367  | 4.81346  | 0.01104  |
| H | -0.95265 | 3.67558  | 0.02676  |
| C | 2.83157  | 3.66244  | -0.84392 |
| H | 2.50064  | 1.62356  | -1.48845 |
| C | 2.24277  | 4.80502  | -0.30401 |
| H | 0.42586  | 5.70377  | 0.42598  |
| H | 3.88483  | 3.66001  | -1.09985 |
| H | 2.84184  | 5.69253  | -0.13405 |
| O | 0.59186  | 0.11033  | -1.75051 |
| O | -1.51696 | 1.52144  | -1.75118 |
| C | 1.4125   | -2.53434 | -0.27156 |
| C | 2.58386  | -1.94904 | 0.03771  |
| C | 2.62268  | -0.78261 | 0.94459  |
| C | 1.50579  | -0.16472 | 1.36729  |
| C | 0.14425  | -0.67997 | 1.01243  |

|   |          |          |          |
|---|----------|----------|----------|
| C | 0.10962  | -2.01534 | 0.2379   |
| H | 1.53499  | 0.66404  | 2.06038  |
| H | -0.37216 | -0.89195 | 1.95092  |
| H | -0.59346 | -1.96507 | -0.59309 |
| O | 1.26614  | -3.58512 | -1.12714 |
| O | 3.76212  | -2.45424 | -0.44262 |
| O | 3.89108  | -0.43855 | 1.28685  |
| C | 1.95133  | -4.80874 | -0.81031 |
| H | 1.63911  | -5.52306 | -1.57109 |
| H | 3.03298  | -4.67521 | -0.83708 |
| H | 1.64159  | -5.16458 | 0.17643  |
| C | 4.3998   | -1.66549 | -1.45911 |
| H | 4.71505  | -0.69846 | -1.06005 |
| H | 5.27619  | -2.2318  | -1.77244 |
| H | 3.7272   | -1.52305 | -2.31005 |
| C | 4.06543  | 0.63498  | 2.20632  |
| H | 5.14012  | 0.73009  | 2.35112  |
| H | 3.66176  | 1.56959  | 1.80427  |
| H | 3.58348  | 0.41022  | 3.1631   |
| F | -0.43318 | -2.99458 | 1.12839  |

## *cis*-Adduct

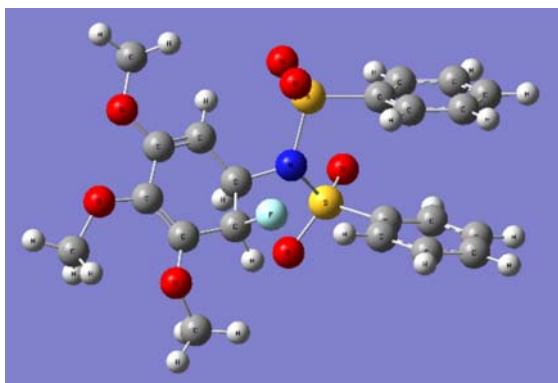

Symbolic Z-matrix: Charge = 0 Multiplicity = 1

|   |          |          |          |
|---|----------|----------|----------|
| C | -3.17156 | 2.94792  | -0.82971 |
| C | -2.16559 | 2.03089  | -1.14542 |
| C | -2.5799  | 0.729    | -1.35253 |
| C | -3.88473 | 0.27258  | -1.27099 |
| C | -4.86271 | 1.21308  | -0.95907 |
| C | -4.50397 | 2.54466  | -0.73908 |
| H | -2.89373 | 3.97873  | -0.65916 |
| H | -1.1085  | 2.35569  | -1.18624 |
| H | -4.11975 | -0.76935 | -1.43424 |
| H | -5.89639 | 0.90399  | -0.88699 |
| H | -5.26952 | 3.27106  | -0.49881 |
| S | -1.28898 | -0.54168 | -1.76087 |
| N | -0.12886 | -0.30808 | -0.34325 |
| O | -1.95716 | -2.00622 | -1.68876 |
| O | -0.38043 | -0.14739 | -3.03354 |
| F | 1.85711  | 0.95509  | 1.49012  |
| S | -0.24902 | -1.4105  | 1.09053  |
| C | -2.02201 | -1.1443  | 1.5268   |
| C | -2.90306 | -2.19083 | 1.33725  |
| C | -2.37468 | 0.1064   | 2.00516  |
| C | -4.24062 | -1.96011 | 1.65707  |
| H | -2.55678 | -3.13275 | 0.93795  |
| C | -3.71457 | 0.31644  | 2.31444  |
| H | -1.63378 | 0.88425  | 2.12261  |
| C | -4.63932 | -0.71562 | 2.14344  |
| H | -4.96408 | -2.75186 | 1.52292  |
| H | -4.03312 | 1.28229  | 2.67939  |
| H | -5.67978 | -0.54493 | 2.38508  |
| O | 0.74031  | -0.66021 | 2.13103  |
| O | 0.03182  | -2.96021 | 0.7683   |
| C | 3.45176  | -0.98325 | -0.58421 |
| C | 3.94838  | 0.20024  | 0.11003  |
| C | 3.06518  | 1.24561  | 0.46122  |

|   |         |          |          |
|---|---------|----------|----------|
| C | 1.73328 | 1.12211  | 0.19169  |
| C | 1.2369  | 0.06673  | -0.70438 |
| C | 2.1631  | -1.0624  | -0.96702 |
| H | 1.00309 | 1.87225  | 0.46045  |
| H | 1.10765 | 0.61332  | -1.66739 |
| H | 1.76942 | -1.90568 | -1.51345 |
| O | 4.40487 | -1.93924 | -0.78923 |
| O | 5.23795 | 0.15824  | 0.36773  |
| O | 3.60427 | 2.32295  | 1.13034  |
| C | 3.98091 | -3.19204 | -1.38013 |
| H | 3.63032 | -3.03694 | -2.40271 |
| H | 4.86856 | -3.81438 | -1.38355 |
| H | 3.19611 | -3.65294 | -0.77676 |
| C | 6.05133 | 1.20269  | 1.00744  |
| H | 5.69075 | 1.3875   | 2.01268  |
| H | 7.04511 | 0.77012  | 1.00995  |
| H | 6.01247 | 2.11178  | 0.41719  |
| C | 2.7372  | 3.48563  | 1.32809  |
| H | 3.41373 | 4.29578  | 1.58     |
| H | 2.16682 | 3.7003   | 0.4205   |
| H | 2.05543 | 3.29459  | 2.15821  |

## Adduct II'

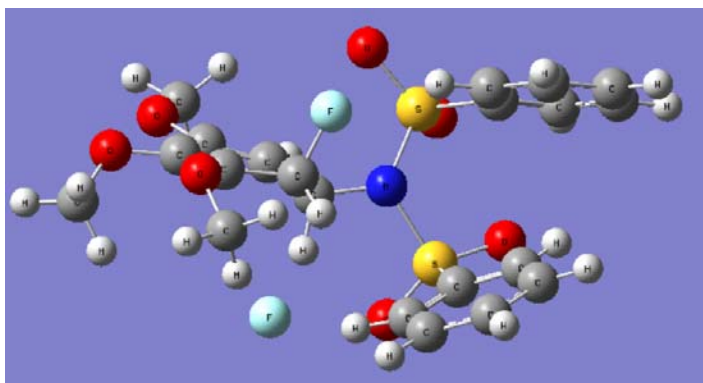

Symbolic Z-matrix: Charge = -1 Multiplicity = 1

|   |          |          |          |
|---|----------|----------|----------|
| C | -3.17156 | 2.94792  | -0.82971 |
| C | -2.16559 | 2.03089  | -1.14542 |
| C | -2.5799  | 0.729    | -1.35253 |
| C | -3.88473 | 0.27258  | -1.27099 |
| C | -4.86271 | 1.21308  | -0.95907 |
| C | -4.50397 | 2.54466  | -0.73908 |
| H | -2.89373 | 3.97873  | -0.65916 |
| H | -1.1085  | 2.35569  | -1.18624 |
| H | -4.11975 | -0.76935 | -1.43424 |
| H | -5.89639 | 0.90399  | -0.88699 |
| H | -5.26952 | 3.27106  | -0.49881 |
| S | -1.28898 | -0.54168 | -1.76087 |
| N | -0.12886 | -0.30808 | -0.34325 |
| O | -1.95716 | -2.00622 | -1.68876 |
| O | -0.38043 | -0.14739 | -3.03354 |
| F | 1.85711  | 0.95509  | 1.49012  |
| S | -0.24902 | -1.4105  | 1.09053  |
| C | -2.02201 | -1.1443  | 1.5268   |
| C | -2.90306 | -2.19083 | 1.33725  |
| C | -2.37468 | 0.1064   | 2.00516  |
| C | -4.24062 | -1.96011 | 1.65707  |
| H | -2.55678 | -3.13275 | 0.93795  |
| C | -3.71457 | 0.31644  | 2.31444  |
| H | -1.63378 | 0.88425  | 2.12261  |
| C | -4.63932 | -0.71562 | 2.14344  |
| H | -4.96408 | -2.75186 | 1.52292  |
| H | -4.03312 | 1.28229  | 2.67939  |
| H | -5.67978 | -0.54493 | 2.38508  |
| O | 0.74031  | -0.66021 | 2.13103  |
| O | 0.03182  | -2.96021 | 0.7683   |
| C | 3.45176  | -0.98325 | -0.58421 |
| C | 3.94838  | 0.20024  | 0.11003  |
| C | 3.06518  | 1.24561  | 0.46122  |



|   |         |          |          |
|---|---------|----------|----------|
| C | 1.73328 | 1.12211  | 0.19169  |
| C | 1.2369  | 0.06673  | -0.70438 |
| C | 2.1631  | -1.0624  | -0.96702 |
| H | 1.00309 | 1.87225  | 0.46045  |
| H | 1.10765 | 0.61332  | -1.66739 |
| H | 1.76942 | -1.90568 | -1.51345 |
| O | 4.40487 | -1.93924 | -0.78923 |
| O | 5.23795 | 0.15824  | 0.36773  |
| O | 3.60427 | 2.32295  | 1.13034  |
| C | 3.98091 | -3.19204 | -1.38013 |
| H | 3.63032 | -3.03694 | -2.40271 |
| H | 4.86856 | -3.81438 | -1.38355 |
| H | 3.19611 | -3.65294 | -0.77676 |
| C | 6.05133 | 1.20269  | 1.00744  |
| H | 5.69075 | 1.3875   | 2.01268  |
| H | 7.04511 | 0.77012  | 1.00995  |
| H | 6.01247 | 2.11178  | 0.41719  |
| C | 2.7372  | 3.48563  | 1.32809  |
| H | 3.41373 | 4.29578  | 1.58     |
| H | 2.16682 | 3.7003   | 0.4205   |
| H | 2.05543 | 3.29459  | 2.15821  |
| F | 0.91055 | 1.44682  | -3.13587 |

# TS3

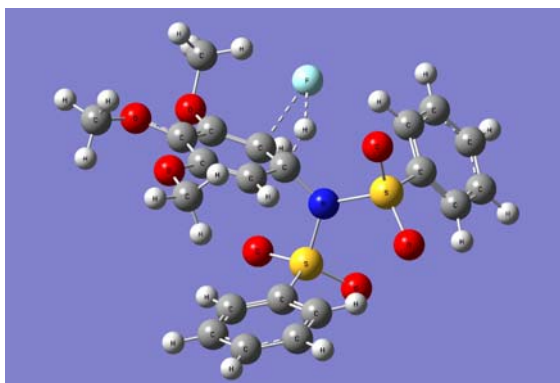

Symbolic Z-matrix: Charge = 0 Multiplicity = 1

|   |          |          |          |
|---|----------|----------|----------|
| C | -4.08278 | -3.03984 | 0.15337  |
| C | -3.07957 | -2.20247 | 0.63692  |
| C | -3.29507 | -0.8255  | 0.57093  |
| C | -4.45776 | -0.26841 | 0.0425   |
| C | -5.44792 | -1.12652 | -0.42777 |
| C | -5.26095 | -2.50734 | -0.37022 |
| H | -3.93634 | -4.11301 | 0.18862  |
| H | -2.14475 | -2.61394 | 1.01328  |
| H | -4.57569 | 0.80577  | 0.00125  |
| H | -6.3615  | -0.71464 | -0.84013 |
| H | -6.03514 | -3.17076 | -0.73956 |
| S | -2.04595 | 0.27995  | 1.22486  |
| N | -0.72156 | 0.23531  | 0.07874  |
| O | -2.5626  | 1.64278  | 1.21294  |
| O | -1.47322 | -0.28769 | 2.43771  |
| S | -0.70226 | 1.23571  | -1.32862 |
| C | -0.0315  | 2.83329  | -0.83451 |
| C | -0.86585 | 3.77923  | -0.24188 |
| C | 1.30817  | 3.10226  | -1.11102 |
| C | -0.3315  | 5.02016  | 0.09513  |
| H | -1.90124 | 3.54165  | -0.0426  |
| C | 1.8262   | 4.34959  | -0.76912 |
| H | 1.91786  | 2.35534  | -1.60213 |
| C | 1.00909  | 5.30458  | -0.16512 |
| H | -0.96706 | 5.76634  | 0.55724  |
| H | 2.86291  | 4.57813  | -0.98808 |
| H | 1.41509  | 6.27557  | 0.09525  |
| O | 0.28851  | 0.60664  | -2.19873 |
| O | -2.0843  | 1.41098  | -1.74302 |
| C | 2.02233  | -2.11825 | -0.80017 |
| C | 3.09001  | -1.51683 | -0.11647 |
| C | 2.84406  | -0.41985 | 0.81195  |
| C | 1.58454  | 0.04331  | 0.99559  |
| C | 0.43004  | -0.61885 | 0.36589  |

|   |          |          |          |
|---|----------|----------|----------|
| C | 0.72925  | -1.65801 | -0.62431 |
| H | 1.36669  | 0.83292  | 1.70002  |
| H | 0.07116  | -1.42644 | 1.11783  |
| H | -0.05413 | -2.019   | -1.2707  |
| O | 2.2706   | -3.11978 | -1.68982 |
| O | 4.27827  | -2.05507 | -0.34791 |
| O | 3.94796  | 0.03112  | 1.47269  |
| C | 2.08544  | -4.4505  | -1.1499  |
| H | 2.06038  | -5.11841 | -2.00965 |
| H | 2.93014  | -4.71133 | -0.50508 |
| H | 1.15461  | -4.50326 | -0.58117 |
| C | 5.55245  | -1.40499 | -0.15041 |
| H | 5.83498  | -1.42085 | 0.89963  |
| H | 6.24616  | -1.99763 | -0.74362 |
| H | 5.52459  | -0.37981 | -0.51673 |
| C | 3.76055  | 1.02574  | 2.47914  |
| H | 4.74694  | 1.20781  | 2.90118  |
| H | 3.36824  | 1.95231  | 2.04892  |
| H | 3.08459  | 0.66588  | 3.26063  |
| F | -0.13814 | -3.03637 | 0.8523   |

TS3`

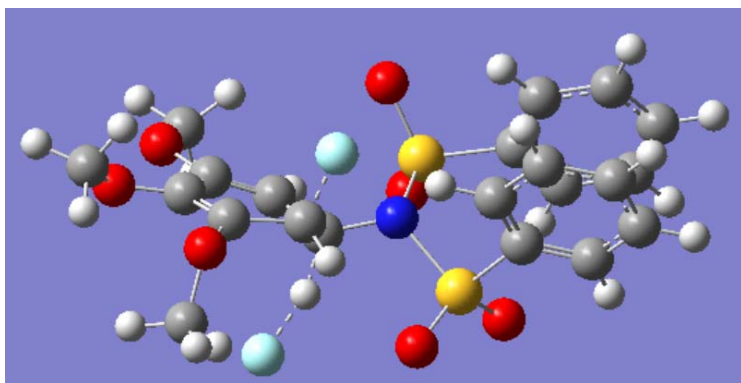

Symbolic Z-matrix: Charge = -1 Multiplicity = 1

|   |          |          |          |
|---|----------|----------|----------|
| C | -2.6502  | -2.56936 | -1.92613 |
| C | -1.79512 | -1.96975 | -1.00311 |
| C | -2.34185 | -1.5642  | 0.20261  |
| C | -3.67395 | -1.72198 | 0.53739  |
| C | -4.51272 | -2.3263  | -0.39757 |
| C | -4.00071 | -2.7497  | -1.62355 |
| H | -2.25386 | -2.89104 | -2.87974 |
| H | -0.75214 | -1.79041 | -1.23663 |
| H | -4.03731 | -1.36405 | 1.49021  |
| H | -5.56175 | -2.45909 | -0.16858 |
| H | -4.65621 | -3.21869 | -2.34649 |
| S | -1.21138 | -0.85374 | 1.49817  |
| N | -0.17703 | 0.22439  | 0.35221  |
| O | -2.1618  | -0.09615 | 2.5722   |
| O | -0.2267  | -2.01769 | 2.00797  |
| F | 1.08175  | -1.11578 | -1.814   |
| S | -0.88891 | 1.8845   | 0.03143  |
| C | -2.68963 | 1.55071  | -0.23585 |
| C | -3.57164 | 1.83013  | 0.78941  |
| C | -3.06952 | 1.09947  | -1.48811 |
| C | -4.9288  | 1.62699  | 0.54102  |
| H | -3.20036 | 2.17105  | 1.74384  |
| C | -4.42687 | 0.89763  | -1.71673 |
| H | -2.32286 | 0.91873  | -2.24826 |
| C | -5.35078 | 1.16256  | -0.70399 |
| H | -5.64917 | 1.82966  | 1.3217   |
| H | -4.75855 | 0.52971  | -2.67776 |
| H | -6.40566 | 1.00203  | -0.88663 |
| O | -0.30815 | 2.35421  | -1.40271 |
| O | -0.75422 | 2.90048  | 1.2807   |
| C | 3.27295  | 1.3315   | -0.25462 |
| C | 3.93828  | 0.04884  | -0.50274 |
| C | 3.23988  | -1.09642 | -0.4048  |

|   |         |          |          |
|---|---------|----------|----------|
| C | 1.77073 | -1.08298 | -0.26022 |
| C | 1.29087 | 0.10942  | 0.52728  |
| C | 2.03187 | 1.37591  | 0.24414  |
| H | 1.41143 | -2.00892 | 0.1788   |
| H | 1.66186 | -0.2172  | 1.6272   |
| H | 1.59228 | 2.31132  | 0.54938  |
| O | 4.05966 | 2.44127  | -0.52034 |
| O | 5.29242 | 0.13086  | -0.72212 |
| O | 3.85399 | -2.35144 | -0.37332 |
| C | 3.4607  | 3.72652  | -0.28414 |
| H | 3.2439  | 3.86963  | 0.77844  |
| H | 4.20002 | 4.4533   | -0.60955 |
| H | 2.53815 | 3.83968  | -0.86064 |
| C | 5.9308  | -0.87515 | -1.54355 |
| H | 5.29469 | -1.13009 | -2.39277 |
| H | 6.85576 | -0.41373 | -1.88243 |
| H | 6.13761 | -1.7812  | -0.97769 |
| C | 4.24735 | -2.74017 | 0.99572  |
| H | 4.13884 | -3.82185 | 1.04751  |
| H | 5.29163 | -2.45708 | 1.15598  |
| H | 3.61355 | -2.22533 | 1.72983  |
| F | 2.5563  | -0.71918 | 2.64179  |

## Products

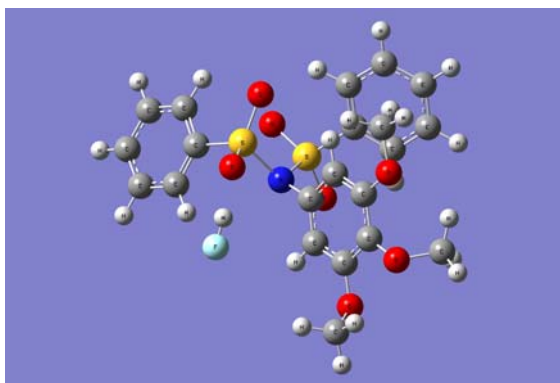

Symbolic Z-matrix: Charge = 0 Multiplicity = 1

|   |          |          |          |
|---|----------|----------|----------|
| C | -0.60514 | -0.38169 | -0.36246 |
| C | 0.39955  | 0.4198   | 0.17376  |
| C | 0.22204  | 1.80349  | 0.16062  |
| C | -0.92282 | 2.40095  | -0.36282 |
| C | -1.91664 | 1.58184  | -0.89073 |
| C | -1.75756 | 0.19656  | -0.89332 |
| H | -0.48685 | -1.45868 | -0.35571 |
| H | 1.28509  | -0.02896 | 0.60478  |
| H | -1.02258 | 3.47705  | -0.36206 |
| H | -2.8143  | 2.02908  | -1.30078 |
| H | -2.53569 | -0.43479 | -1.30694 |
| S | 1.49612  | 2.85561  | 0.85925  |
| N | 2.66387  | 3.11833  | -0.39188 |
| O | 0.91476  | 4.13578  | 1.23018  |
| O | 2.22895  | 2.08563  | 1.8719   |
| S | 2.38132  | 4.26848  | -1.66557 |
| C | 3.15737  | 5.78979  | -1.10663 |
| C | 2.49215  | 6.59778  | -0.18529 |
| C | 4.39822  | 6.13773  | -1.63657 |
| C | 3.09984  | 7.78323  | 0.21862  |
| H | 1.52993  | 6.29796  | 0.20815  |
| C | 4.99099  | 7.32892  | -1.2222  |
| H | 4.87482  | 5.49378  | -2.36408 |
| C | 4.34447  | 8.14747  | -0.29723 |
| H | 2.59718  | 8.42456  | 0.933    |
| H | 5.95261  | 7.61861  | -1.6295  |
| H | 4.80835  | 9.0749   | 0.01912  |
| O | 3.13336  | 3.77834  | -2.80945 |
| O | 0.93902  | 4.45721  | -1.7231  |
| C | 5.31839  | 0.59633  | -1.04859 |
| C | 6.36684  | 1.08911  | -0.26027 |
| C | 6.16608  | 2.25119  | 0.51589  |
| C | 4.94575  | 2.9204   | 0.46468  |
| C | 3.92278  | 2.42086  | -0.34647 |

|   |         |          |          |
|---|---------|----------|----------|
| C | 4.09621 | 1.26723  | -1.09809 |
| H | 4.76481 | 3.80632  | 1.05525  |
| H | 2.90963 | 0.53812  | 2.07733  |
| H | 3.30867 | 0.88924  | -1.73543 |
| O | 5.48333 | -0.51481 | -1.82956 |
| O | 7.544   | 0.39812  | -0.20443 |
| O | 7.22269 | 2.64092  | 1.28029  |
| C | 5.62941 | -1.76079 | -1.12491 |
| H | 5.69455 | -2.52932 | -1.89418 |
| H | 6.53481 | -1.76215 | -0.5162  |
| H | 4.75475 | -1.9427  | -0.493   |
| C | 8.66507 | 1.01547  | -0.85556 |
| H | 8.91221 | 1.96975  | -0.38601 |
| H | 9.49737 | 0.32257  | -0.73853 |
| H | 8.4542  | 1.15911  | -1.91972 |
| C | 7.04406 | 3.73441  | 2.17528  |
| H | 7.98492 | 3.8304   | 2.71424  |
| H | 6.83821 | 4.66414  | 1.63455  |
| H | 6.23562 | 3.53476  | 2.88541  |
| F | 3.17717 | -0.36395 | 2.10299  |

#### 4. References

- (1) Sakakibara, Y.; Ito, E.; Fukushima, T.; Murakami, K.; Itami, K., Late-Stage Functionalization of Arylacetic Acids by Photoredox-Catalyzed Decarboxylative Carbon–Heteroatom Bond Formation. *Chemistry – A European Journal* **2018**, *24*, 9254-9258.
- (2) Hernández, J. G.; Ardila-Fierro, K. J.; Barišić, D.; Geneste, H., Multi-faceted reactivity of *N*-fluorobenzenesulfonimide (NFSI) under mechanochemical conditions: fluorination, fluorodemethylation, sulfonylation, and amidation reactions. *Beilstein Journal of Organic Chemistry* **2022**, *18*, 182-189.
- (3) Stavber, G.; Zupan, M.; Jereb, M.; Stavber, S., Selective and Effective Fluorination of Organic Compounds in Water Using Selectfluor F-TEDA-BF<sub>4</sub>. *Org. Lett.* **2004**, *6*, 4973-4976.
- (4) M. J. Frisch, G. W. T., H. B. Schlegel, G. E. Scuseria, M. A. Robb, J. R. Cheeseman, G. Scalmani, V. Barone, B. Mennucci, G. A. Petersson, H. Nakatsuji, M. Caricato, X. Li, H. P. Hratchian, A. F. Izmaylov, J. Bloino, G. Zheng, J. L. Sonnenberg, M. Hada, M. Ehara, K. Toyota, R. Fukuda, J. Hasegawa, M. Ishida, T. Nakajima, Y. Honda, O. Kitao, H. Nakai, T. Vreven, J. A. Montgomery, Jr., J. E. Peralta, F. Ogliaro, M. Bearpark, J. J. Heyd, E. Brothers, K. N. Kudin, V. N. Staroverov, T. Keith, R. Kobayashi, J. Normand, K. Raghavachari, A. Rendell, J. C. Burant, S. S. Iyengar, J. Tomasi, M. Cossi, N. Rega, J. M. Millam, M. Klene, J. E. Knox, J. B. Cross, V. Bakken, C. Adamo, J. Jaramillo, R. Gomperts, R. E. Stratmann, O. Yazyev, A. J. Austin, R. Cammi, C. Pomelli, J. W. Ochterski, R. L. Martin, K. Morokuma, V. G. Zakrzewski, G. A. Voth, P. Salvador, J. J. Dannenberg, S. Dapprich, A. D. Daniels, O. Farkas, J. B. Foresman, J. V. Ortiz, J. Cioslowski, and D. J. Fox, , *Gaussian, Inc., Wallingford CT, 2013*.
- (5) Lu, T.; Chen, Q., Shermo: A general code for calculating molecular thermochemistry properties. *Computational and Theoretical Chemistry* **2021**, *1200*, 113249.



### $^1\text{H}$ NMR of **7a**

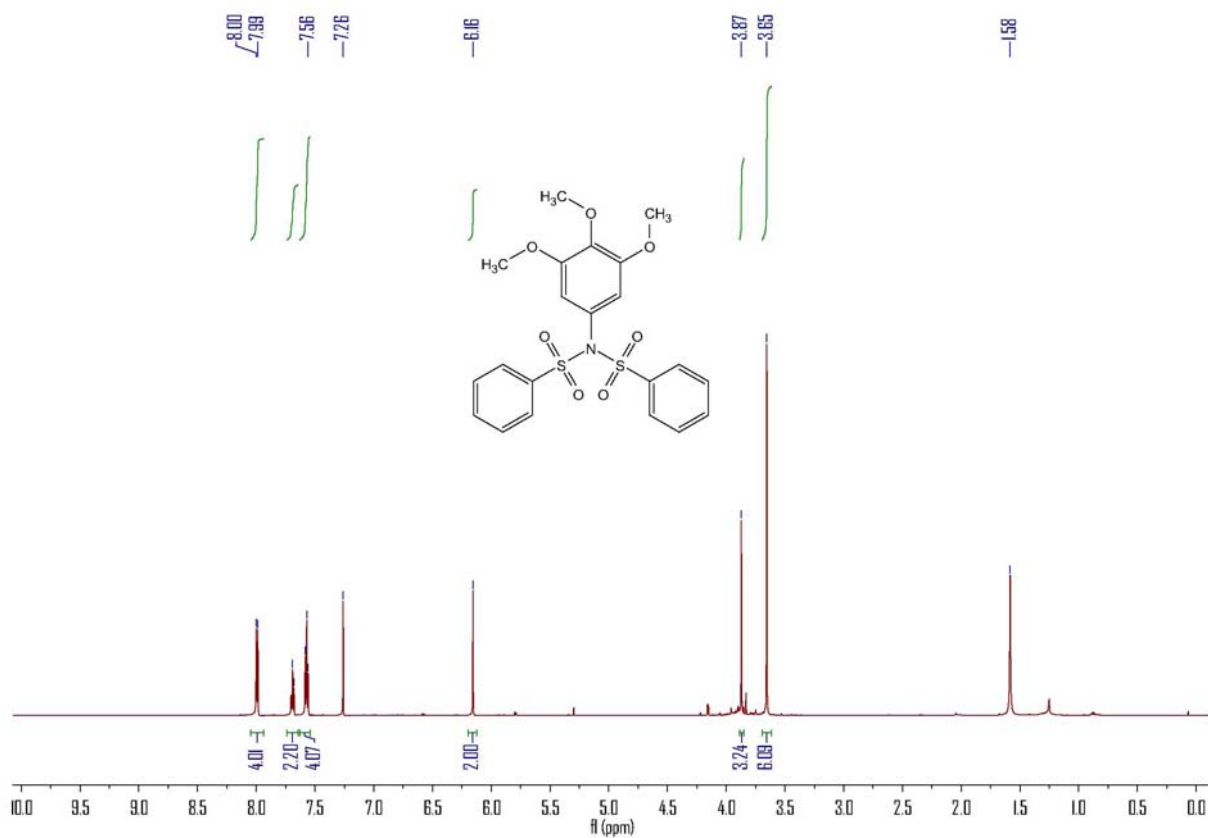

### $^{13}\text{C}$ NMR of **7a**

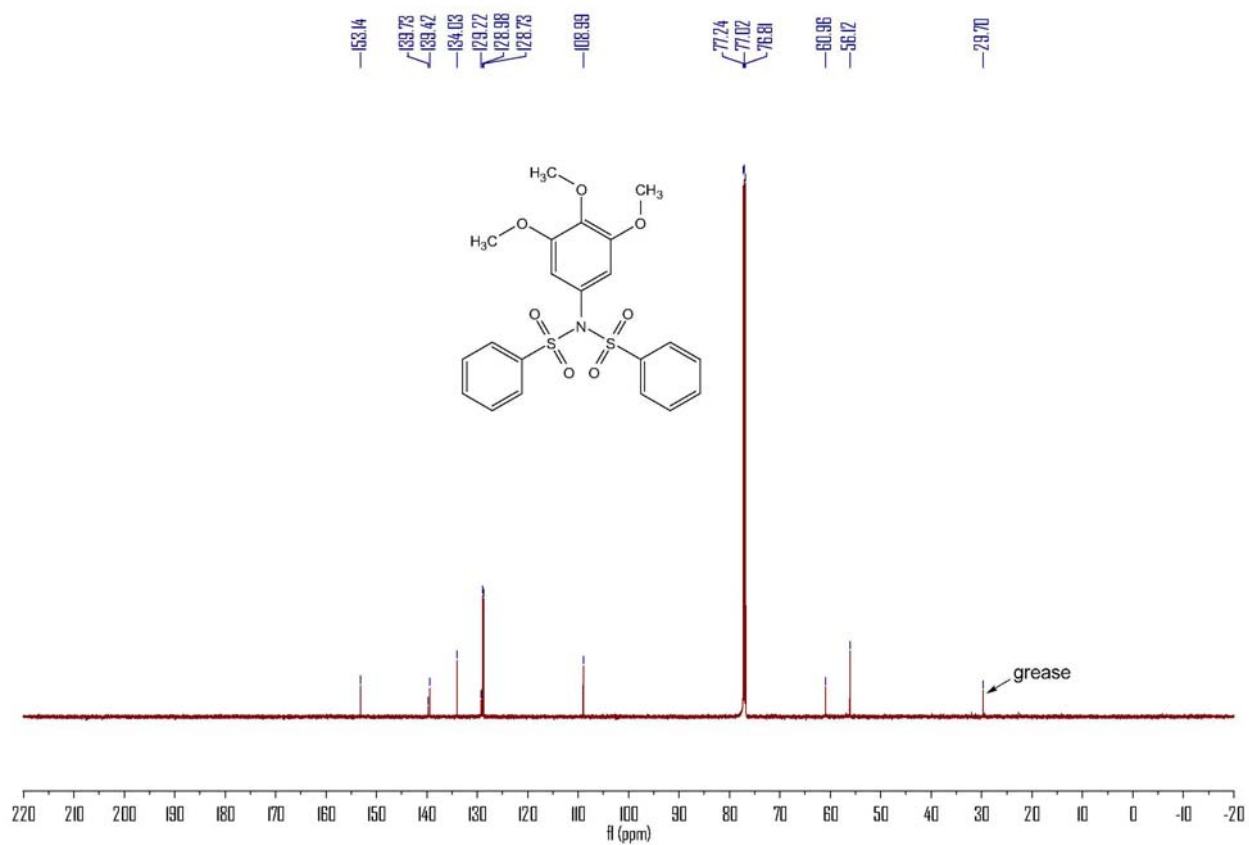

### <sup>1</sup>H NMR of 7b

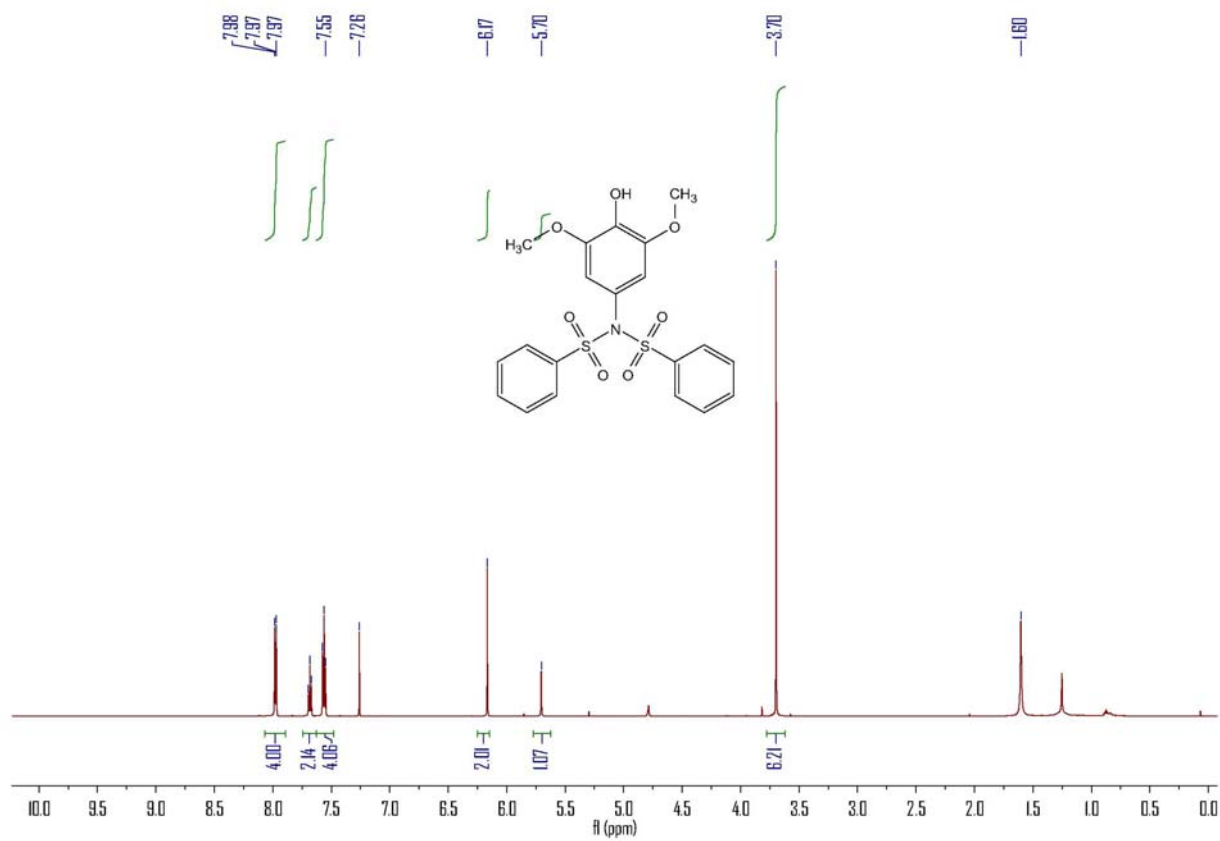

### <sup>13</sup>C NMR of 7b

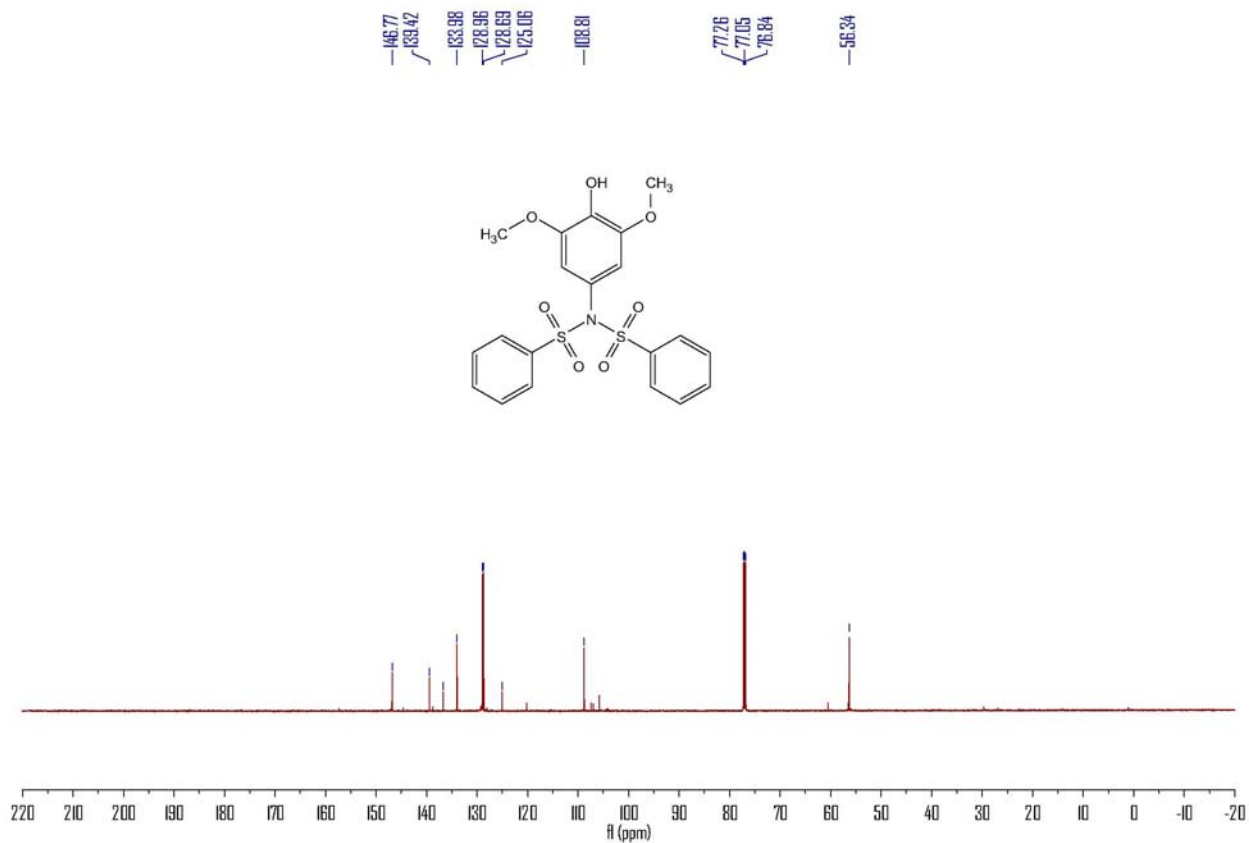

### $^1\text{H}$ NMR of 7c

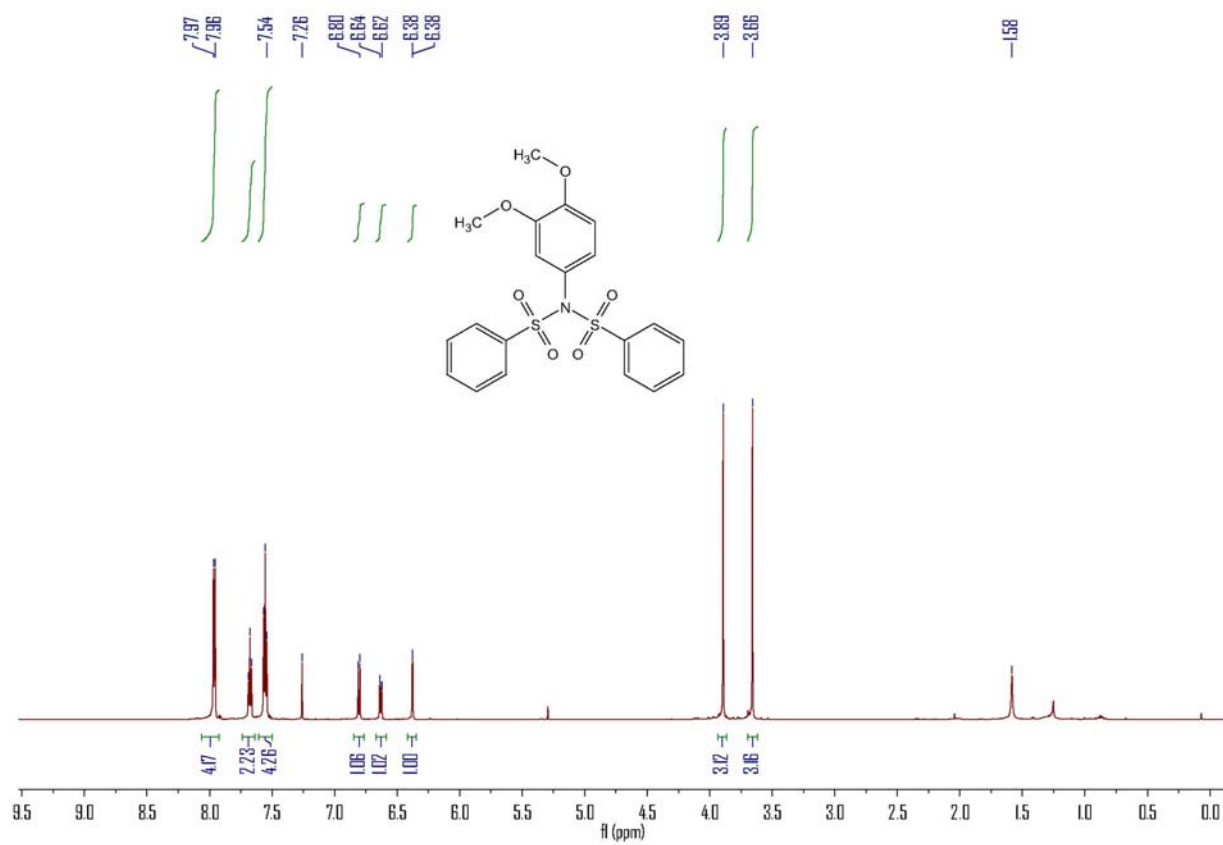

### $^{13}\text{C}$ NMR of 7c

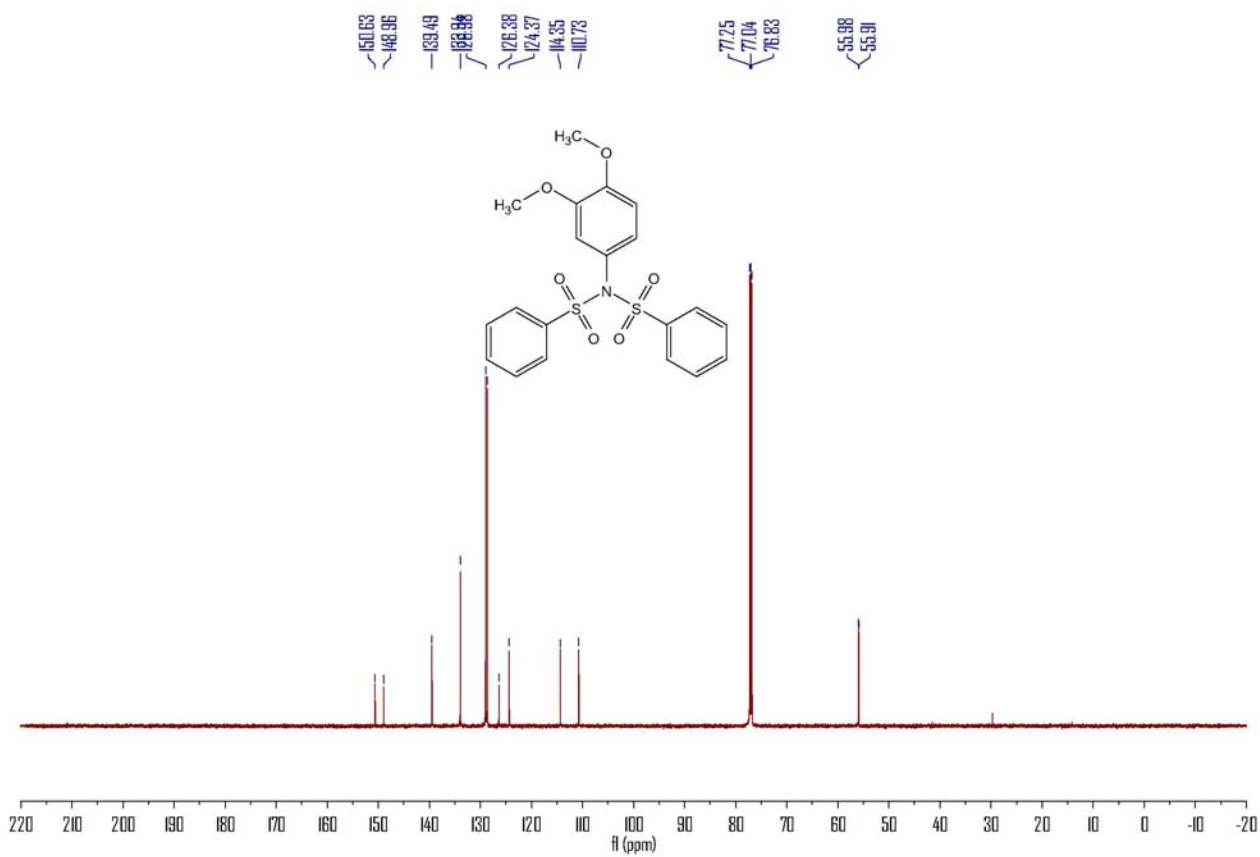

### $^1\text{H}$ NMR of 7d

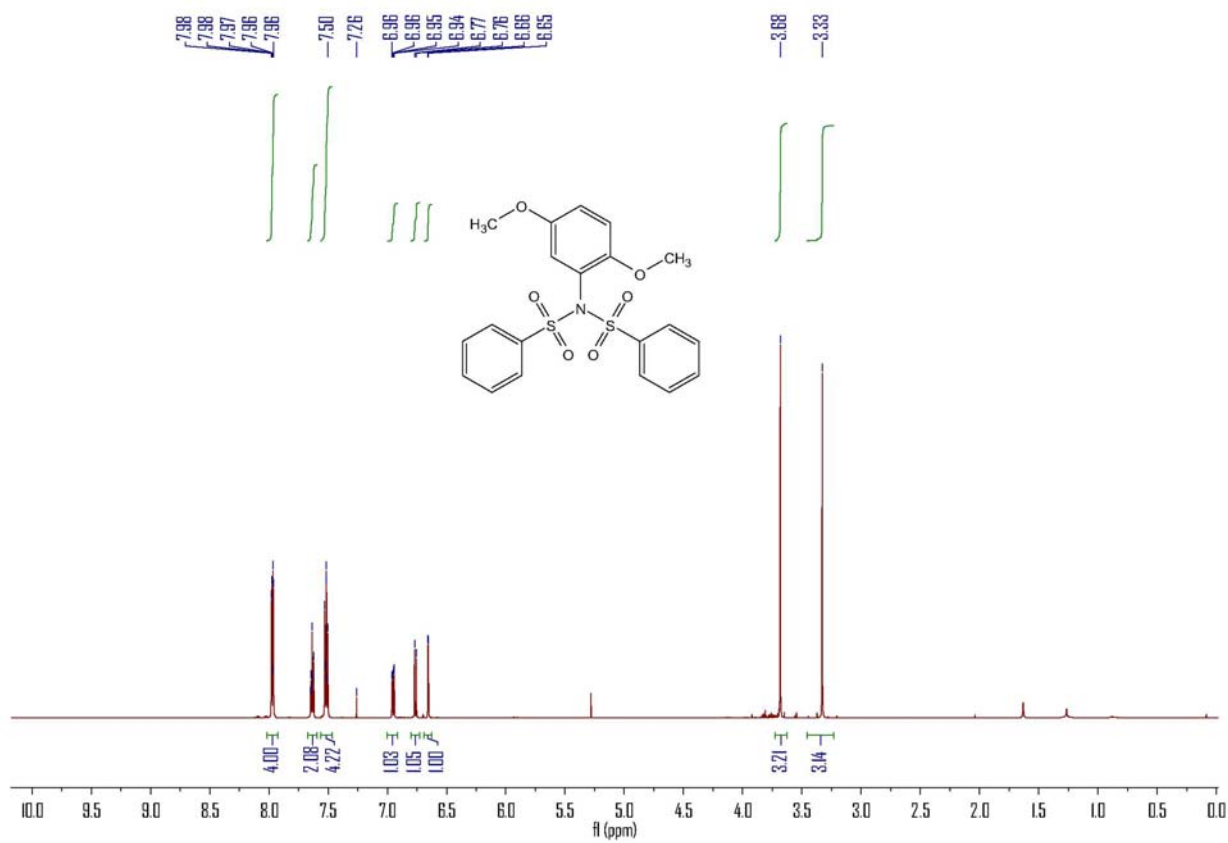

### $^{13}\text{C}$ NMR of 7d

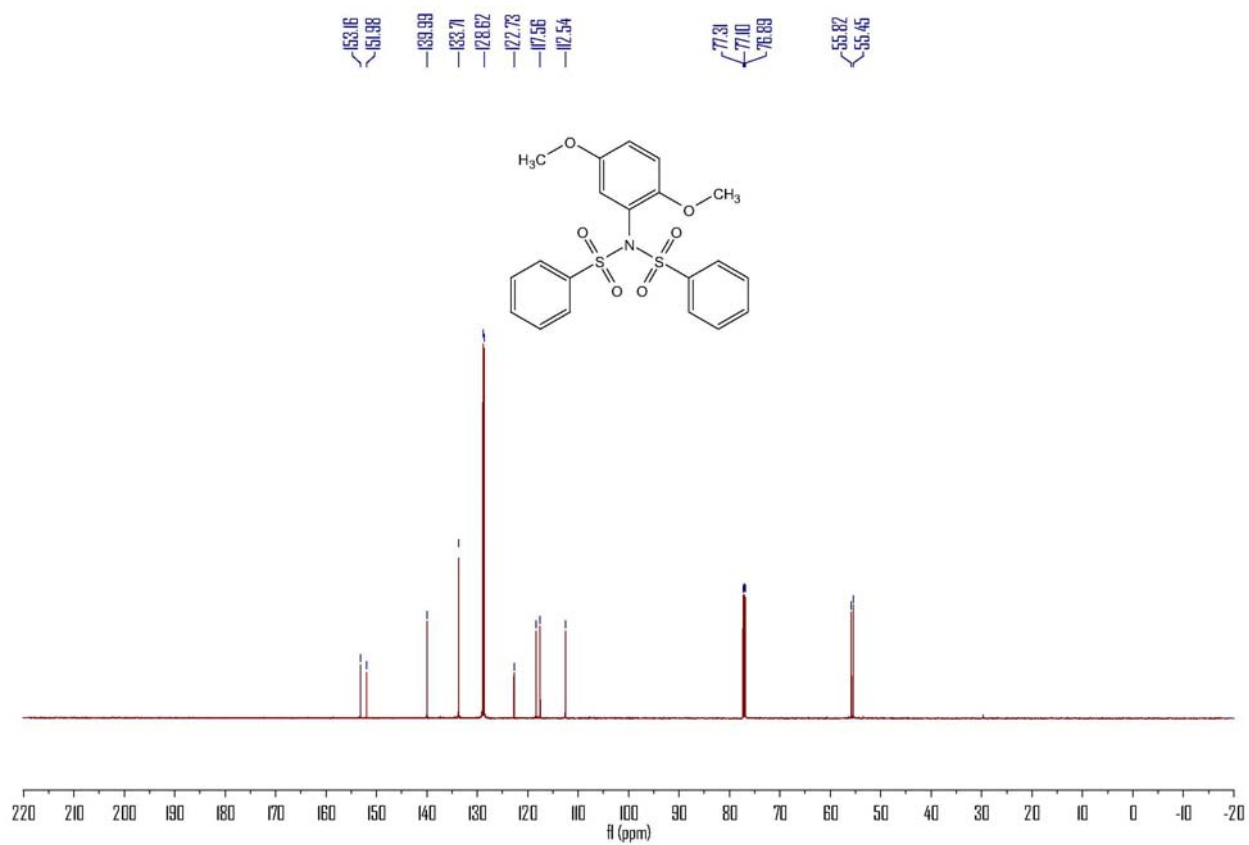

### $^1\text{H}$ NMR of **7e** ( $\text{CDCl}_3$ )

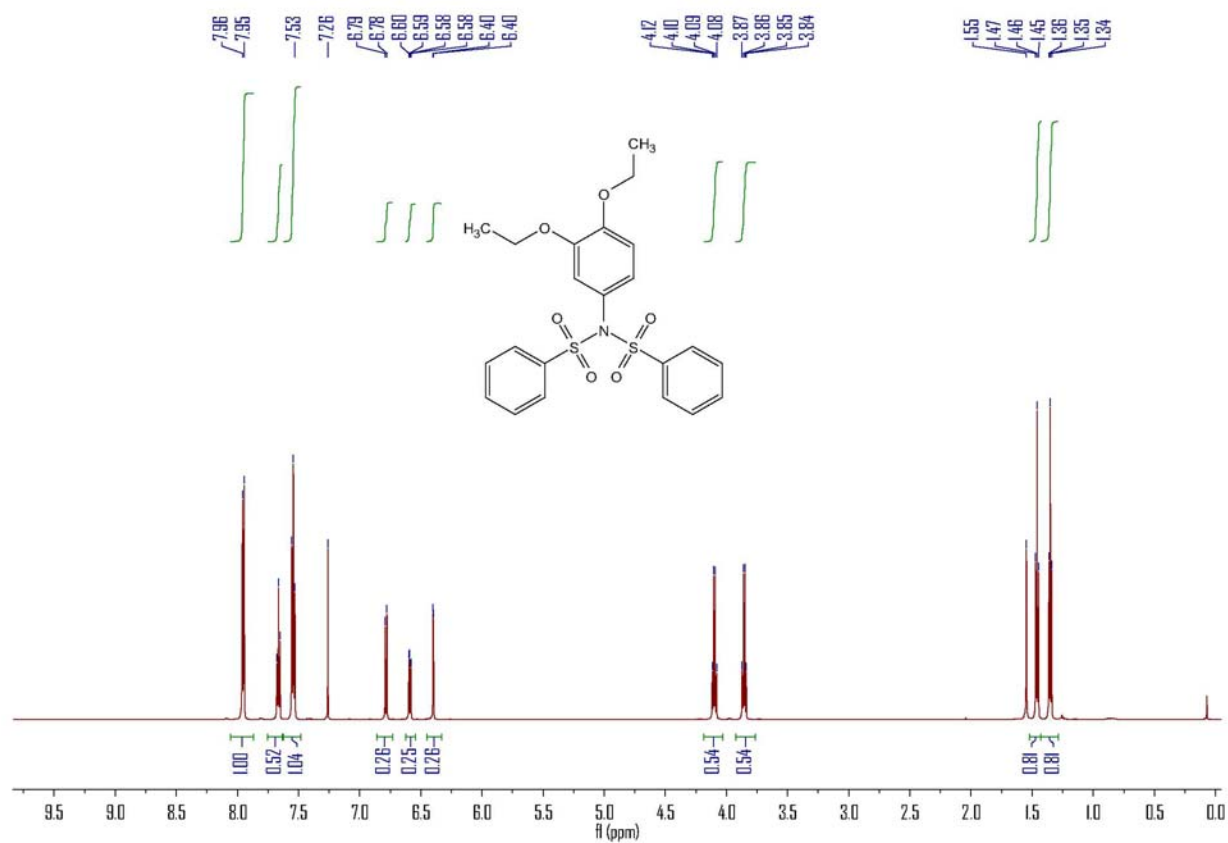

### $^{13}\text{C}$ NMR of **7e** ( $\text{CDCl}_3$ )

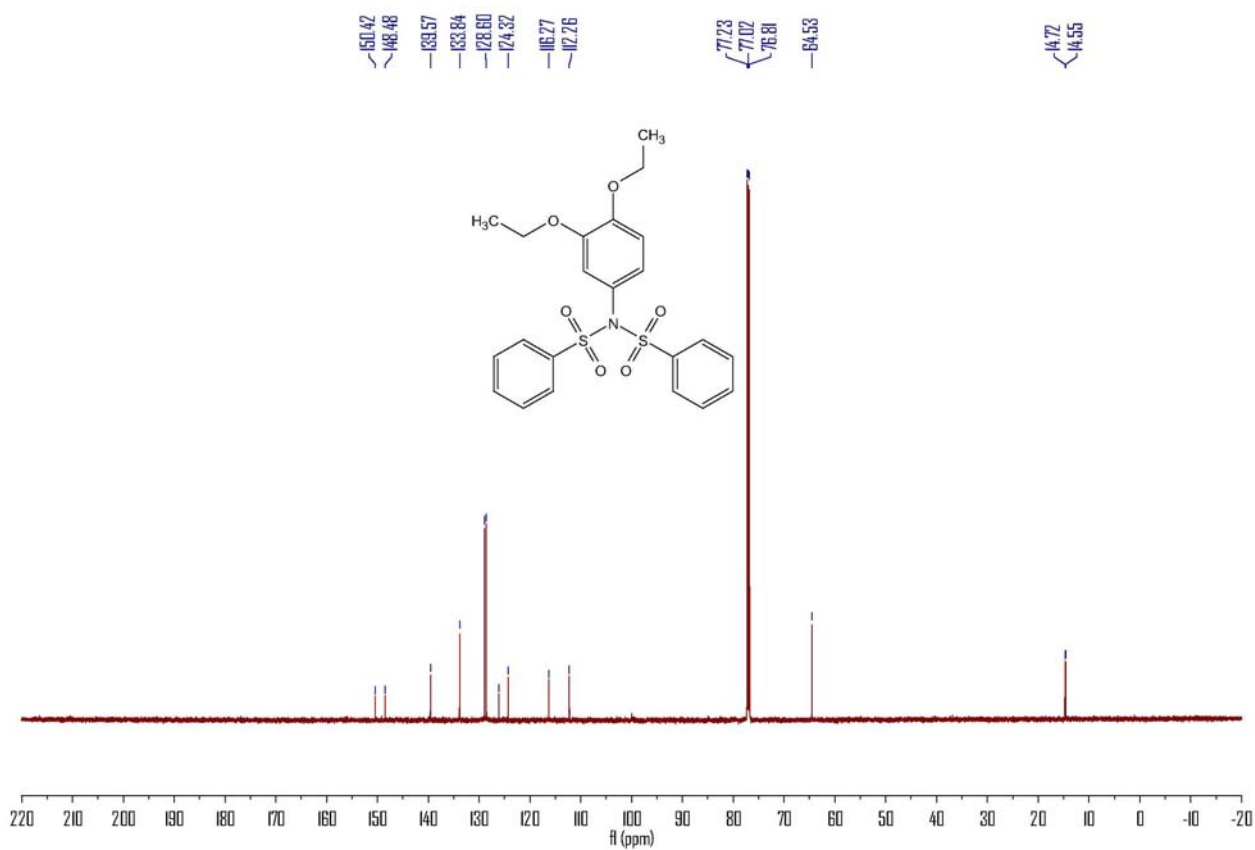

### $^1\text{H}$ NMR of 7e (DMSO-*d*<sub>6</sub>)

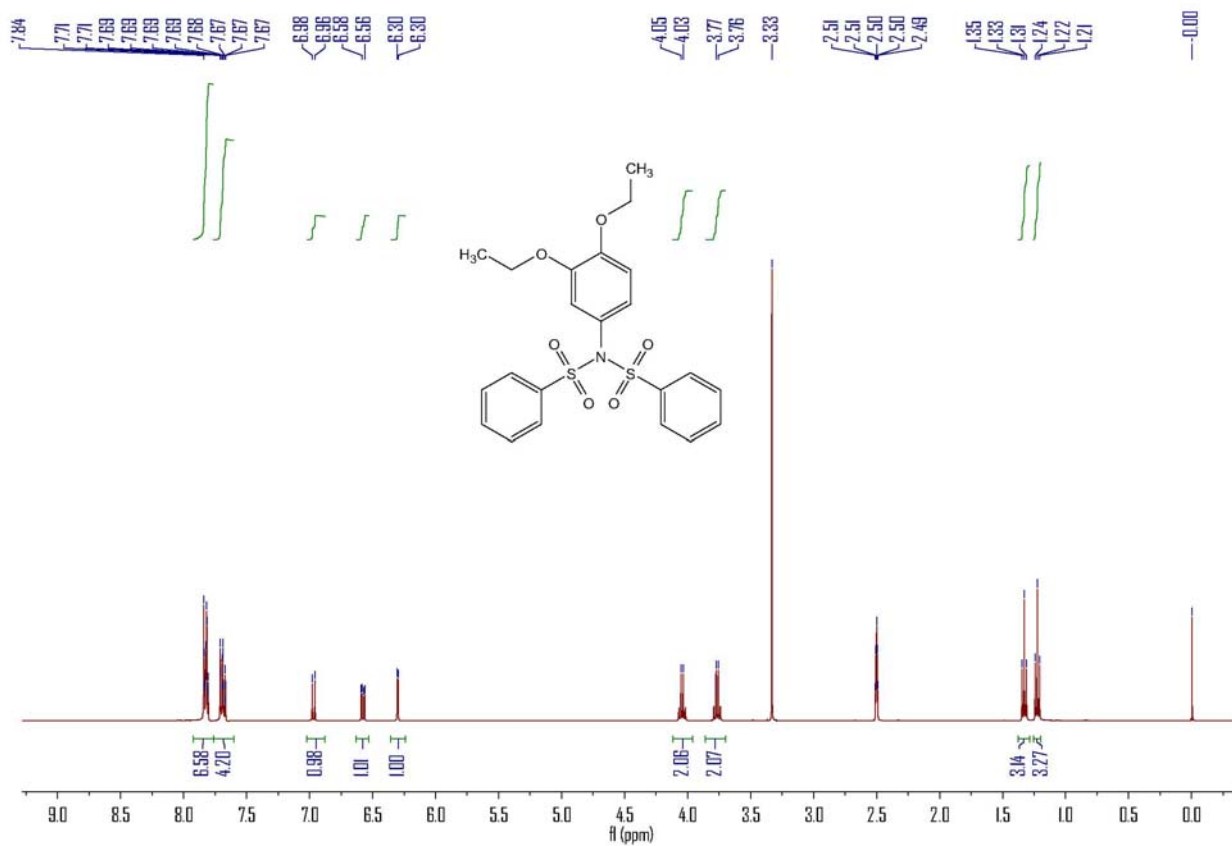

### $^{13}\text{C}$ NMR of 7e (DMSO-*d*<sub>6</sub>)

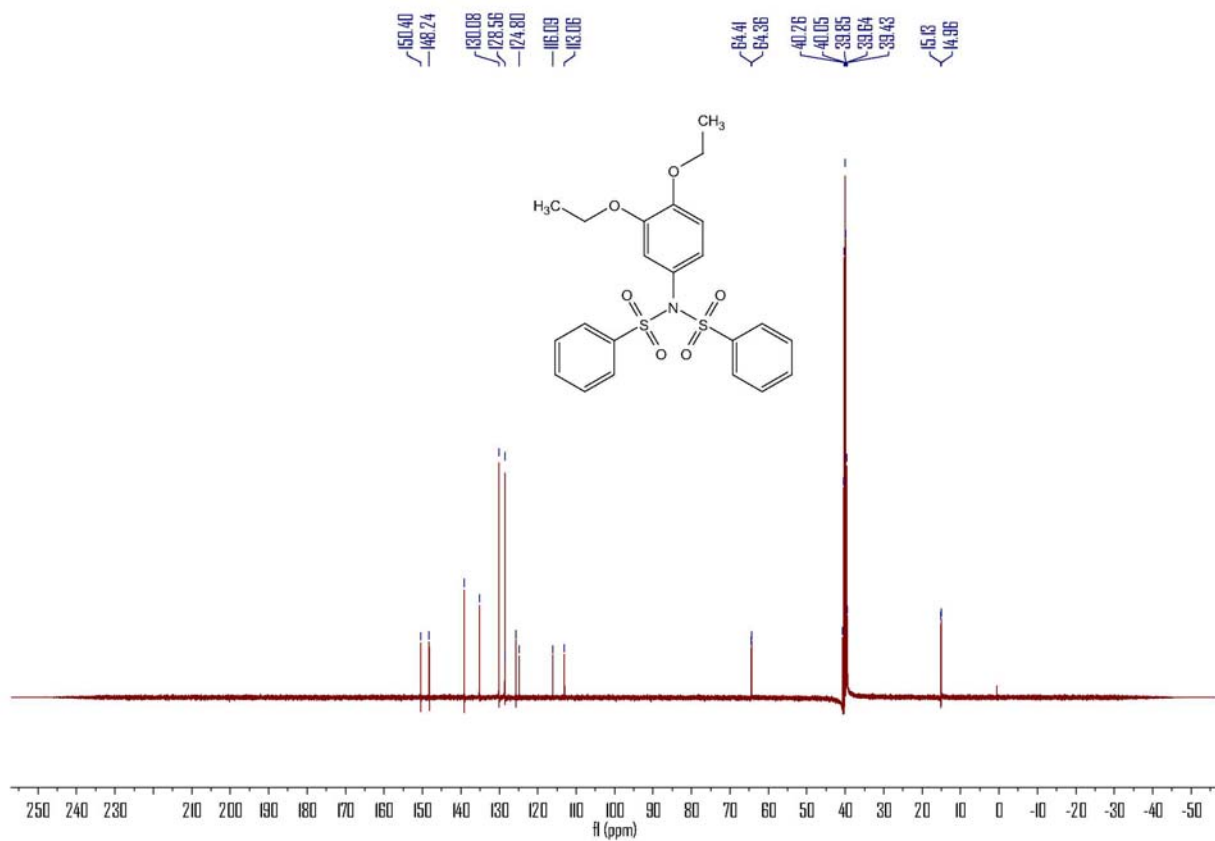

### $^1\text{H}$ NMR of **7f** ( $\text{CDCl}_3$ )

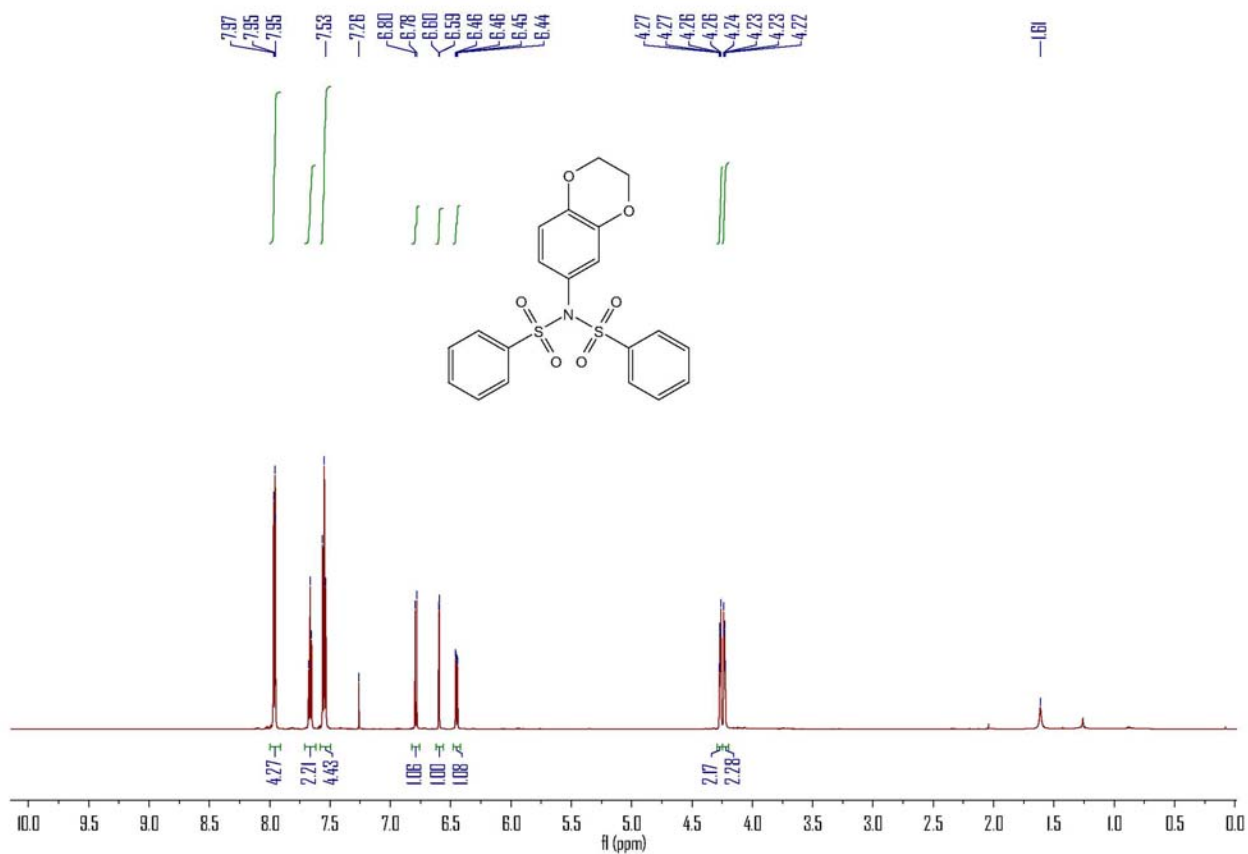

### $^{13}\text{C}$ NMR of **7f** ( $\text{CDCl}_3$ )

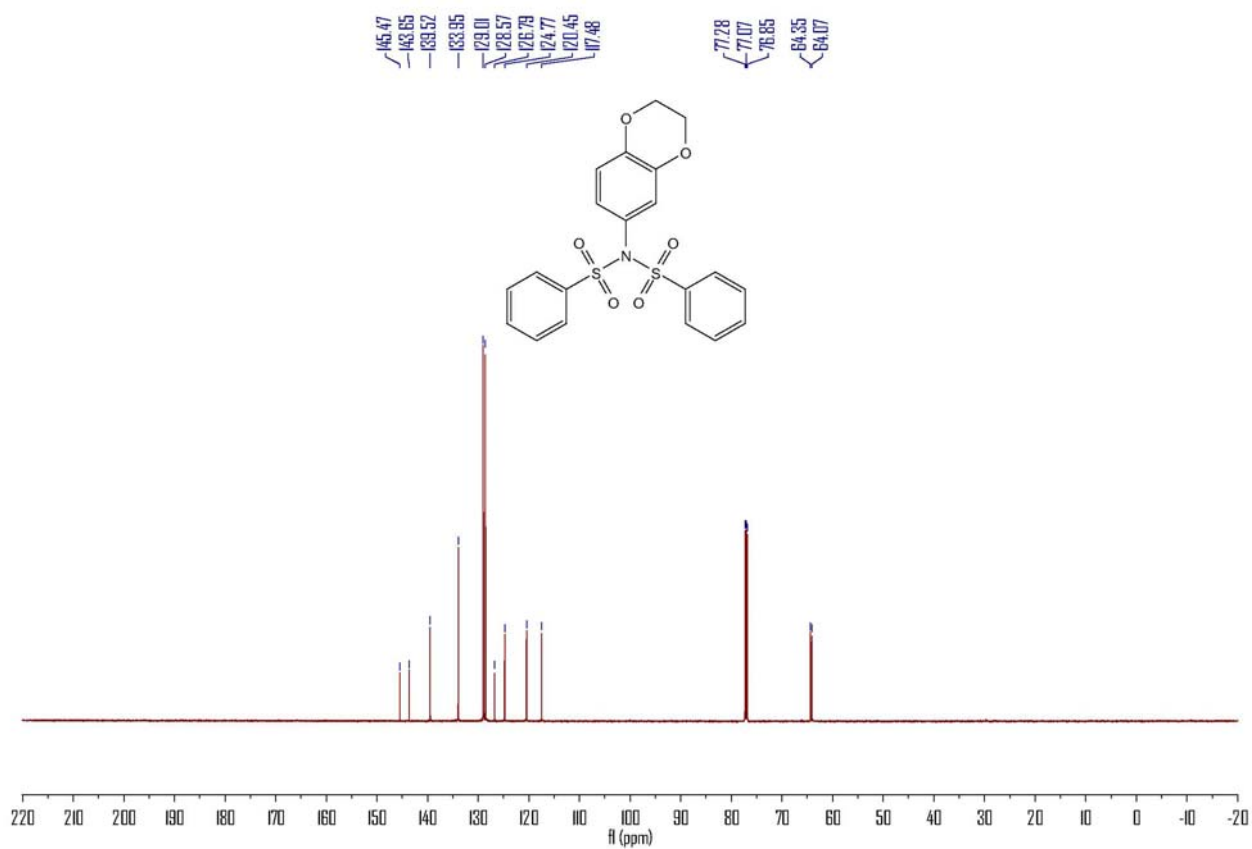

### <sup>1</sup>H NMR of 7f (DMSO-d<sub>6</sub>)

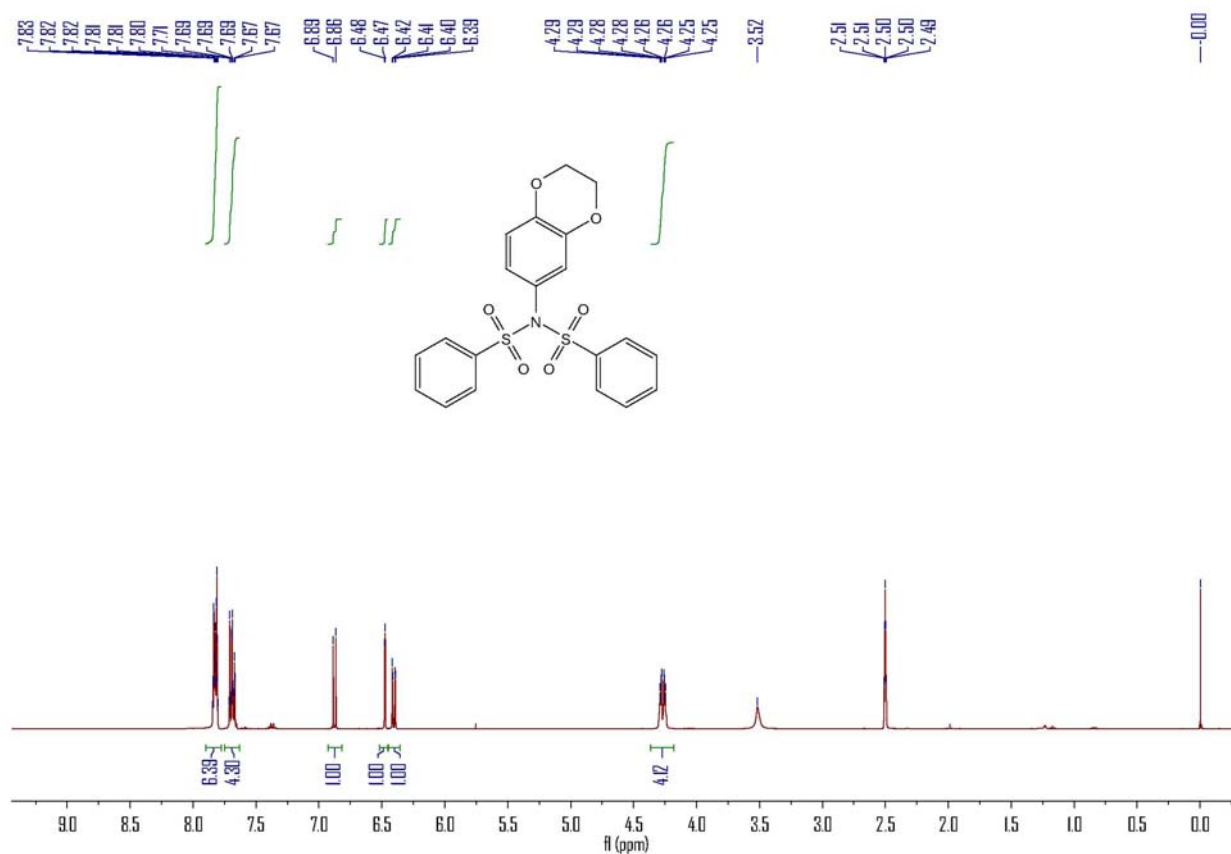

### <sup>13</sup>C NMR of 7f (DMSO-d<sub>6</sub>)

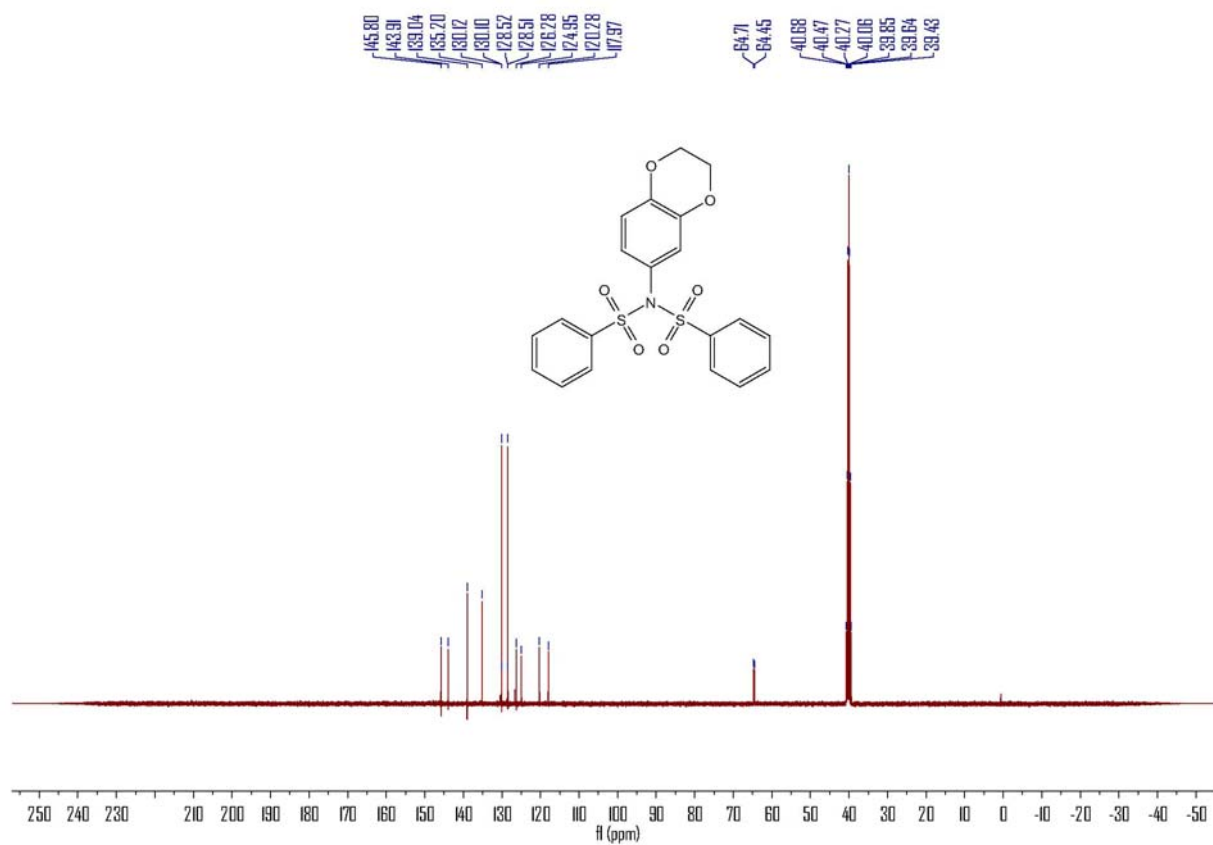



<sup>1</sup>H NMR of **7g** (CDCl<sub>3</sub>)

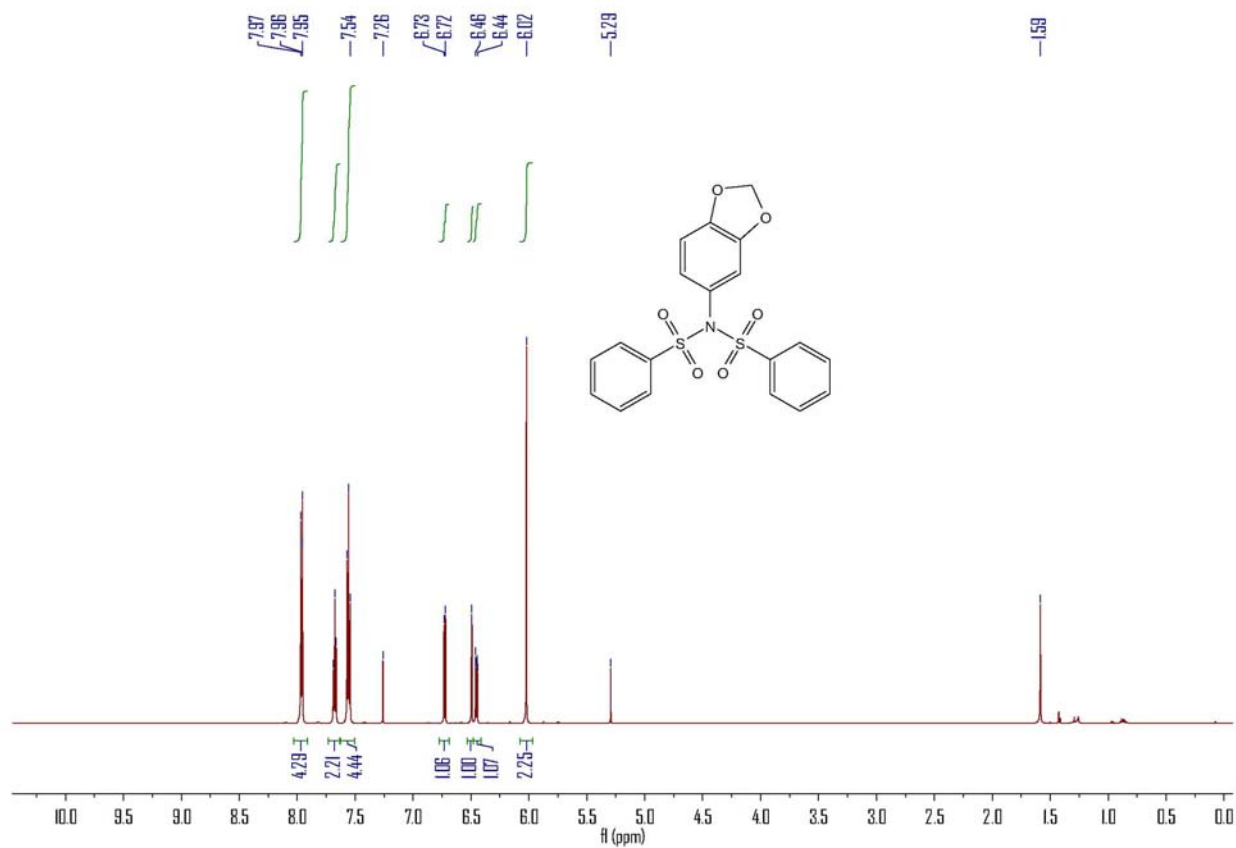

<sup>13</sup>C NMR of **7g** (CDCl<sub>3</sub>)

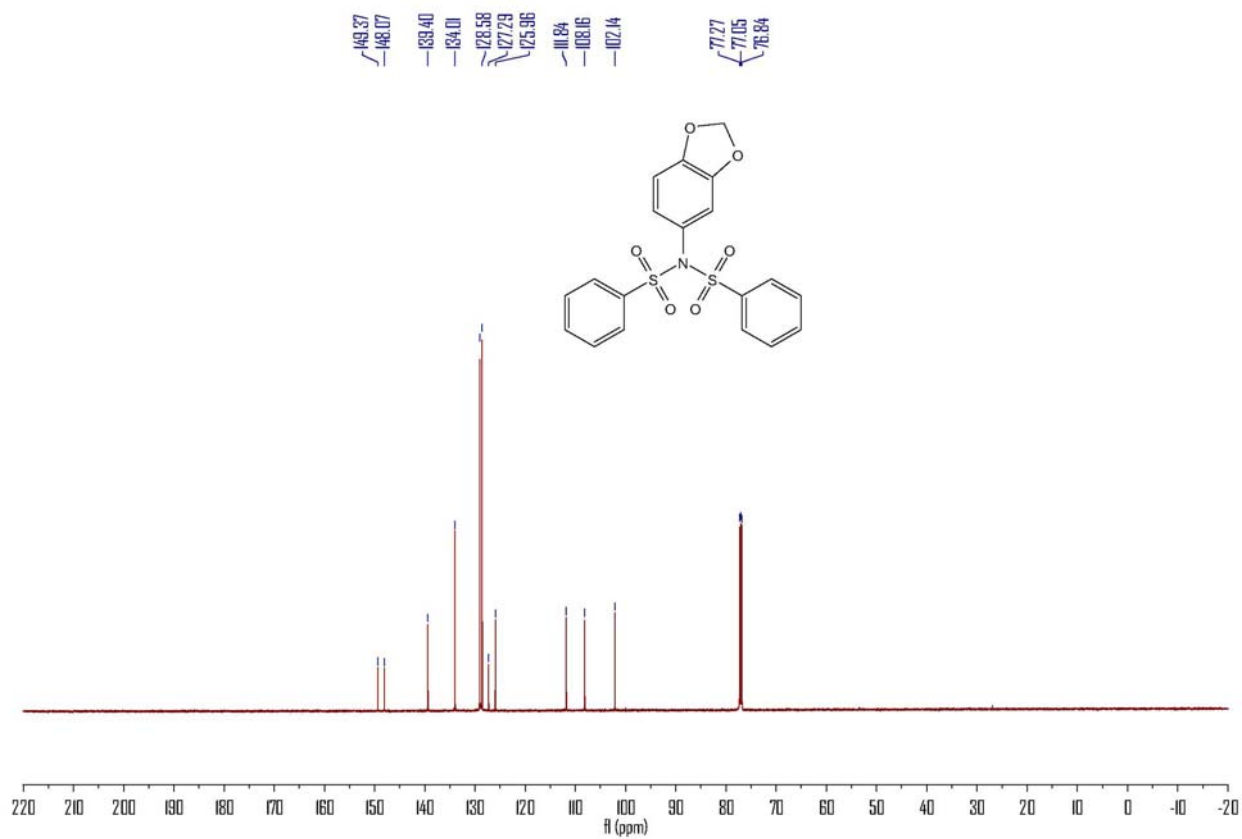

### $^1\text{H}$ NMR of **7g** (DMSO-*d*<sub>6</sub>)

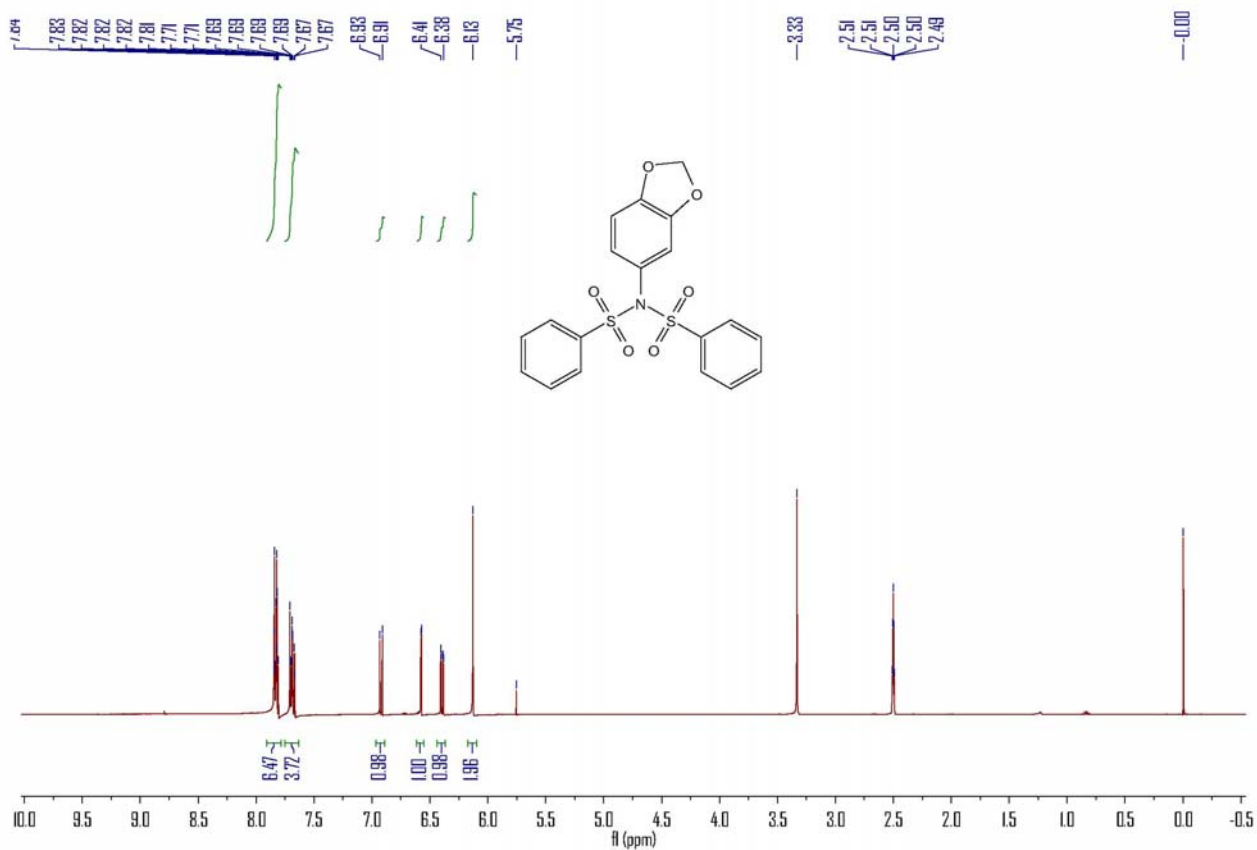

### $^{13}\text{C}$ NMR of **7g** (DMSO-*d*<sub>6</sub>)

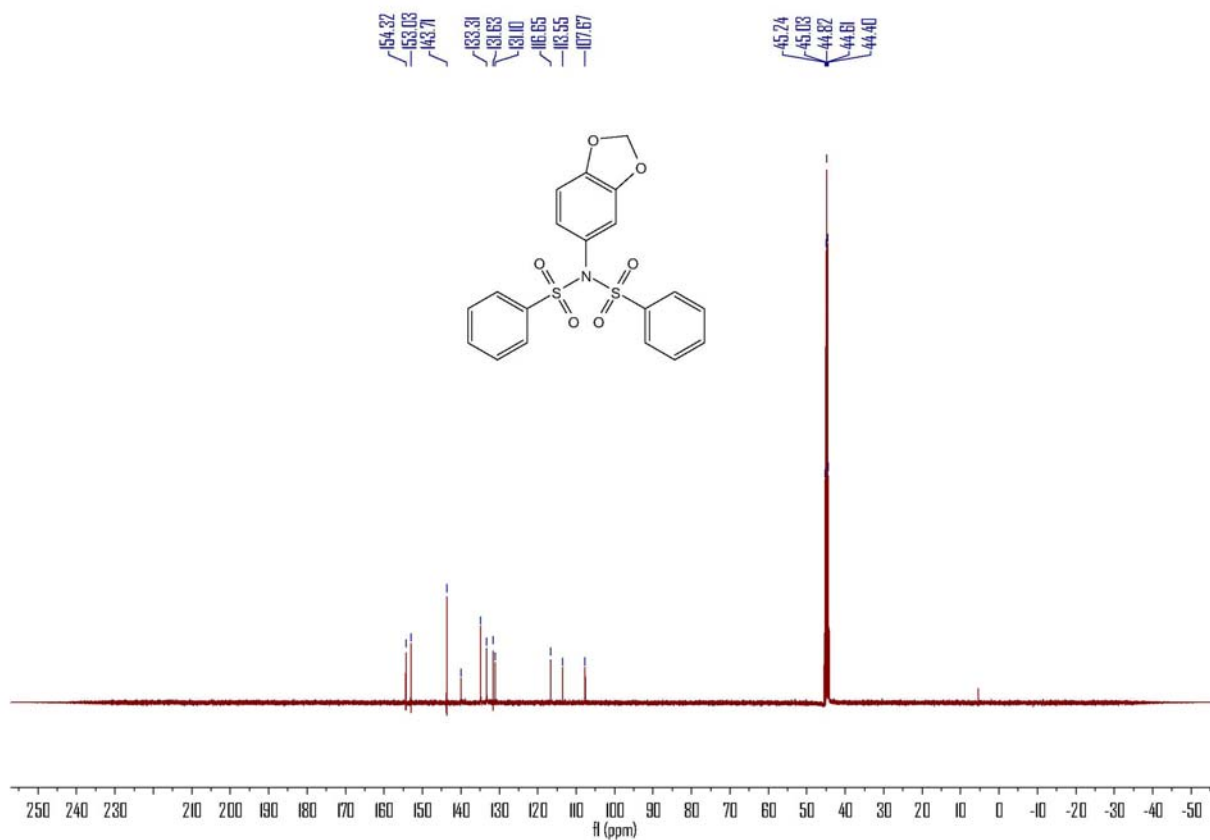

### <sup>1</sup>H NMR of 7h

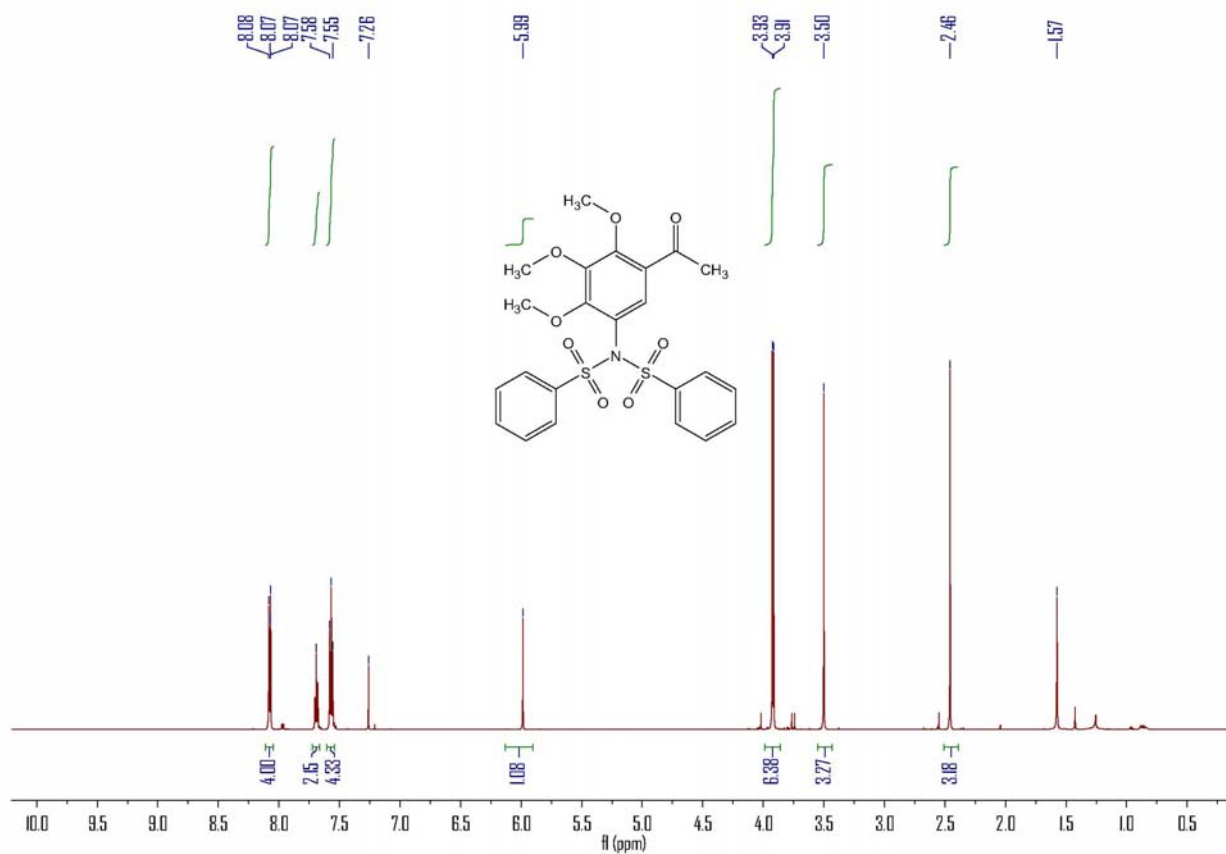

### <sup>13</sup>C NMR of 7h

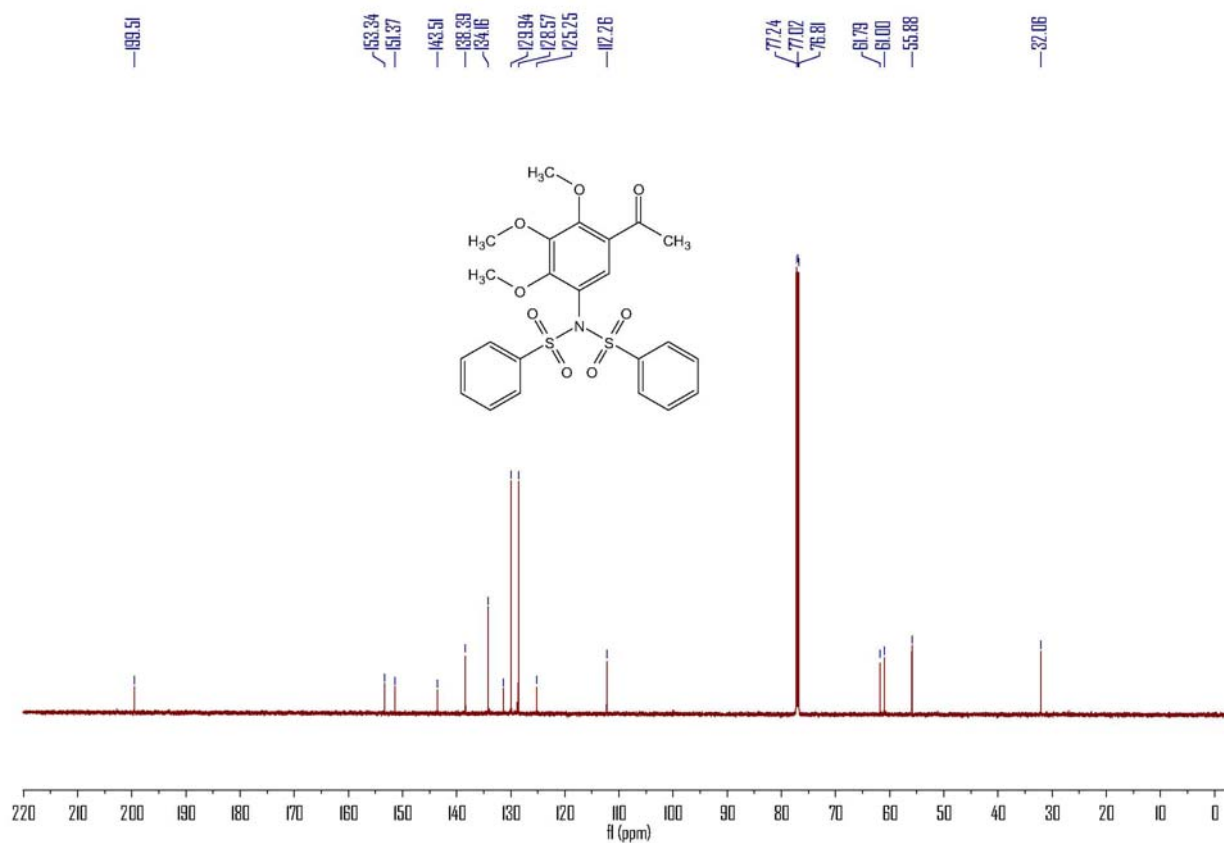

### $^1\text{H}$ NMR of **7i**

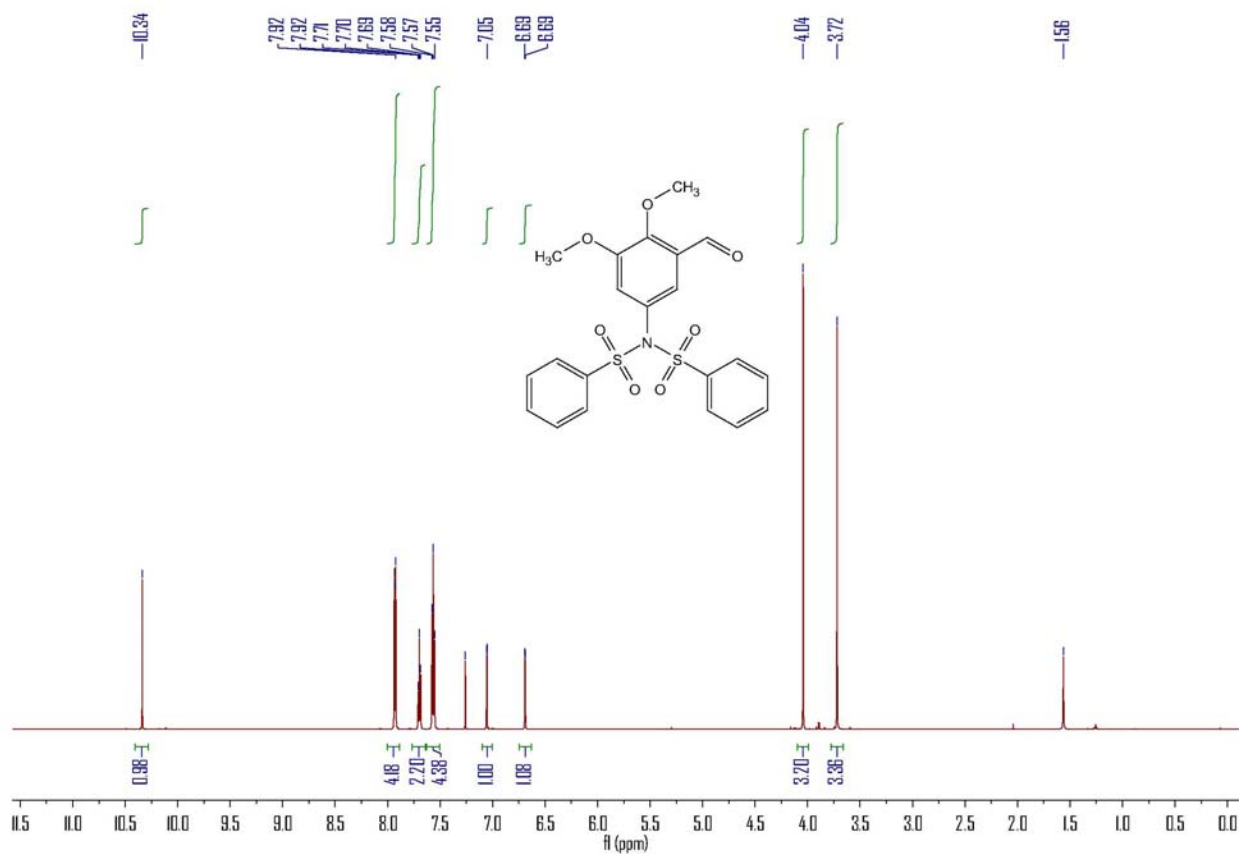

### $^{13}\text{C}$ NMR of **7i**

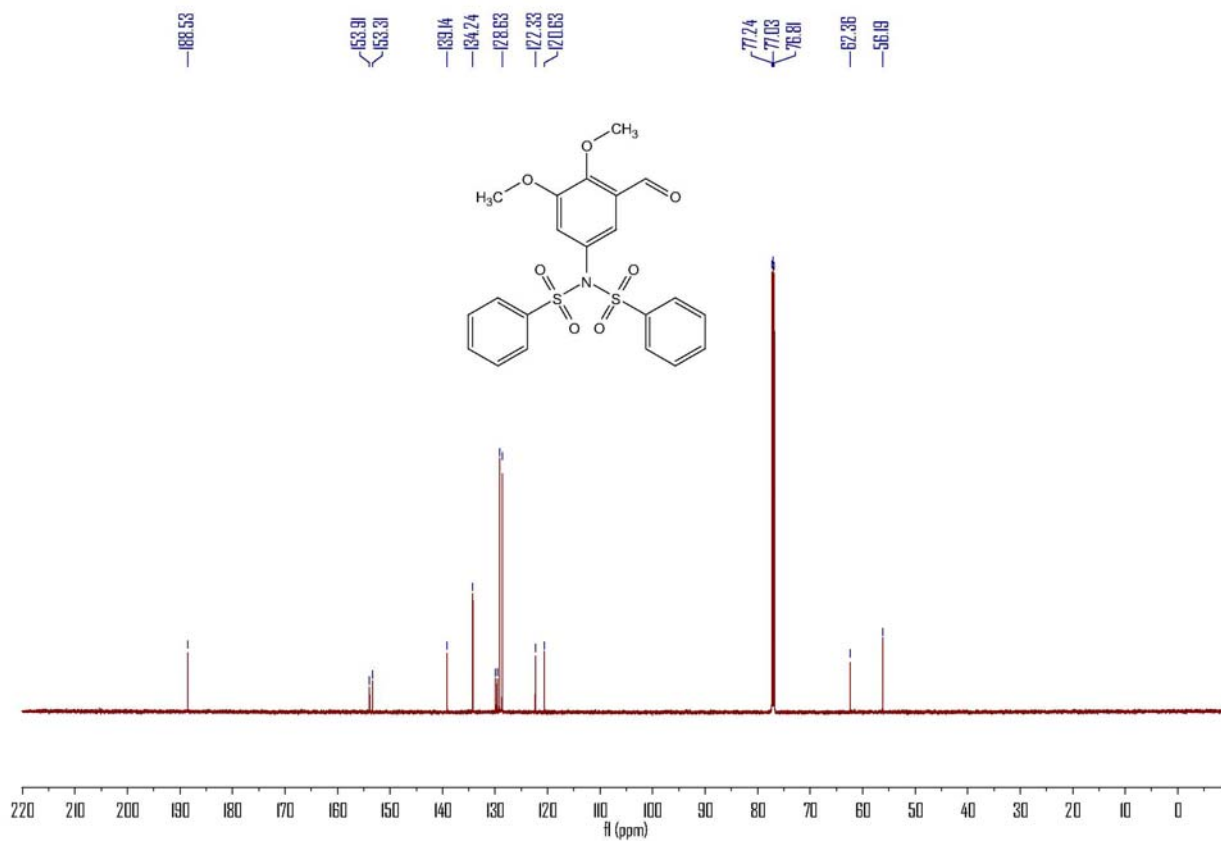

### <sup>1</sup>H NMR of 7j

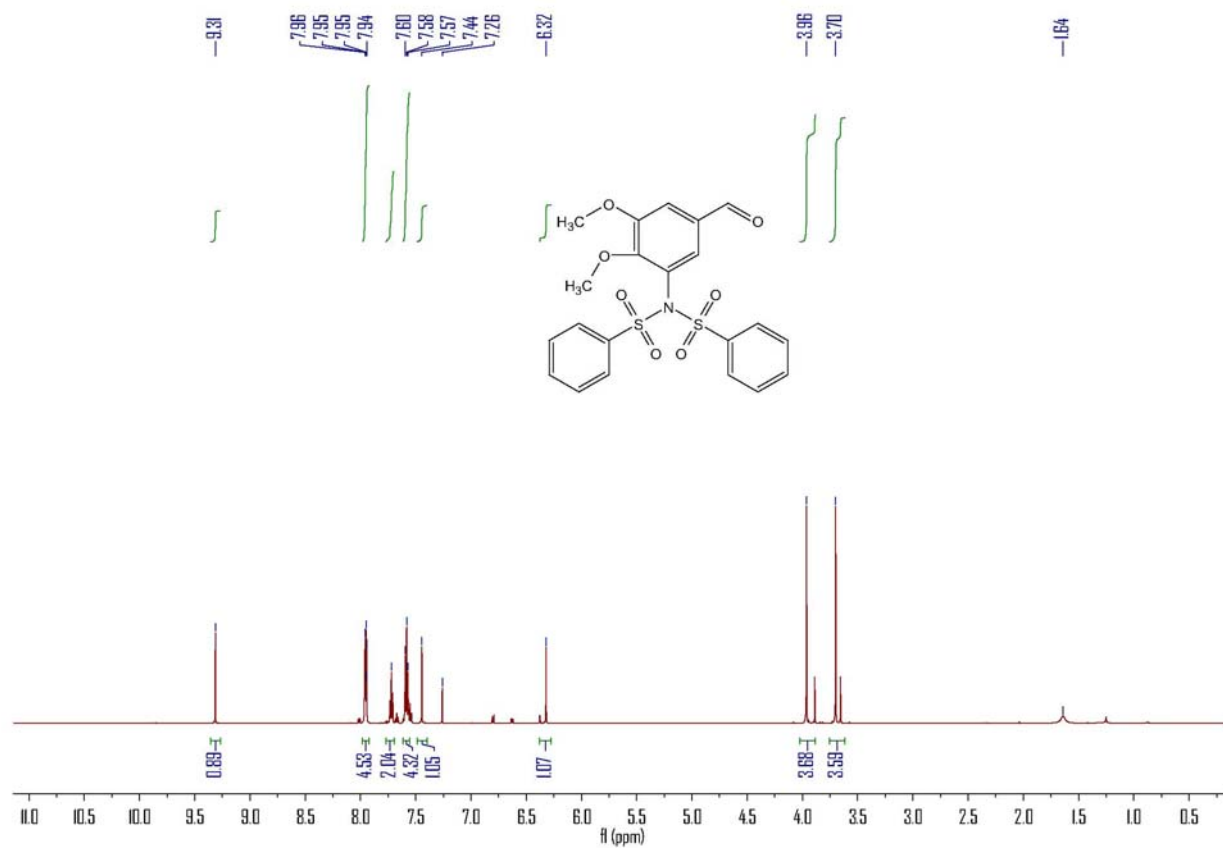

### <sup>13</sup>C NMR of 7j

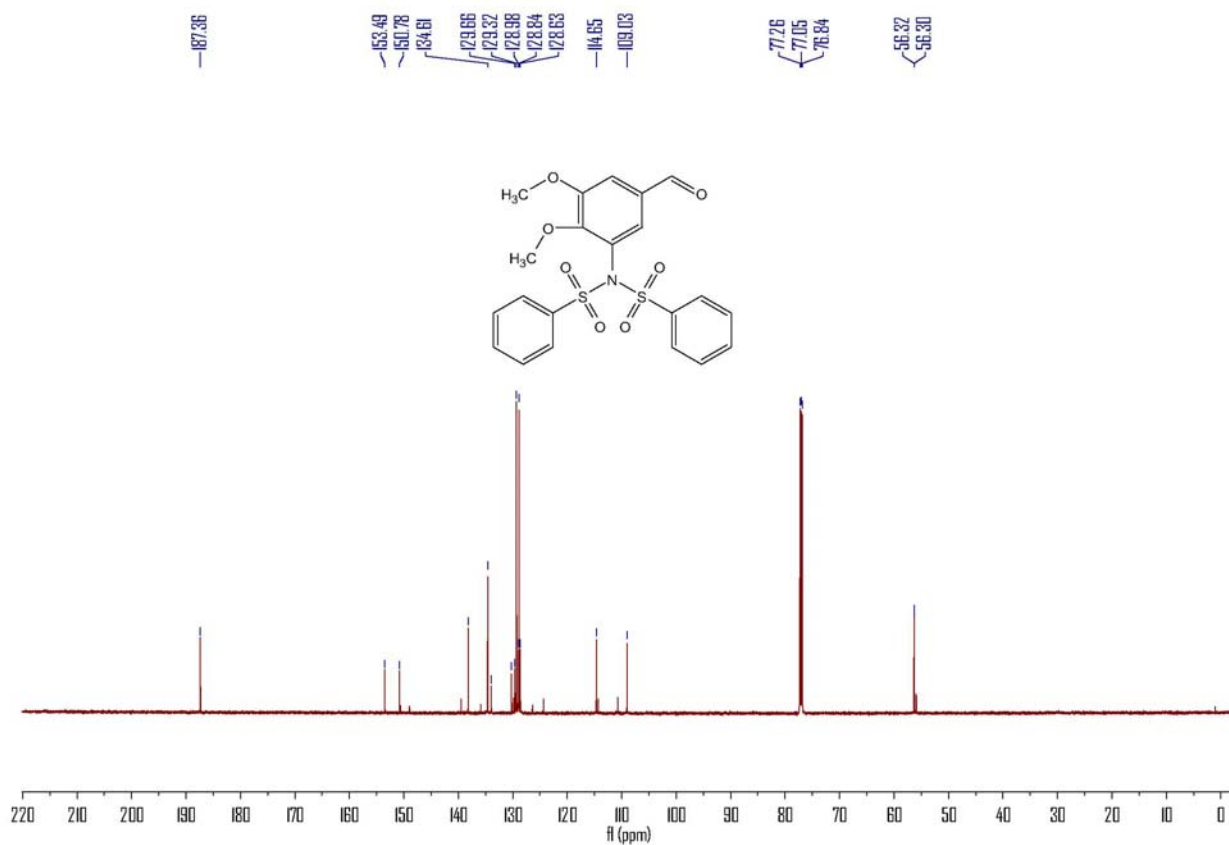

### $^1\text{H}$ NMR of 7k

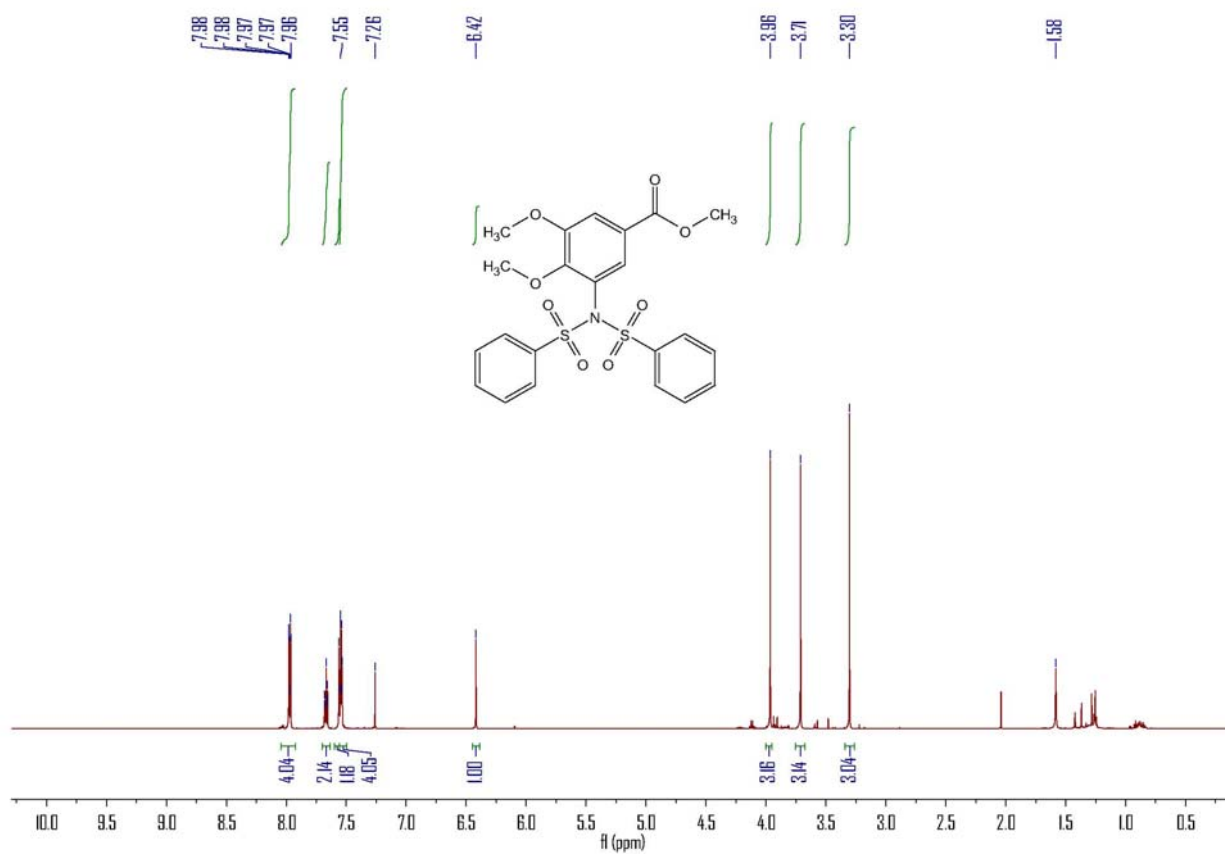

### $^{13}\text{C}$ NMR of 7k

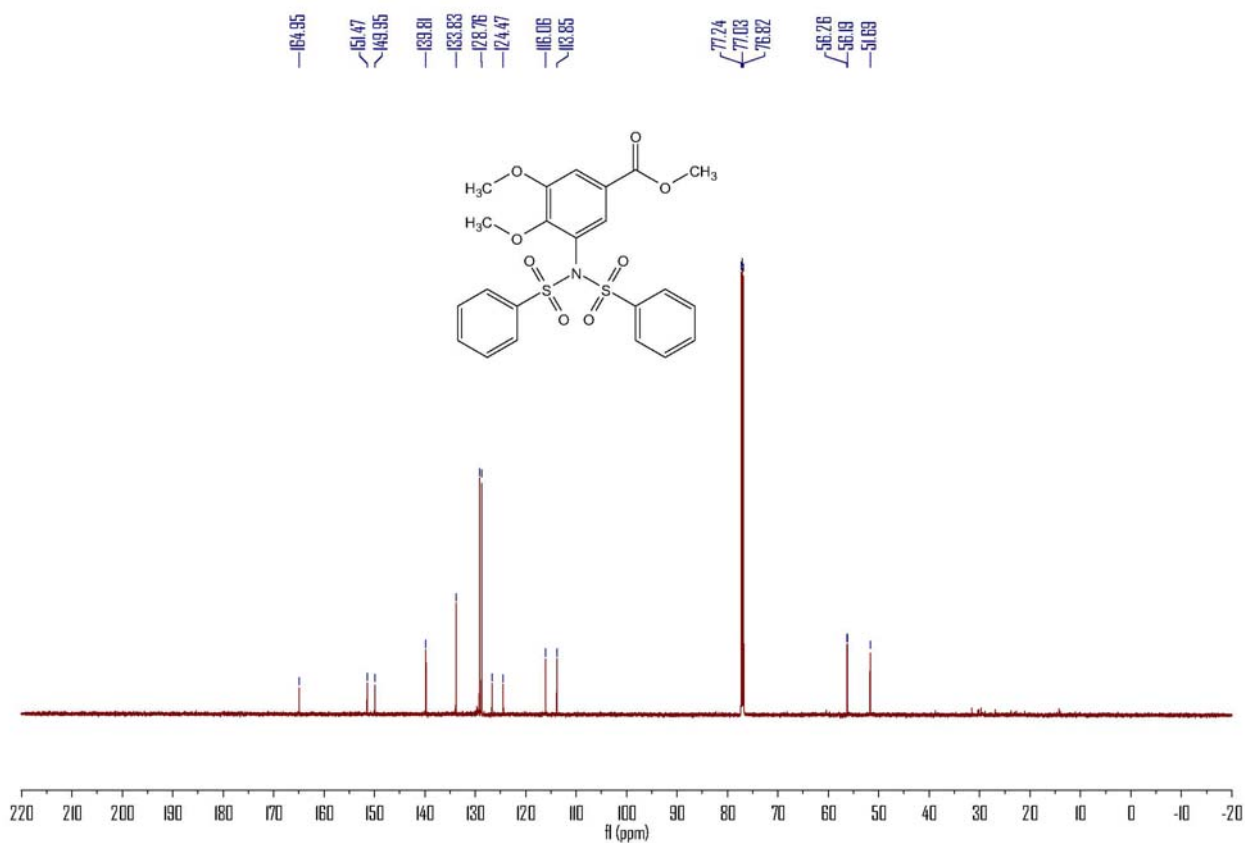

# <sup>1</sup>H NMR of 7I

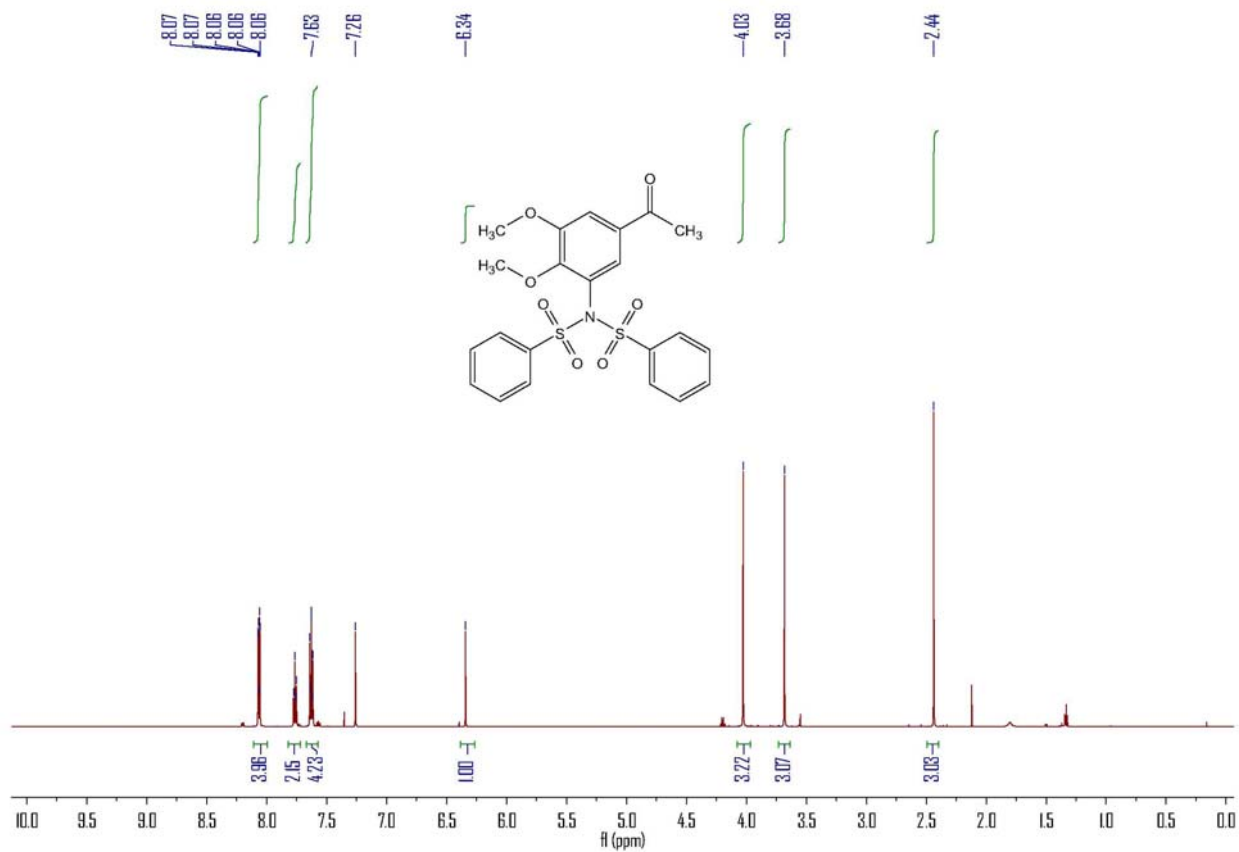

# <sup>13</sup>C NMR of 7I

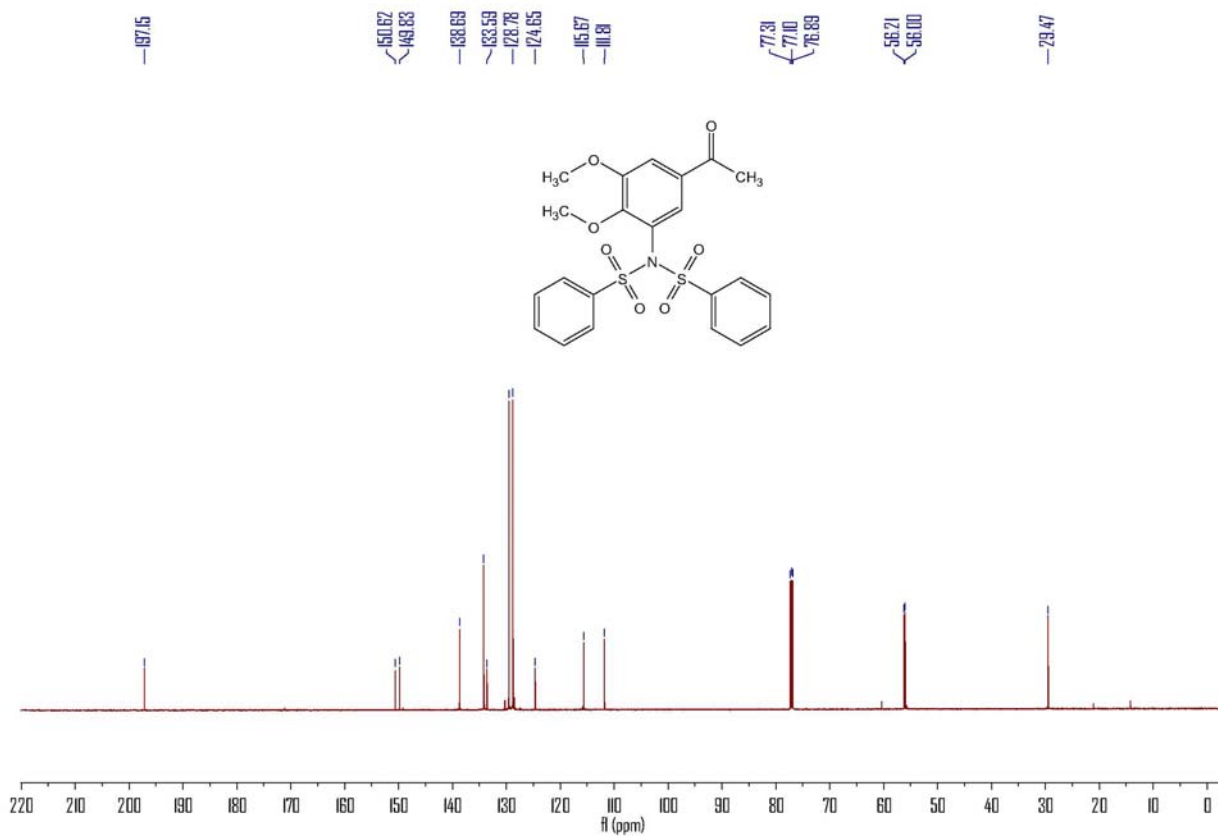

### <sup>1</sup>H NMR of **m**

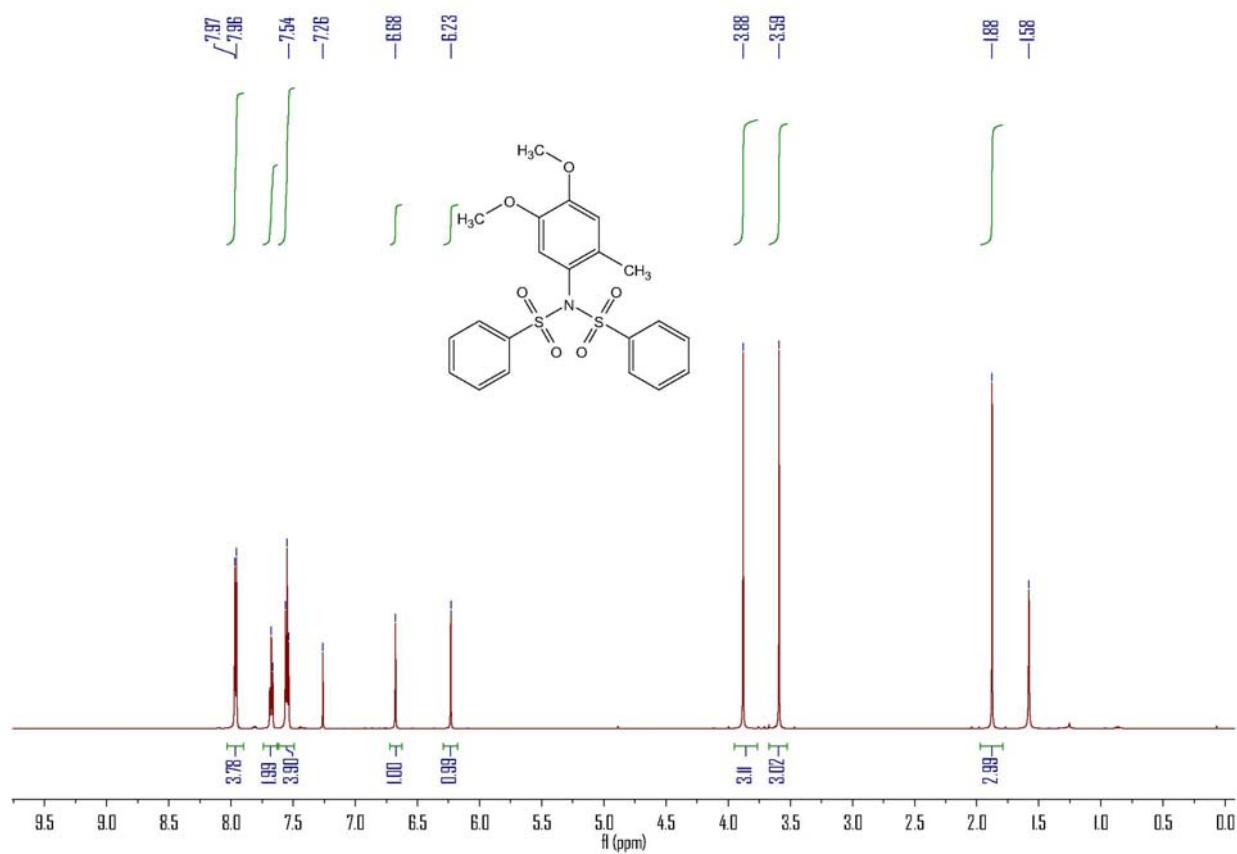

### <sup>13</sup>C NMR of **7m**

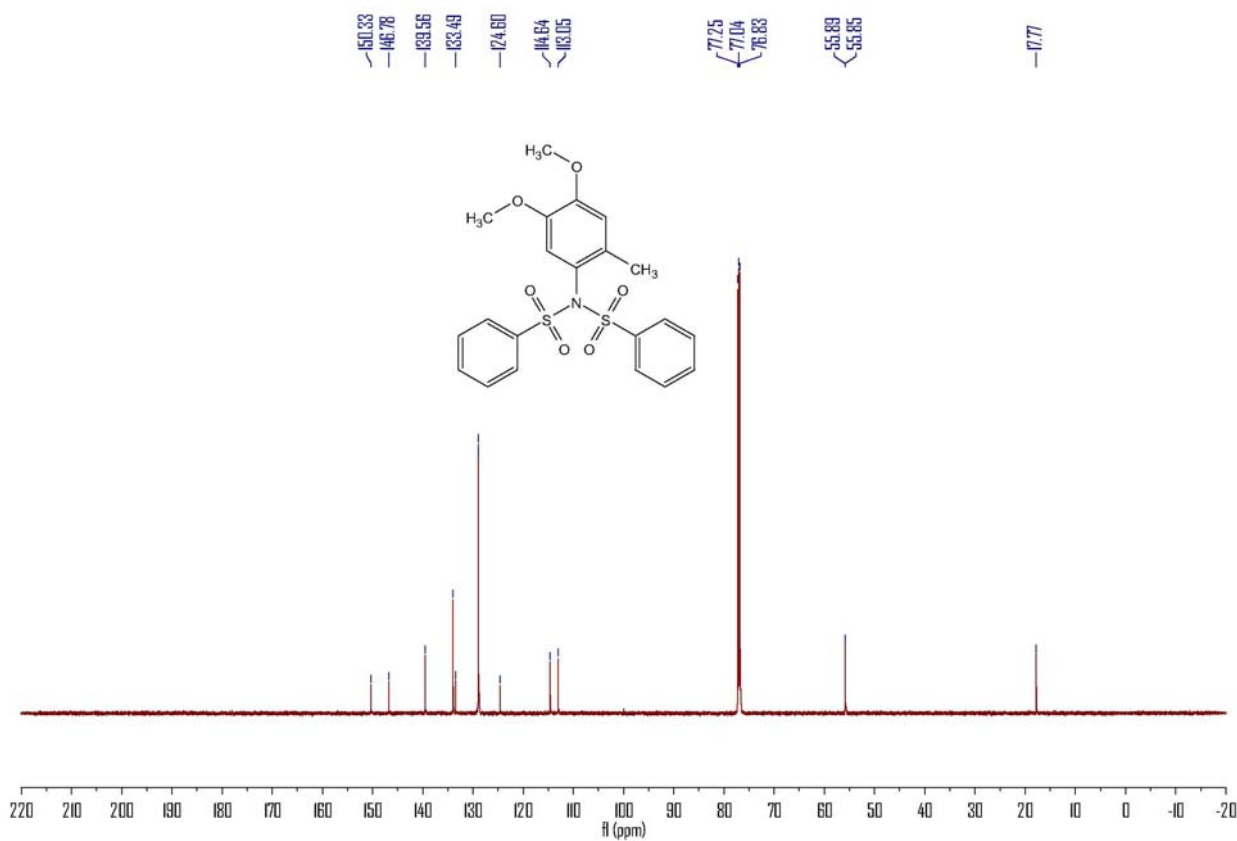



### $^1\text{H}$ NMR of **7n**

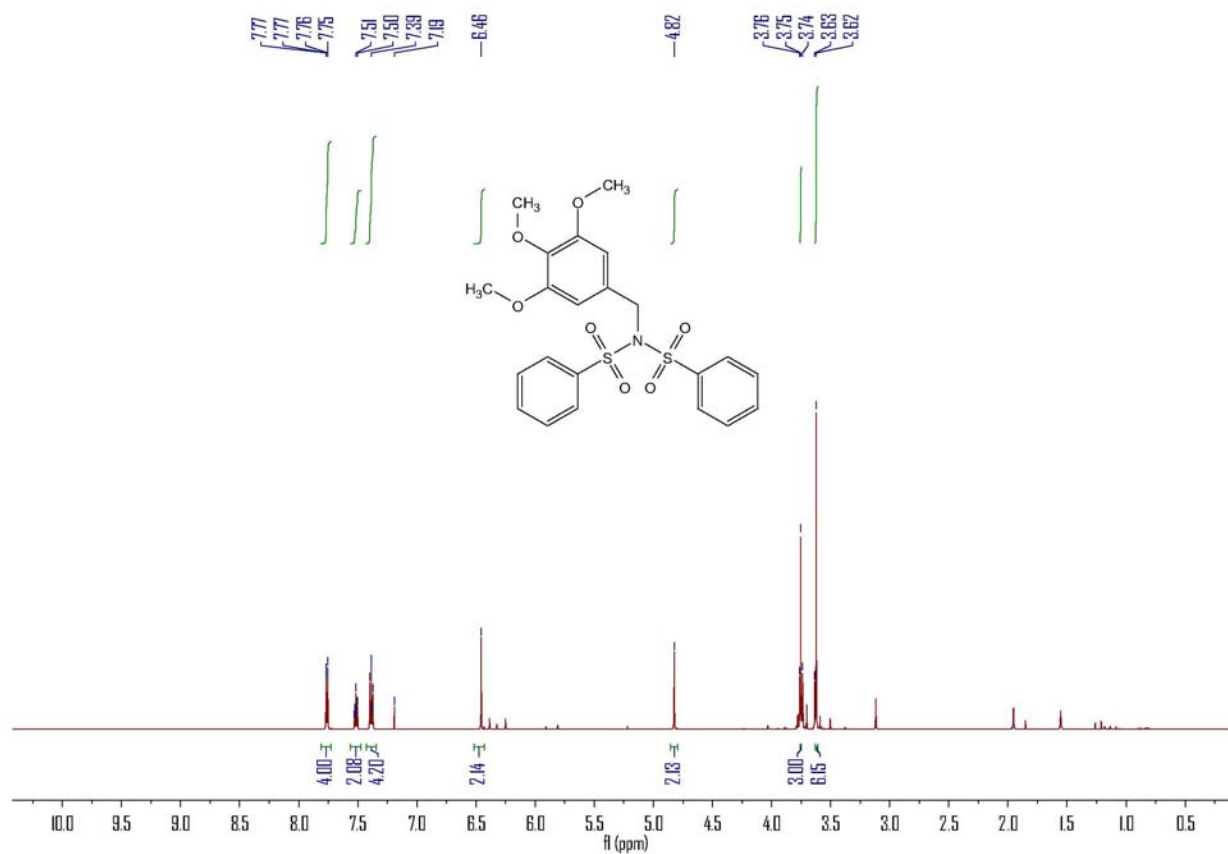

### $^{13}\text{C}$ NMR of **7n**

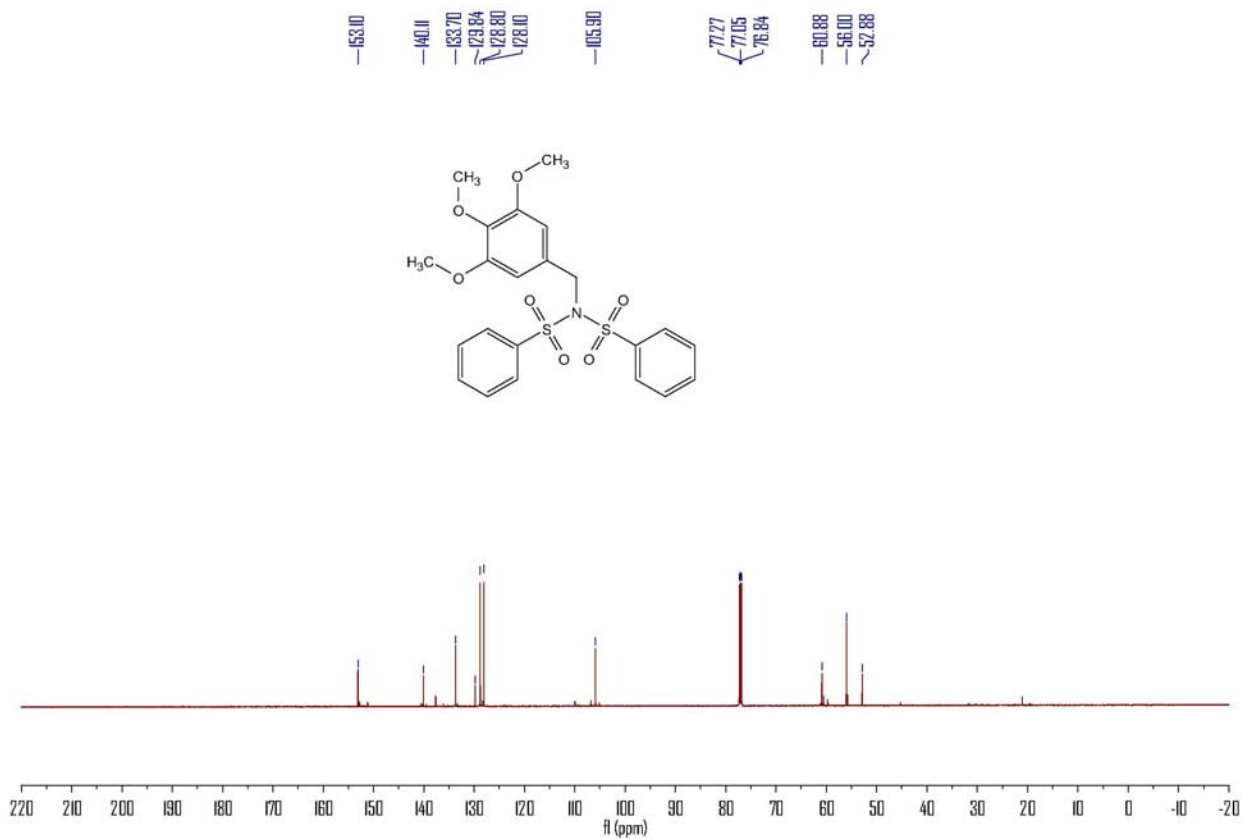

### $^1\text{H}$ NMR of **7o**

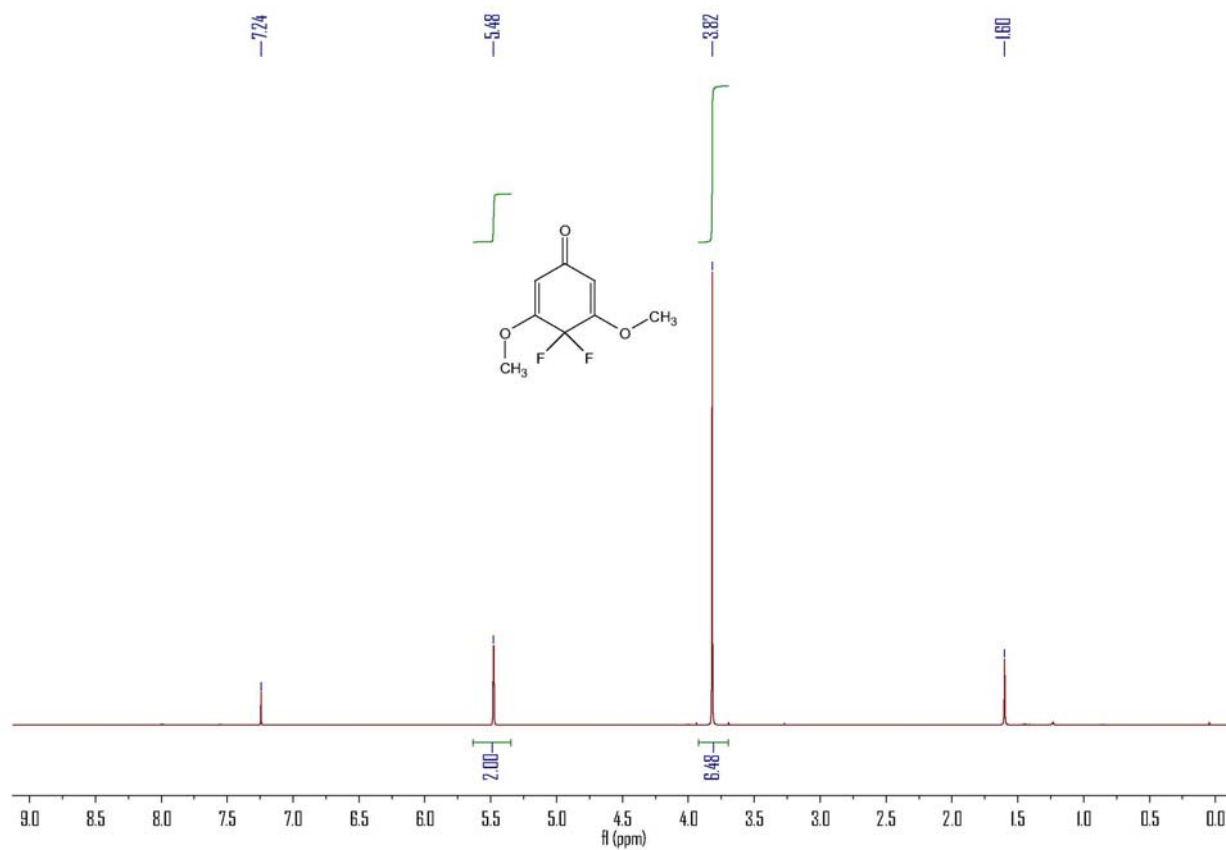

### $^{13}\text{C}$ NMR of **7o**

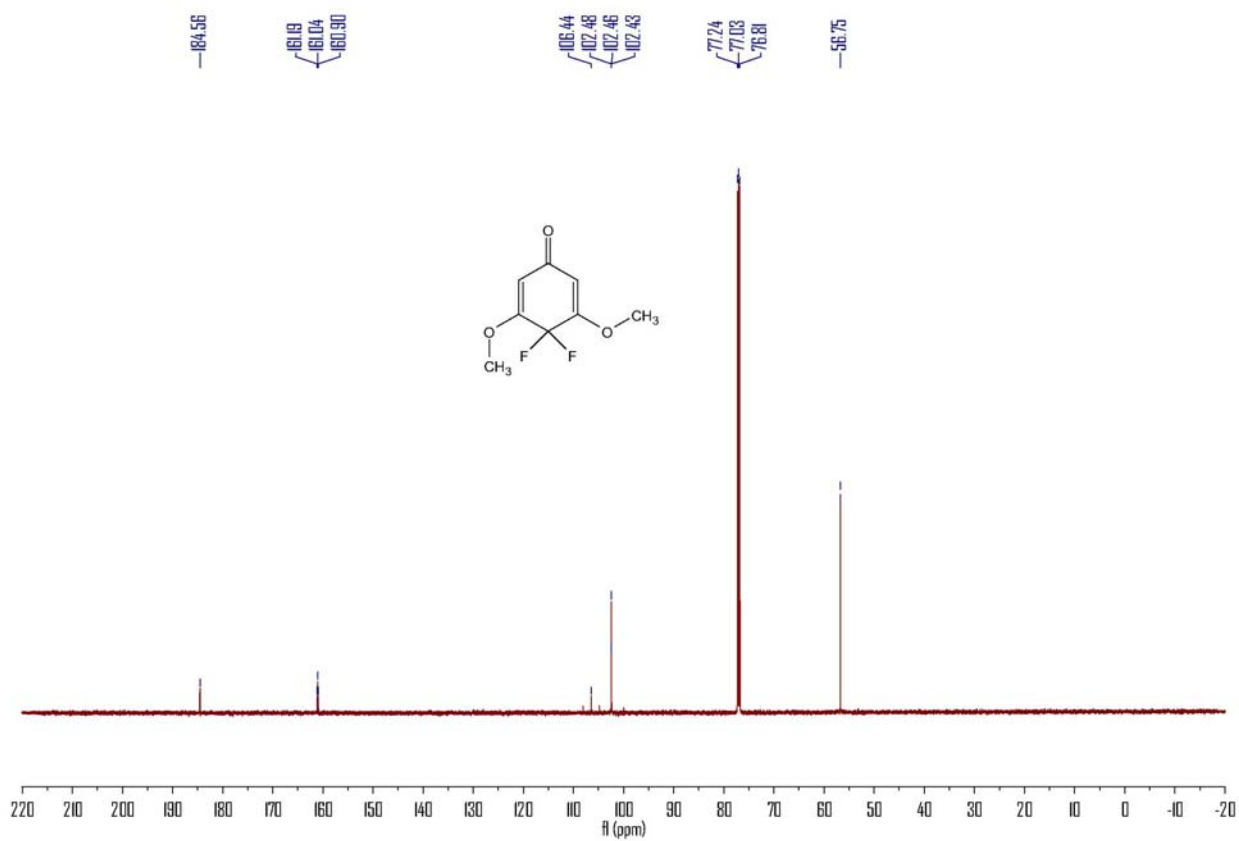

# $^{19}\text{F}$ NMR of **7o**

112.51  
112.51

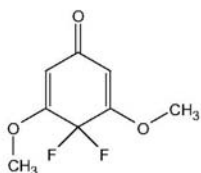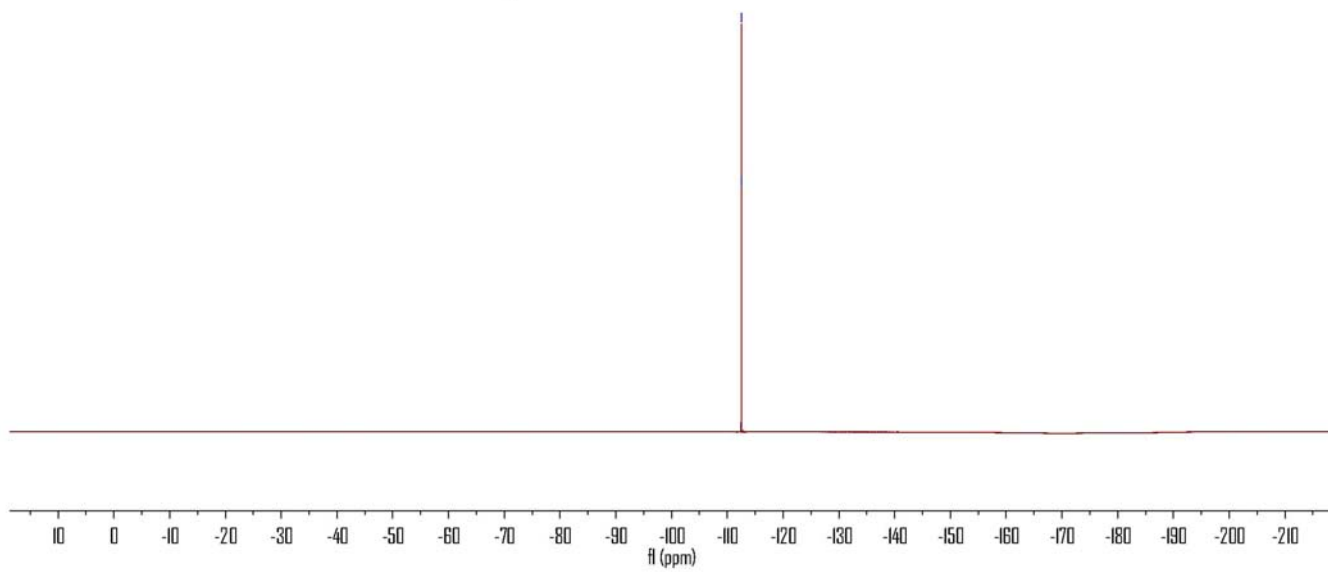

### $^1\text{H}$ NMR of **7p**

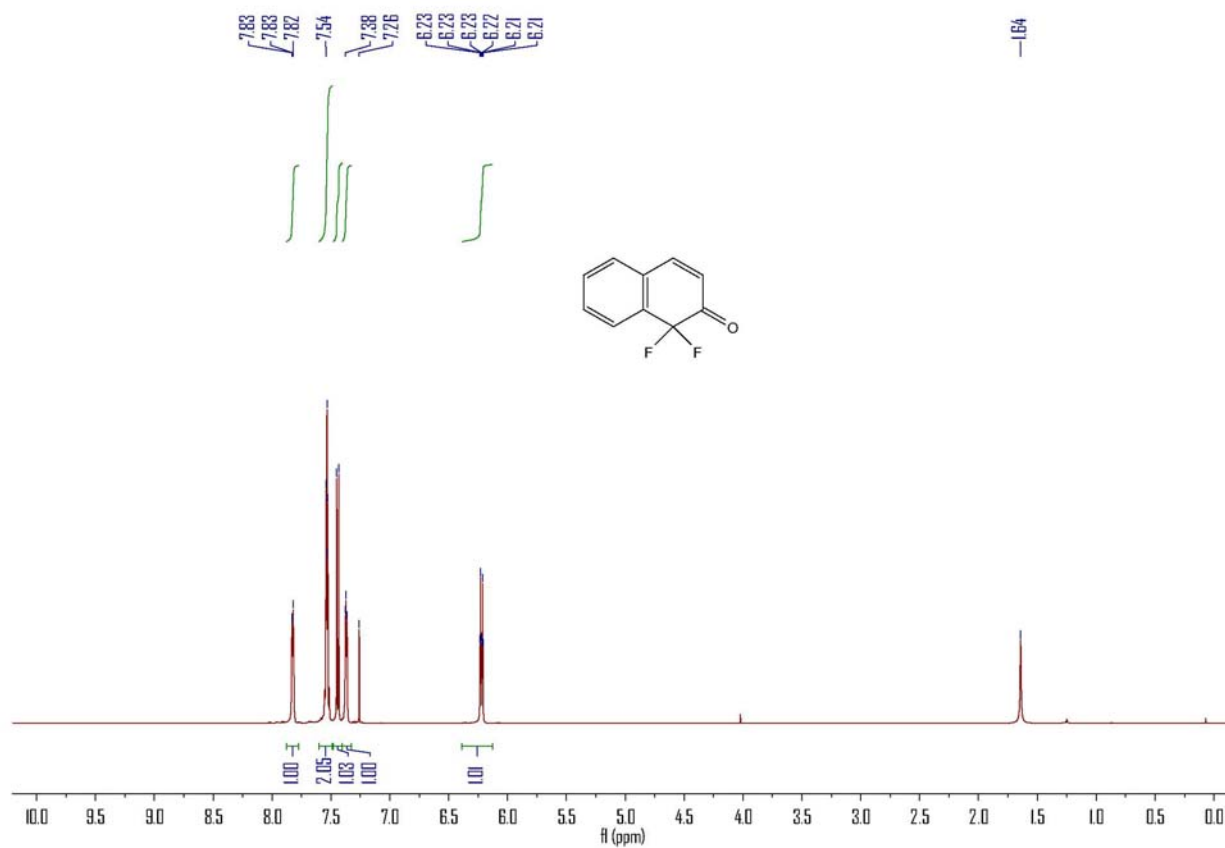

### $^{13}\text{C}$ NMR of **7p**

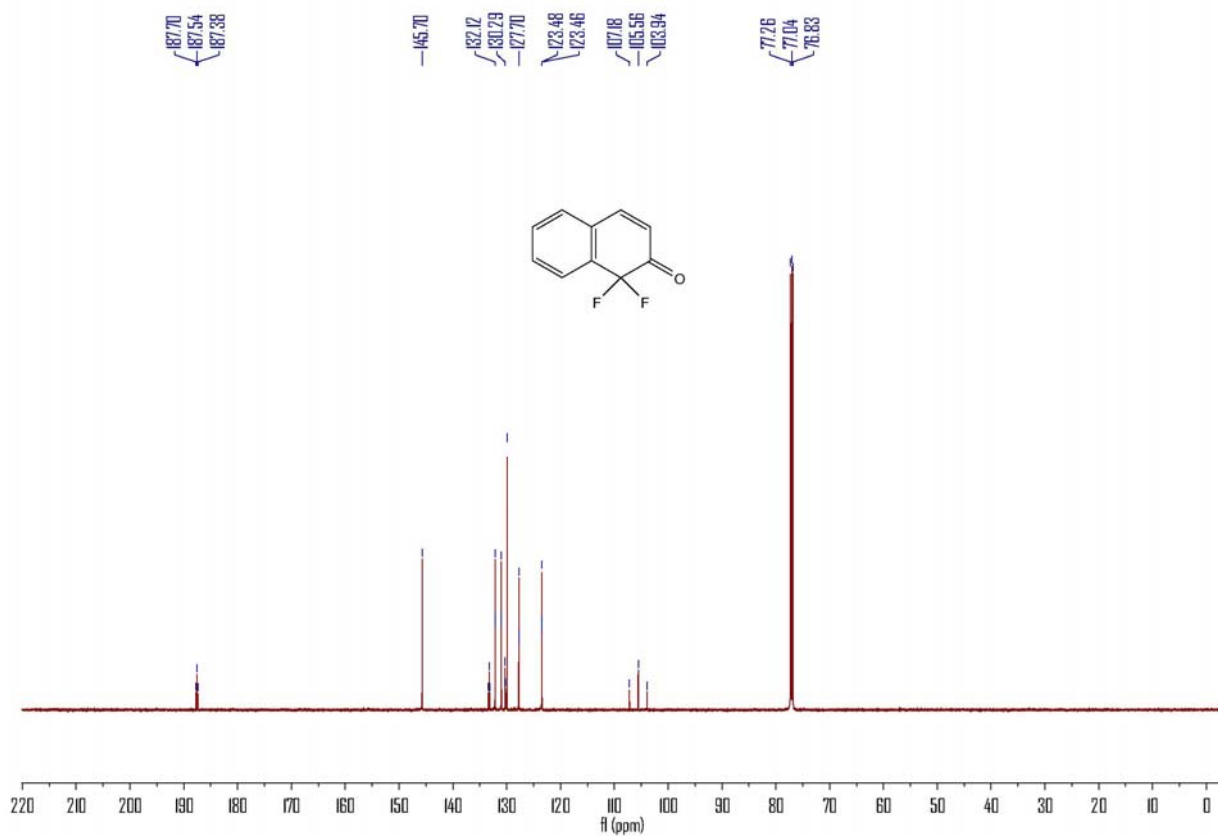

# $^{19}\text{F}$ NMR of 7p

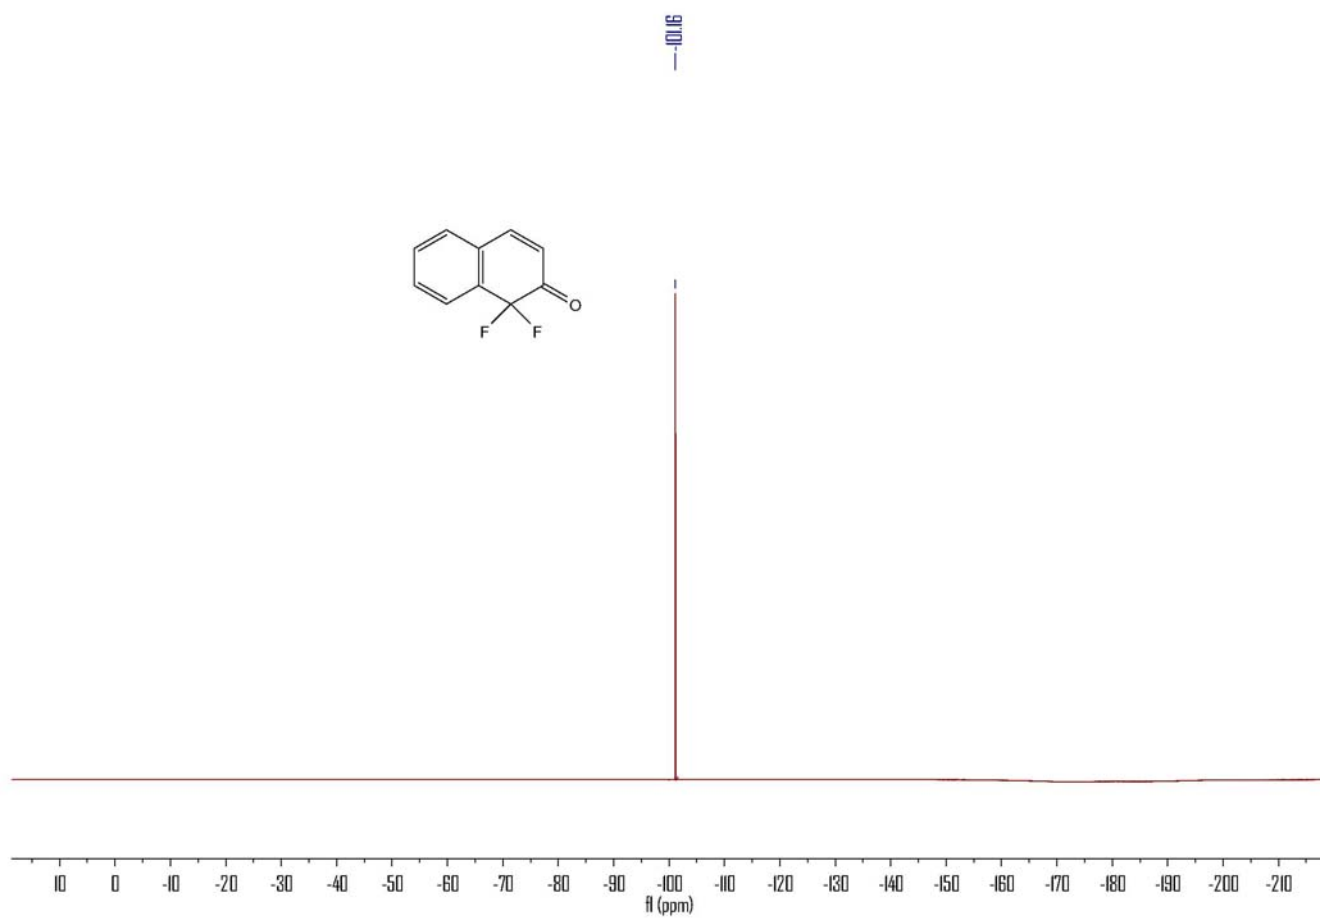

Supplement: d4ra07008a1.pdf [file d4ra07008a1.pdf]
